# Supplementary material
Source: PubMed Central journal article supplement (PMC3823554)

# **Phosphate Tether-Mediated Ring-Closing Metathesis Studies to Complex 1,3-*anti*-Diol-Containing Subunits**

Rambabu Chegondi, Soma Maitra, Jana L. Markley, and Paul R. Hanson\*

*Department of Chemistry, University of Kansas, 1251 Wescoe Hall Drive, Lawrence, KS 66045-7582*

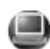

**Table of contents**

|                                                                       |              |
|-----------------------------------------------------------------------|--------------|
| General Methods:                                                      | S-3          |
| Experimental Data:                                                    | S-3 to S-23  |
| <sup>1</sup> H NMR, <sup>13</sup> C NMR, <sup>31</sup> P NMR spectra: | S-24 to S-83 |

**General Methods.** All reactions were carried out in oven- or flame-dried glassware under argon atmosphere using standard gas-tight syringes, cannulas, and septa. Stirring was achieved with oven dried magnetic stir bars. Et<sub>2</sub>O, THF and CH<sub>2</sub>Cl<sub>2</sub> were purified by passage through a purification system (Solv-Tek) employing activated Al<sub>2</sub>O<sub>3</sub> (Grubbs, R. H.; Rosen, R. K.; Timmers, F. J. *Organometallics* **1996**, *15*, 1518-1520). Et<sub>3</sub>N was purified by passage over basic alumina and stored over KOH. Butyl lithium was purchased from Aldrich and titrated prior to use. All olefin metathesis catalysts were acquired from Materia and used without further purification. Flash column chromatography was performed with Sorbent Technologies (30930M-25, Silica Gel 60A, 40-63 μm) and thin layer chromatography was performed on silica gel 60F254 plates (EM-5717, Merck). Deuterated solvents were purchased from Cambridge Isotope laboratories. All NMR spectra were recorded in CDCl<sub>3</sub> (unless otherwise mentioned) on a Bruker DRX (500 or 400 MHz) spectrometers and calibrated to the solvent peak. High-resolution mass spectrometry (HRMS) was recorded on a LCT Premier Spectrometer (Micromass UK Limited) operating on ESI (MeOH). Observed rotations at 589 nm, were measured using AUTOPOL IV Model automatic polarimeter. IR was recorded on Shimadzu FTIR-8400S instrument.

### Experimental data

**(4*R*,6*R*)-2-(((2*S*,3*S*,4*S*)-1-((4-methoxybenzyl)oxy)-2,4-dimethylhex-5-en-3-yl)oxy)-4,6-divinyl-1,3,2-dioxaphosphinane 2-oxide (10):**

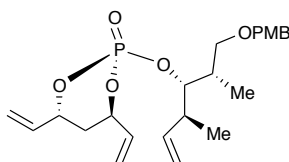

**FTIR** (neat): 2978, 2962, 1610, 1521, 1278, 1249, 1000, 836, 746 cm<sup>-1</sup>;

**Optical Rotation:** [ $\alpha$ ]<sub>D</sub> = -26.2 (*c* = 1, CHCl<sub>3</sub>);

**<sup>1</sup>H NMR** (500 MHz, CDCl<sub>3</sub>)  $\delta$  7.28 (d, *J* = 8.6 Hz, 2H), 6.87 (d, *J* = 8.6 Hz, 2H), 6.00 (dddd, *J* = 17.1, 10.5, 6.2, 0.8 Hz, 1H), 5.90 (dddd, *J* = 17.1, 10.7, 5.1, 1.7 Hz, 1H), 5.85–5.79 (m, 1H), 5.44 (ddd, *J* = 17.1, 1.5, 1.2 Hz, 1H), 5.35 (ddd, *J* = 17.2, 1.3, 1.0 Hz, 1H), 5.27 (dddd, *J* = 10.7, 4.8, 1.3, 1.0 Hz, 2H), 5.06–5.00 (m, 3H), 4.96 (ddt, *J* = 9.6, 7.9, 5.0 Hz, 1H), 4.55 (dddd, *J* = 9.7, 6.5, 4.3 Hz, 1H), 4.51 (d, *J* = 11.5 Hz, 1H), 4.38 (d, *J* = 11.5 Hz, 1H), 3.80 (s, 3H), 3.49 (dd, *J* = 9.2, 6.2 Hz, 1H), 3.35 (dd, *J* = 9.2, 6.6 Hz, 1H), 2.53–2.43 (m, 1H), 2.14 (dddd, *J* = 14.5, 7.9, 4.8, 1.5 Hz, 1H), 2.10–2.05 (m, 1H), 2.02 (dddd, *J* = 14.6, 5.6, 3.9, 1.7 Hz, 1H), 1.04 (d, *J* = 6.4 Hz, 3H), 1.00 (d, *J* = 5.8 Hz, 3H);

**<sup>13</sup>C NMR** (126 MHz, CDCl<sub>3</sub>)  $\delta$  159.1, 140.0, 135.4 (d, *J*<sub>CP</sub> = 3.9 Hz), 135.3 (d, *J*<sub>CP</sub> = 7.6 Hz), 130.7, 129.4, 117.7, 117.1, 115.6, 113.7, 85.0 (d, *J*<sub>CP</sub> = 7.4 Hz), 77.4 (d, *J*<sub>CP</sub> = 6.7 Hz), 75.5 (d, *J*<sub>CP</sub> = 6.2 Hz), 72.8, 72.6, 55.3, 41.2 (d, *J*<sub>CP</sub> = 3.5 Hz), 36.2 (d, *J*<sub>CP</sub> = 3.9 Hz), 35.2 (d, *J*<sub>CP</sub> = 7.3 Hz), 17.5, 11.8;

**<sup>31</sup>P NMR** (162 MHz, CDCl<sub>3</sub>)  $\delta$  -6.64;

**HRMS:** cald. for C<sub>23</sub>H<sub>33</sub>O<sub>6</sub>PNa (M+Na)<sup>+</sup> 459.1912; found 459.1895 (TOF MS ES+).

**(4*S*,6*S*)-2-(((2*S*,3*S*,4*S*)-3-hydroxy-2,4-dimethylhex-5-en-1-yl)oxy)-4,6-divinyl-1,3,2-dioxaphosphinane 2-oxide (13a):**

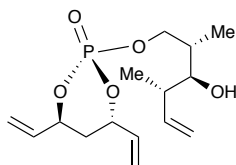

**FTIR** (neat): 2959, 2910, 1650, 1392, 1272, 1118, 1012, 927, 877  $\text{cm}^{-1}$ ;

**Optical Rotation:**  $[\alpha]_{\text{D}} = +56.2$  ( $c = 1.5$ ,  $\text{CHCl}_3$ );

**$^1\text{H}$  NMR** (500 MHz,  $\text{CDCl}_3$ )  $\delta$  5.97 (ddd,  $J = 16.7, 10.6, 6.0$  Hz, 1H), 5.85 (dddd,  $J = 17.3, 10.6, 5.2, 1.6$  Hz, 1H), 5.71 (ddd,  $J = 17.3, 10.2, 8.4$  Hz, 1H), 5.41 (dd,  $J = 17.1, 1.1$  Hz, 1H), 5.32 (dd,  $J = 17.2, 1.0$  Hz, 1H), 5.25 (ddd,  $J = 10.6, 6.6, 1.0$  Hz, 2H), 5.09–5.03 (m, 2H), 5.02–4.91 (m, 2H), 4.11–4.05 (m, 1H), 3.92 (ddd,  $J = 10.0, 7.7, 6.1$  Hz, 1H), 3.38 (dd,  $J = 8.8, 2.8$  Hz, 1H), 2.25–2.17 (m, 1H), 2.12 (dddd,  $J = 14.6, 8.1, 4.8, 1.5$  Hz, 2H), 2.03–1.97 (m, 2H), 0.91 (d,  $J = 6.8$  Hz, 3H), 0.84 (d,  $J = 6.9$  Hz, 3H);

**$^{13}\text{C}$  NMR** (126 MHz,  $\text{CDCl}_3$ )  $\delta$  141.6, 135.0 (d,  $J_{\text{CP}} = 1.8$  Hz), 135.0 (d,  $J_{\text{CP}} = 3.1$  Hz), 118.2, 117.6, 116.2, 77.6 (d,  $J_{\text{CP}} = 6.7$  Hz), 76.4 (d,  $J_{\text{CP}} = 6.0$  Hz), 72.6, 70.3 (d,  $J_{\text{CP}} = 6.0$  Hz), 41.8, 35.5 (d,  $J_{\text{CP}} = 6.1$  Hz), 35.1 (d,  $J_{\text{CP}} = 7.7$  Hz), 16.4, 8.8;

**$^{31}\text{P}$  NMR** (162 MHz,  $\text{CDCl}_3$ )  $\delta$  -6.62;

**HRMS:** calcd. for  $\text{C}_{15}\text{H}_{26}\text{O}_5\text{P}$  ( $\text{M}+\text{H}$ ) $^+$  317.1518; found 317.1513 (TOF MS ES+).

**(1*S*,4*S*,5*S*,6*S*,9*S*,11*S*,*E*)-5-hydroxy-4,6-dimethyl-11-vinyl-2,12,13-trioxa-1-phospha-bicyclo[7.3.1]tridec-7-ene 1-oxide (14a):**

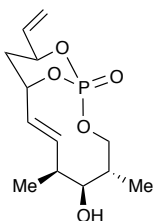

**FTIR** (neat): 2962, 2958, 1459, 1245, 1012  $\text{cm}^{-1}$ ;

**Optical Rotation:**  $[\alpha]_{\text{D}} = +47.6$  ( $c = 0.105$ ,  $\text{CHCl}_3$ );

**$^1\text{H}$  NMR** (500 MHz,  $\text{CDCl}_3$ )  $\delta$  6.21 (ddd,  $J = 16.1, 8.7, 1.8$  Hz, 1H), 5.87 (dddd,  $J = 17.9, 9.9, 4.8, 1.7$  Hz, 1H), 5.83 (dd,  $J = 15.4, 4.6$  Hz, 1H), 5.44 (ddd,  $J = 17.1, 1.1, 1.1$  Hz, 1H), 5.29 (ddd,  $J = 10.7, 1.1, 1.0$  Hz, 1H), 5.19–5.07 (m, 2H), 4.28 (dd,  $J = 10.9, 5.6$  Hz, 1H), 3.95 (dd,  $J = 11.1, 5.0$  Hz, 1H), 3.73 (d,  $J = 5.9$  Hz, 1H), 2.71–2.61 (m, 1H), 2.24 (ddd,  $J = 14.6, 12.1, 5.2$  Hz, 1H), 2.06–1.97 (m, 1H), 1.83 (ddd,  $J = 14.6, 3.7, 2.1$  Hz, 1H), 1.69 (s, 1H), 1.16 (d,  $J = 7.1$  Hz, 3H), 1.11 (d,  $J = 7.2$  Hz, 3H);

**$^{13}\text{C}$  NMR** (126 MHz,  $\text{CDCl}_3$ )  $\delta$  139.9, 135.3 (d,  $J_{\text{CP}} = 10.1$  Hz), 127.7, 117.1, 79.4, 77.2, 76.3 (d,  $J_{\text{CP}} = 6.4$  Hz), 75.1 (d,  $J_{\text{CP}} = 7.0$  Hz), 64.2, 39.4, 37.3 (d,  $J_{\text{CP}} = 10.1$  Hz), 35.5 (d,  $J_{\text{CP}} = 5.6$  Hz), 13.6;

**$^{31}\text{P}$  NMR** (162 MHz,  $\text{CDCl}_3$ )  $\delta$  -7.10;

**HRMS:** calcd. for  $\text{C}_{13}\text{H}_{21}\text{O}_5\text{PNa}$  ( $\text{M}+\text{Na}$ ) $^+$  311.1024; found 311.0998 (TOF MS ES+).

**(4*S*,6*S*)-2-(((2*S*,3*S*,4*S*)-3-((*tert*-butyldimethylsilyl)oxy)-2,4-dimethylhex-5-en-1-yl)oxy)-4,6-divinyl-1,3,2-dioxaphosphinane 2-oxide (13b):**

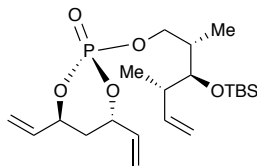

**FTIR** (neat): 2951, 2919, 1491, 1256, 1231, 1109, 1000, 919, 853, 829  $\text{cm}^{-1}$ ;

**Optical Rotation:**  $[\alpha]_{\text{D}} = +37.0$  ( $c = 1.1$ ,  $\text{CHCl}_3$ );

**$^1\text{H NMR}$**  (500 MHz,  $\text{CDCl}_3$ )  $\delta$  6.01 (ddd,  $J = 16.6, 10.6, 5.8$  Hz, 1H), 5.92 (dddd,  $J = 15.9, 10.6, 5.2, 1.5$  Hz, 1H), 5.82 (ddd,  $J = 17.9, 10.2, 8.0$  Hz, 1H), 5.46 (ddd,  $J = 17.2, 1.3, 0.8$  Hz, 1H), 5.38 (dd,  $J = 17.2, 0.9$  Hz, 1H), 5.30 (dd,  $J = 10.6, 0.9$  Hz, 2H), 5.09–5.02 (m, 1H), 5.04–4.97 (m, 2H), 5.01–4.93 (m, 1H), 4.03–3.93 (m, 2H), 3.63 (dd,  $J = 4.5, 3.7$  Hz, 1H), 2.37 (dq,  $J = 14.0, 7.0$  Hz, 1H), 2.18 (dddd,  $J = 14.5, 8.1, 4.8, 1.5$  Hz, 1H), 2.04 (dddd,  $J = 14.3, 5.2, 3.7, 1.7$  Hz, 2H), 1.01 (d,  $J = 7.0$  Hz, 3H), 0.94 (d,  $J = 6.9$  Hz, 3H), 0.90 (s, 9H), 0.06 (s, 6H);

**$^{13}\text{C NMR}$**  (126 MHz,  $\text{CDCl}_3$ )  $\delta$  141.2, 135.1 (d,  $J_{\text{CP}} = 3.2$  Hz), 135.0 (d,  $J_{\text{CP}} = 7.1$  Hz), 117.9, 117.5, 114.6, 77.4 (d,  $J_{\text{CP}} = 6.7$  Hz), 76.1 (d,  $J_{\text{CP}} = 6.1$  Hz), 75.3, 70.6 (d,  $J_{\text{CP}} = 6.0$  Hz), 42.5, 38.0 (d,  $J_{\text{CP}} = 6.7$  Hz), 35.1 (d,  $J_{\text{CP}} = 7.6$  Hz), 26.0, 18.3, 17.3, 11.8, -3.8, -4.1;

**$^{31}\text{P NMR}$**  (162 MHz,  $\text{CDCl}_3$ )  $\delta$  -7.05;

**HRMS:** cald. for  $\text{C}_{21}\text{H}_{39}\text{O}_5\text{PSiNa}$  ( $\text{M}+\text{Na}$ ) $^+$  453.2202; found 453.2189 (TOF MS ES+).

**(1*S*,4*S*,5*S*,6*S*,9*S*,11*S*,*E*)-5-((*tert*-butyldimethylsilyl)oxy)-4,6-dimethyl-11-vinyl-2,12,13-trioxa-1-phosphabicyclo[7.3.1]tridec-7-ene 1-oxide (14b):**

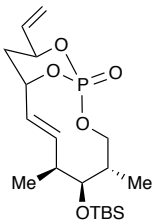

**FTIR** (neat): 2956, 2929, 1471, 1276, 1257, 1103, 1001, 927, 862, 837  $\text{cm}^{-1}$ ;

**Optical Rotation:**  $[\alpha]_{\text{D}} = +36.5$  ( $c = 3.75$ ,  $\text{CHCl}_3$ );

**$^1\text{H NMR}$**  (500 MHz,  $\text{CDCl}_3$ )  $\delta$  6.22 (dd,  $J = 15.5, 9.7$  Hz, 1H), 5.87 (dddd,  $J = 17.4, 9.9, 4.8, 1.8$  Hz, 1H), 5.75 (dd,  $J = 16.0, 4.7$  Hz, 1H), 5.45 (ddd,  $J = 17.0, 1.2, 1.0$  Hz, 1H), 5.27 (d,  $J = 10.6$  Hz, 1H), 5.18–5.04 (m, 2H), 4.34 (s, 1H), 3.91 (dd,  $J = 11.2, 6.6$  Hz, 1H), 3.68 (dd,  $J = 5.9, 2.1$  Hz, 1H), 2.49 (s, 1H), 2.22 (ddd,  $J = 14.6, 12.2, 5.2$  Hz, 1H), 2.10–1.96 (m, 1H), 1.81 (dd,  $J = 14.5, 1.5$  Hz, 1H), 1.09 (d,  $J = 6.9$  Hz, 3H), 1.01 (d,  $J = 7.4$  Hz, 3H), 0.92 (s, 9H), 0.08 (s, 3H), 0.03 (s, 3H);

**$^{13}\text{C NMR}$**  (126 MHz,  $\text{CDCl}_3$ )  $\delta$  135.4 (d,  $J_{\text{CP}} = 10.0$  Hz), 127.1, 116.9, 80.0, 77.2 (d,  $J_{\text{CP}} = 6.1$  Hz), 76.1 (d,  $J_{\text{CP}} = 6.5$  Hz), 75.1 (d,  $J_{\text{CP}} = 7.0$  Hz), 70.6 (d,  $J_{\text{CP}} = 5.9$  Hz), 42.5, 39.5, 35.6 (d,  $J_{\text{CP}} = 5.7$  Hz), 29.6, 26.0, 25.9, 18.1, -4.2, -4.8;

<sup>31</sup>P NMR (162 MHz, CDCl<sub>3</sub>) δ -7.16;

HRMS: cald. for C<sub>19</sub>H<sub>35</sub>O<sub>5</sub>PSiNa (M+Na)<sup>+</sup> 425.1889; found 425.1885 (TOF MS ES+).

**(4*S*,6*S*)-2-(((2*S*,3*S*,4*S*)-3-(methoxymethoxy)-2,4-dimethylhex-5-en-1-yl)oxy)-4,6-divinyl-1,3,2-dioxaphosphinane 2-oxide (13c):**

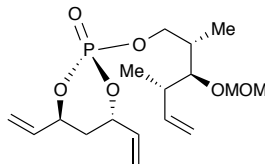

FTIR (neat): 2961, 2926, 1456, 1221, 1076, 1006, 939 cm<sup>-1</sup>;

Optical Rotation: [α]<sub>D</sub> = +65.7 (*c* = 1.0, CHCl<sub>3</sub>);

<sup>1</sup>H NMR (500 MHz, CDCl<sub>3</sub>) δ 6.03 (ddd, *J* = 16.6, 10.6, 5.7 Hz, 1H), 5.91 (ddd, *J* = 15.9, 10.6, 5.2 Hz, 1H), 5.81 (ddd, *J* = 17.7, 10.0, 8.6, 1H), 5.46 (dd, *J* = 17.1, 0.5 Hz, 1H), 5.38 (d, *J* = 17.2 Hz, 1H), 5.30 (ddd, *J* = 10.6, 5.6, 0.5 Hz, 2H), 5.09–4.98 (m, 2H), 5.06 (d, *J* = 17.3 Hz, 1H), 5.01 (d, *J* = 8.3 Hz, 1H), 4.60 (s, 2H), 4.01 (t, *J* = 6.6 Hz, 2H), 3.42 (dd, *J* = 6.6, 3.0 Hz, 1H), 3.36 (d, *J* = 0.6, 3H), 2.48–2.39 (m, 1H), 2.21–2.14 (m, 1H), 2.13–2.00 (m, 2H), 1.01 (d, *J* = 6.9, 3H), 0.95 (d, *J* = 6.9, 3H);

<sup>13</sup>C NMR (126 MHz, CDCl<sub>3</sub>) δ 141.2, 135.1, 135.1 (d, *J*<sub>CP</sub> = 4.8 Hz), 117.9, 117.3, 114.8, 98.2, 82.4, 77.7 (d, *J*<sub>CP</sub> = 6.8 Hz), 76.0 (d, *J*<sub>CP</sub> = 6.1 Hz), 70.0 (d, *J*<sub>CP</sub> = 5.9 Hz), 56.0, 41.1, 36.3 (d, *J*<sub>CP</sub> = 7.3 Hz), 35.1 (d, *J*<sub>CP</sub> = 7.6 Hz), 17.2, 10.8;

<sup>31</sup>P NMR (162 MHz, CDCl<sub>3</sub>) δ -7.02;

HRMS: cald. for C<sub>17</sub>H<sub>29</sub>O<sub>6</sub>PNa (M+Na)<sup>+</sup> 383.1599; found 383.1571 (TOF MS ES+).

**(1*S*,4*S*,5*S*,6*S*,9*S*,11*S*,*E*)-5-(methoxymethoxy)-4,6-dimethyl-11-vinyl-2,12,13-trioxa-1-phosphabicyclo[7.3.1]tridec-7-ene 1-oxide (14c):**

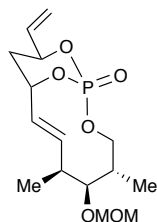

FTIR (neat): 2964, 2929, 2904, 1451, 1226, 1091, 1016, 927 cm<sup>-1</sup>;

Optical Rotation: [α]<sub>D</sub> = +40.0 (*c* = 0.43, CHCl<sub>3</sub>);

<sup>1</sup>H NMR (500 MHz, CDCl<sub>3</sub>) δ 6.18 (ddd, *J* = 16.1, 8.7, 1.3 Hz, 1H), 5.89 (ddd, *J* = 9.9, 4.8, 1.8 Hz, 1H), 5.81 (dd, *J* = 16.2, 4.8 Hz, 1H), 5.45 (dd, *J* = 17.1, 0.9 Hz, 1H), 5.28 (d, *J* = 10.6 Hz, 1H), 5.18–5.07 (m, 2H), 4.68 (s, 2H), 4.26 (s, 1H), 3.95 (dd, *J* = 11.1, 5.4 Hz, 1H), 3.52 (dd, *J* = 7.1, 3.0 Hz, 1H), 3.39 (s, 3H), 2.70 (s, 1H), 2.22 (ddd, *J* = 14.6, 12.2, 5.2 Hz, 1H), 2.15 (s, 1H), 1.83 (d, *J* = 14.6 Hz, 1H), 1.14 (d, *J* = 7.0 Hz, 3H), 1.07 (d, *J* = 7.2 Hz, 3H);

<sup>13</sup>C NMR (126 MHz, CDCl<sub>3</sub>) δ 140.2, 135.3 (d, *J*<sub>CP</sub> = 10 Hz), 128.7, 127.5, 117.0 (d, *J*<sub>CP</sub> = 0.7 Hz), 96.9, 86.0, 77.2 (d, *J*<sub>CP</sub> = 6.2 Hz), 76.2 (d, *J*<sub>CP</sub> = 6.3 Hz), 75.1 (d, *J*<sub>CP</sub> = 7.0 Hz), 60.4, 55.9, 35.5, 21.0, 14.2;

<sup>31</sup>P NMR (162 MHz, CDCl<sub>3</sub>) δ -7.01;

HRMS: calcd. for C<sub>15</sub>H<sub>25</sub>O<sub>6</sub>PNa (M+Na)<sup>+</sup> 355.1286; found 355.1280 (TOF MS ES+).

**(4*R*,6*R*)-2-(((2*S*,3*S*,4*S*)-3-((4-methoxybenzyl)oxy)-2,4-dimethylhex-5-en-1-yl)oxy)-4,6-divinyl-1,3,2-dioxaphosphinane 2-oxide (15):**

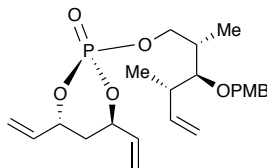

FTIR (neat): 2971, 1651, 1521, 1282, 1249, 1112, 1008, 964, 927, 827 cm<sup>-1</sup>;

Optical Rotation: [α]<sub>D</sub> = -16.4 (c = 1.8, CHCl<sub>3</sub>);

<sup>1</sup>H NMR (500 MHz, CDCl<sub>3</sub>) δ 7.27 (d, *J* = 9.0 Hz, 2H), 6.86 (d, *J* = 8.8 Hz, 2H), 6.05–5.87 (m, 3H), 5.46 (ddd, *J* = 17.1, 1.5, 0.9 Hz, 1H), 5.37 (ddd, *J* = 17.1, 1.5, 0.9 Hz, 1H), 5.29 (dddd, *J* = 10.8, 9.1, 1.1, 1.1 Hz, 2H), 5.11 (ddd, *J* = 17.3, 1.7, 1.4 Hz, 1H), 5.08–5.04 (m, 1H), 5.04 (ddd, *J* = 10.3, 1.6, 1.1 Hz, 1H), 4.98–4.89 (m, 1H), 4.50 (dd, *J* = 31.2, 10.5 Hz, 2H), 4.28–4.07 (m, 2H), 3.80 (s, 3H), 3.27 (dd, *J* = 6.9, 4.9 Hz, 1H), 2.52–2.42 (m, 1H), 2.16 (dddd, *J* = 14.0, 7.7, 4.7, 1.5 Hz, 1H), 2.10–2.00 (m, 2H), 1.06 (d, *J* = 7.0 Hz, 3H), 1.05 (d, *J* = 7.1 Hz, 3H);

<sup>13</sup>C NMR (126 MHz, CDCl<sub>3</sub>) δ 159.1, 142.1, 135.1 (d, *J*<sub>CP</sub> = 3.5 Hz), 135.0 (d, *J*<sub>CP</sub> = 6.8 Hz), 130.74, 129.3, 117.8, 117.5, 114.3, 113.7, 83.8, 77.3 (d, *J*<sub>CP</sub> = 4.1 Hz), 76.1 (d, *J*<sub>CP</sub> = 6.1 Hz), 74.3, 70.1 (d, *J*<sub>CP</sub> = 6.1 Hz), 55.2, 40.1, 37.0 (d, *J*<sub>CP</sub> = 7.6 Hz), 35.1 (d, *J*<sub>CP</sub> = 7.6 Hz), 14.6, 14.1;

<sup>31</sup>P NMR (162 MHz, CDCl<sub>3</sub>) δ -6.81;

HRMS: calcd. for C<sub>23</sub>H<sub>33</sub>O<sub>6</sub>PNa (M+Na)<sup>+</sup> 459.1912; found 459.1908 (TOF MS ES+).

**(1*R*,4*S*,5*S*,6*S*,9*R*,11*R*,*E*)-5-((4-methoxybenzyl)oxy)-4,6-dimethyl-11-vinyl-2,12,13-trioxa-1-phospha-bicyclo[7.3.1]tridec-7-ene 1-oxide (16):**

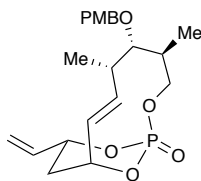

FTIR (neat): 2979, 1659, 1515, 1279, 1239, 1111, 1002, 957, 922, 821 cm<sup>-1</sup>;

Optical Rotation: [α]<sub>D</sub> = -18.5 (c = 0.26, CHCl<sub>3</sub>);

<sup>1</sup>H NMR (500 MHz, CDCl<sub>3</sub>) δ 7.26 (d, *J* = 8.0 Hz, 2H), 6.84 (d, *J* = 8.7 Hz, 2H), 5.88–5.77 (m, 2H), 5.73 (dd, *J* = 15.8, 3.9 Hz, 1H), 5.36 (d, *J* = 17.0 Hz, 1H), 5.24 (d, *J* = 10.5 Hz, 1H), 5.12 (ddd, *J* = 24.4, 5.1, 3.8 Hz, 1H), 5.04 (d, *J* = 7.6 Hz, 1H), 4.51 (d, *J* = 10.7 Hz, 1H), 4.40 (d, *J* = 10.7, 1H), 4.18 (dd, *J* = 10.4, 8.5 Hz, 1H), 3.90 (dd, *J* = 11.0, 6.6 Hz, 1H), 3.82 (s, 3H), 3.11 (d, *J* = 7.2, 1H), 2.55 (br.s, 1H), 2.33 (br.s, 1H), 2.20 (ddd, *J* = 14.5, 12.2, 5.3 Hz, 1H), 1.78 (d, *J* = 14.4 Hz, 1H), 1.12 (d, *J* = 6.6 Hz, 3H), 1.07 (d, *J* = 7.3 Hz, 3H);

$^{13}\text{C}$  NMR (126 MHz,  $\text{CDCl}_3$ )  $\delta$  159.3, 139.0, 135.3 (d,  $J_{\text{CP}} = 9.9$  Hz), 130.2, 129.5, 127.0, 117.0, 113.8, 87.4, 77.2 (d,  $J_{\text{CP}} = 6.1$  Hz), 76.4 (d,  $J_{\text{CP}} = 6.4$  Hz), 75.3 (d,  $J_{\text{CP}} = 6.0$  Hz), 72.0, 65.7, 55.3, 35.6 (d,  $J_{\text{CP}} = 3.2$  Hz), 35.5, 34.60 (d,  $J_{\text{CP}} = 8.9$  Hz), 17.9;

$^{31}\text{P}$  NMR (162 MHz,  $\text{CDCl}_3$ )  $\delta$  -8.02;

**HRMS:** calcd. for  $\text{C}_{21}\text{H}_{29}\text{O}_6\text{PNa}$  ( $\text{M}+\text{Na}$ ) $^+$  431.1599; found 431.1605 (TOF MS ES+).

**(4*S*,6*S*)-2-(((*R*)-1-(benzyloxy)but-3-en-2-yl)oxy)-4,6-divinyl-1,3,2-dioxaphosphinane 2-oxide (18):**

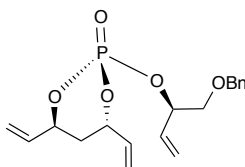

**FTIR** (neat): 2924, 2856, 1454, 1281, 1009, 741  $\text{cm}^{-1}$ ;

**Optical Rotation:**  $[\alpha]_{\text{D}} = +47.6$  ( $c = 0.38$ ,  $\text{CHCl}_3$ );

$^1\text{H}$  NMR (400 MHz,  $\text{CDCl}_3$ )  $\delta$  7.37–7.26 (m, 5H), 6.05 (ddd,  $J = 16.9, 10.6, 6.0$  Hz, 1H), 5.99–5.85 (m, 1H), 5.94 (ddd,  $J = 17.1, 10.6, 6.5$  Hz, 1H), 5.46 (d,  $J = 6.7$  Hz, 1H), 5.42 (d,  $J = 6.8$  Hz, 1H), 5.37 (d,  $J = 17.1$  Hz, 1H), 5.32 (d,  $J = 4.6$  Hz, 1H), 5.29 (d,  $J = 4.6$  Hz, 1H), 5.26 (d,  $J = 10.6$  Hz, 1H), 5.11–4.95 (m, 3H), 4.62 (d,  $J = 12.1$  Hz, 1H), 4.57 (d,  $J = 12.1$  Hz, 1H), 3.71–3.61 (m, 2H), 2.12 (dddd,  $J = 16.4, 14.8, 10.8, 5.2, 1.7$  Hz, 2H);

$^{13}\text{C}$  NMR (126 MHz,  $\text{CDCl}_3$ )  $\delta$  137.9 (s), 135.2 (d,  $J_{\text{CP}} = 3.3$  Hz), 135.0 (s), 135.0 (s), 133.8 (d,  $J_{\text{CP}} = 4.1$  Hz), 128.3, 127.6, 118.7, 117.8, 117.4, 78.2 (d,  $J_{\text{CP}} = 5.6$  Hz), 77.9 (d,  $J_{\text{CP}} = 6.7$  Hz), 76.0 (d,  $J_{\text{CP}} = 6.1$  Hz), 73.2, 72.2 (d,  $J_{\text{CP}} = 5.9$  Hz), 35.2 (d,  $J_{\text{CP}} = 7.7$  Hz);

$^{31}\text{P}$  NMR (162 MHz,  $\text{CDCl}_3$ )  $\delta$  -8.23;

**HRMS:** calcd. for  $[\text{C}_{18}\text{H}_{23}\text{O}_5\text{P}]_2\text{Na}$  ( $2\text{M}+\text{Na}$ ) $^+$  723.2464; found 723.2456 (TOF MS ES+).

**(1*S*,3*R*,6*S*,8*S*)-3-((benzyloxy)methyl)-8-vinyl-2,9,10-trioxa-1-phospha-bicyclo[4.3.1]dec-4-ene 1-oxide (trans-19):**

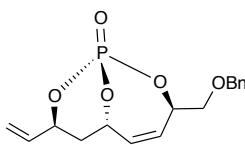

**FTIR** (neat): 2924, 2866, 1454, 1300, 1086, 741  $\text{cm}^{-1}$ ;

**Optical Rotation:**  $[\alpha]_{\text{D}} = +146.0$  ( $c = 0.49$ ,  $\text{CHCl}_3$ );

$^1\text{H}$  NMR (400 MHz,  $\text{CDCl}_3$ )  $\delta$  7.42–7.28 (m, 5H), 6.02 (ddd,  $J = 12.3, 5.9, 1.8$  Hz, 1H), 5.86 (dddd,  $J = 17.1, 10.5, 5.2, 1.7$  Hz, 1H), 5.66 (dd,  $J = 12.5, 4.4$  Hz, 1H), 5.44 (d,  $J = 17.1$  Hz, 1H), 5.28 (d,  $J = 10.6$  Hz, 1H), 5.15 (ddd,  $J = 24.6, 4.2, 4.2$  Hz, 1H), 5.02 (dd,  $J = 11.6, 4.6$  Hz, 1H), 4.92 (ddd,  $J = 29.2, 12.5, 6.0$  Hz, 1H), 4.71 (d,  $J = 12.0$  Hz, 1H), 4.60 (d,  $J = 12.0$  Hz, 1H), 4.06 (dd,  $J = 10.3, 7.0$  Hz, 1H), 3.84 (dd,  $J = 10.3, 5.9$  Hz, 1H), 2.26 (ddd,  $J = 14.5, 11.9, 6.1$  Hz, 1H), 1.79 (d,  $J = 14.6$  Hz, 1H);



<sup>13</sup>C NMR (126 MHz, CDCl<sub>3</sub>) δ 137.6, 134.7 (d, *J*<sub>CP</sub> = 10.4 Hz), 129.8, 128.9, 128.4, 127.9, 127.8, 117.5, 76.3 (d, *J*<sub>CP</sub> = 7.8 Hz), 75.9 (d, *J*<sub>CP</sub> = 6.6 Hz), 75.8 (d, *J*<sub>CP</sub> = 6.8 Hz), 73.7, 72.0, 34.4 (d, *J*<sub>CP</sub> = 5.7 Hz);

<sup>31</sup>P NMR (162 MHz, CDCl<sub>3</sub>) δ -7.86;

HRMS: cald. for [C<sub>16</sub>H<sub>19</sub>O<sub>5</sub>P]<sub>2</sub>Na (2M+Na)<sup>+</sup> 667.1838; found 667.1848 (TOF MS ES+).

**(4*R*,6*R*)-2-(((*R*)-1-(benzyloxy)but-3-en-2-yl)oxy)-4,6-divinyl-1,3,2-dioxaphosphinane 2-oxide (20):**

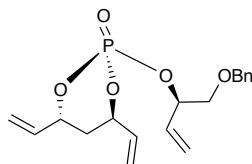

FTIR (neat): 3085, 2922, 1427, 1285, 1007, 739 cm<sup>-1</sup>;

Optical Rotation: [α]<sub>D</sub> = -53.9 (*c* = 1.7, CHCl<sub>3</sub>);

<sup>1</sup>H NMR (400 MHz, CDCl<sub>3</sub>) δ 7.36–7.27 (m, 5H), 6.09 (dddd, *J* = 17.1, 10.6, 6.4, 0.8 Hz, 1H), 5.91 (ddd, *J* = 17.0, 10.7, 6.2 Hz, 1H), 5.82 (dddd, *J* = 17.3, 10.6, 5.2, 1.7 Hz, 1H), 5.46 (ddd, *J* = 17.2, 1.2, 1.2 Hz, 1H), 5.38 (ddd, *J* = 4.7, 1.0, 1.0 Hz, 1H), 5.34 (ddd, *J* = 4.7, 1.1, 1.1 Hz, 1H), 5.31 (d, *J* = 10.9 Hz, 1H), 5.28 (ddd, *J* = 10.8, 1.0, 1.0 Hz, 1H), 5.23 (ddd, *J* = 10.7, 1.0, 1.0 Hz, 1H), 5.10 – 4.97 (m, 3H), 4.61 (d, *J* = 11.9 Hz, 1H), 4.54 (d, *J* = 11.9 Hz, 1H), 3.64–3.61 (m, 2H), 2.12 (dddd, *J* = 14.5, 8.0, 4.9, 1.6 Hz, 1H), 2.03 (dddd, *J* = 14.8, 5.5, 3.7, 1.8 Hz, 1H);

<sup>13</sup>C NMR (126 MHz, CDCl<sub>3</sub>) δ 137.7, 135.2, 135.2 (d, *J*<sub>CP</sub> = 4.8 Hz), 133.4 (d, *J*<sub>CP</sub> = 4.0 Hz), 128.4, 127.8, 127.7, 118.6, 118.0, 117.1, 78.2 (d, *J*<sub>CP</sub> = 6.8 Hz), 77.8 (d, *J*<sub>CP</sub> = 5.5 Hz), 75.9 (d, *J*<sub>CP</sub> = 6.1 Hz), 73.2 (s), 72.3 (d, *J*<sub>CP</sub> = 5.8 Hz), 35.3 (d, *J*<sub>CP</sub> = 7.7 Hz);

<sup>31</sup>P NMR (162 MHz, CDCl<sub>3</sub>) δ -8.37;

HRMS: cald. for [C<sub>18</sub>H<sub>23</sub>O<sub>5</sub>P]<sub>2</sub>Na (2M+Na)<sup>+</sup> 723.2464; found 723.2400 (TOF MS ES+).

**(1*R*,3*R*,6*R*,8*R*)-3-((benzyloxy)methyl)-8-vinyl-2,9,10-trioxa-1-phosphabicyclo[4.3.1]dec-4-ene 1-oxide (*cis*-21):**

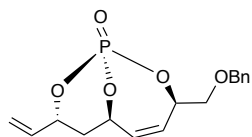

FTIR (neat): 2924, 2854, 1454, 1298, 968, 764 cm<sup>-1</sup>;

Optical Rotation: [α]<sub>D</sub> = -17.6 (*c* = 0.42, CHCl<sub>3</sub>);

<sup>1</sup>H NMR (400 MHz, CDCl<sub>3</sub>) δ 7.41–7.28 (m, 5H), 6.04 (ddd, *J* = 11.9, 2.5, 2.5 Hz, 1H), 5.84 (ddd, *J* = 10.6, 5.9, 2.0 Hz, 1H), 5.61 (ddd, *J* = 11.9, 3.9, 2.4 Hz, 1H), 5.43 (d, *J* = 17.2 Hz, 1H), 5.33–5.27 (m, 1H), 5.27 (d, *J* = 10.6 Hz, 1H), 5.27–5.16 (m, 1H), 5.04 (dd, *J* = 11.9, 5.3 Hz, 1H), 4.64 (dd, *J* = 12.1 Hz, 1H), 4.59 (dd, *J* = 12.1 Hz, 1H), 3.72 (ddd, *J* = 10.2, 5.0, 1.0 Hz, 1H), 3.63 (dd, *J* = 10.3, 6.0 Hz, 1H), 2.23 (ddd, *J* = 14.7, 12.1, 6.2 Hz, 1H), 1.80 (dd, *J* = 14.4, 2.0 Hz, 1H);

<sup>13</sup>C NMR (126 MHz, CDCl<sub>3</sub>) δ 137.5, 134.7 (d, *J*<sub>CP</sub> = 10.4 Hz), 130.1, 129.4, 128.5, 127.9, 127.7, 117.4, 77.1, 76.2 (d, *J*<sub>CP</sub> = 6.0 Hz), 73.5, 72.2 (d, *J*<sub>CP</sub> = 5.9 Hz), 71.2 (d, *J*<sub>CP</sub> = 12.1 Hz), 34.9 (d, *J*<sub>CP</sub> = 5.9 Hz);

<sup>31</sup>P NMR (162 MHz, CDCl<sub>3</sub>) δ -5.74;

HRMS: cald. for [C<sub>16</sub>H<sub>19</sub>O<sub>5</sub>P]<sub>2</sub>Na (2M+Na)<sup>+</sup> 667.1838; found 667.1835 (TOF MS ES+).

**(4*S*,6*S*)-2-((2,4-dimethylpenta-1,4-dien-3-yl)oxy)-4,6-divinyl-1,3,2-dioxaphosphinane 2-oxide (22):**

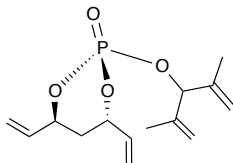

FTIR (thin film): 2922, 1827, 1649, 1448, 1375, 1281, 1140, 1119, 1003, 928 cm<sup>-1</sup>;

Optical Rotation: [α]<sub>D</sub> = +48.40 (*c* = 0.75, CHCl<sub>3</sub>);

<sup>1</sup>H NMR (400 MHz, CDCl<sub>3</sub>) δ 6.02 (ddd, *J* = 16.7, 10.7, 5.5 Hz 1H), 5.90 (dddd, *J* = 17.3, 10.6, 5.1, 1.5 Hz, 1H), 5.45 (d, *J* = 22.0 Hz, 1H), 5.39 (d, *J* = 21.6 Hz, 1H), 5.33–5.27 (m, 2H), 5.20–5.11 (m, 3H), 5.11–5.03 (m, 1H), 5.01 (s, 2H), 4.99–4.92 (m, 1H), 2.17 (dddd, *J* = 12.8, 7.8, 4.8, 1.4 Hz, 1H), 2.07 (dddd, *J* = 14.7, 5.4, 3.7, 1.8 Hz, 1H), 1.66 (s, 6H);

<sup>13</sup>C NMR (126 MHz, CDCl<sub>3</sub>) δ 141.3 (d, *J*<sub>CP</sub> = 4.3 Hz), 141.1 (d, *J*<sub>CP</sub> = 5.3 Hz), 135.2 (d, *J*<sub>CP</sub> = 3.2 Hz), 135.1 (d, *J*<sub>CP</sub> = 7.5 Hz), 117.7, 117.5, 114.4, 113.5, 84.7 (d, *J*<sub>CP</sub> = 5.2 Hz), 77.6 (d, *J*<sub>CP</sub> = 6.8 Hz), 76.0 (d, *J*<sub>CP</sub> = 6.1 Hz), 35.1 (d, *J*<sub>CP</sub> = 7.7 Hz), 18.0, 17.4;

<sup>31</sup>P NMR (162 MHz, CDCl<sub>3</sub>) δ -8.58;

HRMS cald for C<sub>14</sub>H<sub>21</sub>O<sub>4</sub>PNa (M+Na)<sup>+</sup> 307.1075; found 307.1067 (TOF MS ES+).

**(1*S*,3*R*,6*S*,8*S*)-4-methyl-3-(prop-1-en-2-yl)-8-vinyl-2,9,10-trioxa-1-phosphabicyclo[4.3.1]dec-4-ene 1-oxide (*cis*-23):**

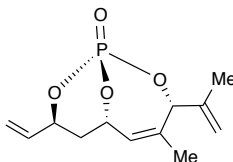

FTIR (thin film): 2922, 1726, 1298, 1026, 966, 768 cm<sup>-1</sup>;

Optical Rotation: [α]<sub>D</sub> = + 103.14(*c* = 0.17, CHCl<sub>3</sub>);

<sup>1</sup>H NMR (500 MHz, CDCl<sub>3</sub>) δ 5.89 (dddd, *J* = 17.2, 10.8, 5.1, 2.1 Hz 1H), 5.59 (d, *J* = 5.3 Hz, 1H), 5.45 (d, *J* = 17.2 Hz, 1H), 5.43–5.39 (m, 1H), 5.28 (d, *J* = 10.7 Hz, 1H), 5.12 (d, *J* = 21.5 Hz, 1H), 5.09–5.03 (m, 3H), 2.19 (ddd, *J* = 14.5, 12.1, 6.2 Hz, 1H), 1.93–1.81 (m, 1H), 1.79 (s, 3H), 1.75 (s, 3H);

<sup>13</sup>C NMR (126 MHz, CDCl<sub>3</sub>) δ 141.1 (d, *J*<sub>CP</sub> = 10.1 Hz), 138.1, 135.0 (d, *J*<sub>CP</sub> = 10.2 Hz), 124.9, 117.1 (d, *J*<sub>CP</sub> = 1.0 Hz), 116.6, 80.6 (d, *J*<sub>CP</sub> = 5.7 Hz), 76.7 (d, *J*<sub>CP</sub> = 6.2 Hz), 76.5 (d, *J*<sub>CP</sub> = 6.2 Hz), 35.3 (d, *J*<sub>CP</sub> = 6.2 Hz), 22.2, 17.5;

<sup>31</sup>P NMR (162 MHz, CDCl<sub>3</sub>) δ (ppm) -5.91;

HRMS cald for (C<sub>12</sub>H<sub>17</sub>O<sub>4</sub>P)<sub>2</sub>Na(2M+Na)<sup>+</sup> 535.1627; found 536.1624 (TOF MS ES+).

**(4*S*,6*S*)-2-(((*R*)-1-(benzyloxy)pent-4-en-2-yl)oxy)-4,6-divinyl-1,3,2-dioxaphosphinane 2-oxide (26):**

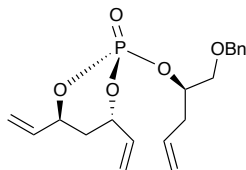

**FTIR** (neat): 2924, 2858, 1454, 1283, 1007, 739  $\text{cm}^{-1}$ ;

**Optical Rotation:**  $[\alpha]_{\text{D}} = +37.9$  ( $c = 0.33$ ,  $\text{CHCl}_3$ );

**$^1\text{H}$  NMR** (400 MHz,  $\text{CDCl}_3$ )  $\delta$  7.36–7.27 (m, 5H), 6.04 (ddd,  $J = 17.2, 10.7, 6.1$  Hz, 1H), 5.90 (dddd,  $J = 17.3, 10.6, 5.2, 1.7$  Hz, 1H), 5.80 (ddt,  $J = 17.2, 10.1, 7.1$  Hz, 1H), 5.45 (ddd,  $J = 17.2, 1.3, 1.3$  Hz, 1H), 5.35 (ddd,  $J = 17.2, 1.3, 1.3$  Hz, 1H), 5.30 (ddd,  $J = 10.6, 1.2, 1.2$  Hz, 1H), 5.23 (ddd,  $J = 10.6, 1.2, 1.2$  Hz, 1H), 5.15 (dd,  $J = 17.1, 1.7$  Hz, 1H), 5.12–5.08 (m, 1H), 5.08–4.96 (m, 2H), 4.71–4.62 (m, 1H), 4.59 (d,  $J = 12.0$  Hz, 1H), 4.54 (d,  $J = 12.0$  Hz, 1H), 3.70–3.59 (m, 2H), 2.62–2.45 (m, 2H), 2.18–2.02 (m, 2H);

**$^{13}\text{C}$  NMR** (126 MHz,  $\text{CDCl}_3$ )  $\delta$  138.0, 135.2 (d,  $J_{\text{CP}} = 3.2$  Hz), 135.1, 135.0, 133.0, 128.3, 127.6, 118.4, 117.8, 117.3, 77.9 (d,  $J_{\text{CP}} = 6.8$  Hz), 77.2, 75.9 (d,  $J_{\text{CP}} = 6.1$  Hz), 73.22, 71.2 (d,  $J_{\text{CP}} = 4.4$  Hz), 36.7 (d,  $J_{\text{CP}} = 4.9$  Hz), 35.2 (d,  $J_{\text{CP}} = 7.6$  Hz);

**$^{31}\text{P}$  NMR** (162 MHz,  $\text{CDCl}_3$ )  $\delta$  -8.26;

**HRMS:** cald. for  $[\text{C}_{19}\text{H}_{25}\text{O}_5\text{P}]_2\text{Na}$  ( $2\text{M}+\text{Na}$ ) $^+$  751.2777; found 751.2770 (TOF MS ES+).

**(4*S*,6*S*)-2-(((*R*)-1-(benzyloxy)-4-methylpent-4-en-2-yl)oxy)-4,6-divinyl-1,3,2-dioxaphosphinane-2-oxide (27):**

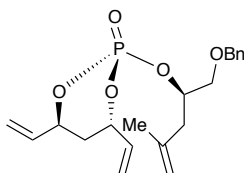

**FTIR** (thin film): 2920, 2359, 1827, 1649, 1454, 1283, 1121, 1097, 999, 929, 739  $\text{cm}^{-1}$ ;

**Optical Rotation:**  $[\alpha]_{\text{D}} = +40.72$  ( $c = 1.04$ ,  $\text{CHCl}_3$ );

**$^1\text{H}$  NMR** (400 MHz,  $\text{CDCl}_3$ )  $\delta$  7.36–7.27 (m, 5H), 6.06 (ddd,  $J = 17.1, 10.6, 6.2$  Hz, 1H), 5.89 (dddd,  $J = 17.2, 10.6, 5.2, 1.7$  Hz, 1H), 5.43 (ddd,  $J = 17.1, 1.3, 1.1$  Hz, 1H), 5.35 (ddd,  $J = 17.2, 1.4, 1.0$  Hz, 1H), 5.28 (dd,  $J = 11.7, 1.1$  Hz, 1H), 5.23 (dd,  $J = 10.6, 1.1$  Hz, 1H), 5.08–4.95 (m, 2H), 4.86–4.80 (m, 2H), 4.80–4.71 (m, 1H), 4.60 (d,  $J = 12.0$  Hz, 1H), 4.55 (d,  $J = 12.0$  Hz, 1H), 3.71–3.63 (m, 2H), 2.53–2.40 (m, 2H), 2.14 (dddd,  $J = 14.6, 8.1, 4.9, 1.5$  Hz, 1H), 2.04 (dddd,  $J = 14.7, 5.4, 3.8, 1.8$  Hz, 1H), 1.77 (s, 3H);

**$^{13}\text{C}$  NMR** (126 MHz,  $\text{CDCl}_3$ )  $\delta$  141.2, 138.1, 135.3 (d,  $J_{\text{CP}} = 3.0$  Hz), 135.2 (d,  $J_{\text{CP}} = 7.8$  Hz), 128.3, 127.7, 127.6 (d,  $J_{\text{CP}} = 5.8$  Hz), 117.9, 117.2, 113.9, 78.1 (d,  $J_{\text{CP}} = 6.9$  Hz), 76.1 (d,  $J_{\text{CP}} = 6.3$  Hz), 75.8 (d,  $J_{\text{CP}} = 6.2$  Hz), 73.3, 71.8 (d,  $J_{\text{CP}} = 3.2$  Hz), 40.9 (d,  $J_{\text{CP}} = 5.8$  Hz), 35.3 (d,  $J_{\text{CP}} = 7.6$  Hz), 22.2;

**$^{31}\text{P}$  NMR** (162 MHz,  $\text{CDCl}_3$ )  $\delta$  -8.20;

**HRMS** cald for  $\text{C}_{20}\text{H}_{27}\text{O}_5\text{PNa}$  ( $\text{M}+\text{Na}$ ) $^+$  401.1494; found 401.1512 (TOF MS ES+).

**(1*S*,3*R*,7*S*,9*S*,*Z*)-3-((benzyloxy)methyl)-9-vinyl-2,10,11-trioxa-1-phosphabicyclo[5.3.1]undec-5-ene 1-oxide**  
**(*trans*-28):**

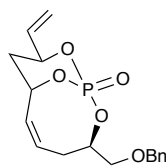

**FTIR** (neat): 2926, 2854, 1454, 1283, 1020, 756  $\text{cm}^{-1}$ ;

**Optical Rotation:**  $[\alpha]_{\text{D}} = +61.8$  ( $c = 0.45$ ,  $\text{CHCl}_3$ );

**$^1\text{H}$  NMR** (400 MHz,  $\text{CDCl}_3$ )  $\delta$  7.38–7.28 (m, 5H), 5.89–5.80 (m, 2H), 5.53 (d,  $J = 11.8$  Hz, 1H), 5.41 (ddd,  $J = 17.0$ , 1.1, 1.1 Hz, 1H), 5.35–5.23 (m, 1H), 5.26 (ddd,  $J = 10.5$ , 0.9, 0.9 Hz, 1H), 5.06–4.99 (m, 1H), 4.67 (d,  $J = 11.9$  Hz, 1H), 4.58 (d,  $J = 11.9$  Hz, 1H), 4.16 (dddd,  $J = 30.8$ , 13.0, 6.4, 3.3 Hz, 1H), 4.07 (dd,  $J = 9.7$ , 6.1 Hz, 1H), 3.74 (dd,  $J = 9.8$ , 6.4 Hz, 1H), 3.17–3.07 (m, 1H), 2.36 (ddd,  $J = 14.0$ , 8.7, 2.9 Hz, 1H), 2.20 (ddd,  $J = 14.5$ , 11.9, 6.0 Hz, 1H), 1.81 (ddd,  $J = 14.5$ , 3.7, 1.9 Hz, 1H);

**$^{13}\text{C}$  NMR** (126 MHz,  $\text{CDCl}_3$ )  $\delta$  137.9, 135.0 (d,  $J_{\text{CP}} = 10.2$  Hz), 131.2, 128.4, 127.8, 127.7, 126.8, 117.2 (d,  $J_{\text{CP}} = 1.4$  Hz), 78.3 (d,  $J_{\text{CP}} = 7.2$  Hz), 76.9 (d,  $J_{\text{CP}} = 6.0$  Hz), 76.0 (d,  $J_{\text{CP}} = 5.9$  Hz), 73.6, 72.2, 36.0 (d,  $J_{\text{CP}} = 6.4$  Hz), 29.5;

**$^{31}\text{P}$  NMR** (162 MHz,  $\text{CDCl}_3$ )  $\delta$  -10.79;

**HRMS:** cald. for  $[\text{C}_{17}\text{H}_{21}\text{O}_5\text{P}]_2\text{Na}$  ( $2\text{M}+\text{Na}$ ) $^+$  695.2151; found 695.2125 (TOF MS ES+).

**(1*S*,3*R*,7*S*,9*S*,*Z*)-3-((benzyloxy)methyl)-5-methyl-9-vinyl-2,10,11-trioxa-1-phosphabicyclo[5.3.1]undec-5-ene 1-oxide**  
**(*trans*-29):**

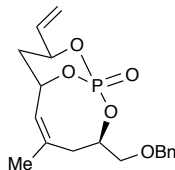

**FTIR** (thin film): 2918, 2849, 1718, 1582, 1364, 1333, 1283, 1126, 1090, 1001, 901  $\text{cm}^{-1}$ ;

**Optical Rotation:**  $[\alpha]_{\text{D}} = +24.51$  ( $c = 0.16$ ,  $\text{CHCl}_3$ );

**$^1\text{H}$  NMR** (500 MHz,  $\text{CDCl}_3$ )  $\delta$  7.41–7.27 (m, 5H), 5.84 (dddd,  $J = 17.2$ , 10.6, 5.4, 2.1 Hz, 1H), 5.42 (ddd,  $J = 17.1$ , 5.8, 4.6 Hz, 1H), 5.34–5.16 (m, 2H), 5.24 (m, ddd,  $J = 10.7$ , 1.2, 1.1 Hz, 1H), 5.02 (dd,  $J = 11.7$ , 5.4 Hz, 1H), 4.68 (dd,  $J = 11.9$ , 4.3 Hz, 1H), 4.60 (dd,  $J = 11.9$ , 5.1 Hz, 1H), 4.08 (dd,  $J = 10.0$ , 6.2 Hz, 1H), 3.75 (dd,  $J = 10.0$ , 6.5 Hz, 1H), 3.38–3.26 (m, 1H), 2.21–2.14 (m, 1H), 2.09 (dd,  $J = 13.9$ , 3.1 Hz, 1H), 1.92–1.89 (m, 1H), 1.88 (dd,  $J = 2.4$ , 1.4 Hz, 3H), 1.76 (ddd,  $J = 14.5$ , 3.9, 1.9 Hz, 1H);

**$^{13}\text{C}$  NMR** (126 MHz,  $\text{CDCl}_3$ )  $\delta$  137.9, 135.5, 128.8, 128.4, 127.9, 127.7, 124.6, 117.2, 77.6 (d,  $J_{\text{CP}} = 7.4$  Hz), 75.3 (d,  $J_{\text{CP}} = 5.8$  Hz), 73.7, 72.3, 36.7 (d,  $J_{\text{CP}} = 6.6$  Hz), 34.7, 34.1, 29.7.

**$^{31}\text{P}$  NMR** (162 MHz,  $\text{CDCl}_3$ )  $\delta$  (ppm) -10.34;

**HRMS** cald for  $\text{C}_{18}\text{H}_{23}\text{O}_5\text{PNa}$  ( $\text{M}+\text{Na}$ ) $^+$  373.1181; found 373.1176 (TOF MS ES+).

**(4*R*,6*R*)-2-(((*R*)-1-(benzyloxy)but-3-en-2-yl)oxy)-4,6-divinyl-1,3,2-dioxaphosphinane 2-oxide (30):**

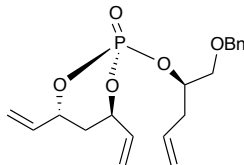

**FTIR** (neat): 2924, 2862, 1454, 1283, 1004, 740  $\text{cm}^{-1}$ ;

**Optical Rotation:**  $[\alpha]_{\text{D}} = -57.6$  ( $c = 0.46$ ,  $\text{CHCl}_3$ );

**$^1\text{H}$  NMR** (400 MHz,  $\text{CDCl}_3$ )  $\delta$  7.38–7.26 (m, 5H), 6.08 (ddd,  $J = 17.0, 10.6, 6.2$  Hz, 1H), 5.87–5.74 (m, 2H), 5.36 (d,  $J = 11.0$  Hz, 1H), 5.32 (d,  $J = 11.0$  Hz, 1H), 5.28 (d,  $J = 10.6$  Hz, 1H), 5.22 (d,  $J = 10.6$  Hz, 1H), 5.13 (dd,  $J = 17.03, 1.6$  Hz, 1H), 5.10 (d,  $J = 9.8$ , 1H), 5.07–4.96 (m, 2H), 4.68–4.60 (m, 1H), 4.58 (d,  $J = 11.8$  Hz, 1H), 4.50 (d,  $J = 11.8$  Hz, 1H), 3.65–3.55 (m, 2H), 2.60–2.47 (m, 2H), 2.09 (ddd,  $J = 8.1, 4.9, 1.6$  Hz, 1H), 2.01 (dddd,  $J = 14.7, 5.4, 3.9, 1.9$  Hz, 1H).

**$^{13}\text{C}$  NMR** (126 MHz,  $\text{CDCl}_3$ )  $\delta$  137.8, 135.2 (d,  $J_{\text{CP}} = 6.4$  Hz), 135.2 (d,  $J_{\text{CP}} = 1.0$  Hz), 132.7, 128.3, 127.7, 127.7, 118.4, 117.9, 117.0, 78.1 (d,  $J_{\text{CP}} = 6.8$  Hz), 77.0 (d,  $J_{\text{CP}} = 6.3$  Hz), 75.7 (d,  $J_{\text{CP}} = 6.0$  Hz), 73.2, 71.3 (d,  $J_{\text{CP}} = 4.9$  Hz), 36.7 (d,  $J_{\text{CP}} = 4.3$  Hz), 35.3 (d,  $J_{\text{CP}} = 7.6$  Hz);

**$^{31}\text{P}$  NMR** (162 MHz,  $\text{CDCl}_3$ )  $\delta$  -8.19;

**HRMS:** cald. for  $[\text{C}_{19}\text{H}_{25}\text{O}_5\text{P}]_2\text{Na}$  ( $2\text{M}+\text{Na}$ ) $^+$  751.2777; found 751.2760 (TOF MS ES+).

**(4*R*,6*R*)-2-(((*R*)-1-(benzyloxy)-4-methylpent-4-en-2-yl)oxy)-4,6-divinyl-1,3,2-dioxaphosphinane 2-oxide (31):**

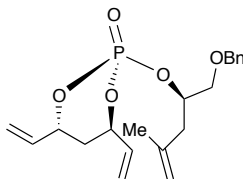

**FTIR** (thin film): 2924, 1827, 1645, 1454, 1285, 1120, 1003, 926  $\text{cm}^{-1}$ ;

**Optical Rotation:**  $[\alpha]_{\text{D}} = -53.0$  ( $c = 2.61$ ,  $\text{CHCl}_3$ );

**$^1\text{H}$  NMR** (400 MHz,  $\text{CDCl}_3$ )  $\delta$  7.35–7.28 (m, 5H), 6.08 (dddd,  $J = 17.2, 10.6, 6.3, 0.8$  Hz, 1H), 5.82 (dddd,  $J = 17.4, 10.6, 5.2, 1.7$  Hz, 1H), 5.37 (ddd,  $J = 7.4, 1.4, 1.2$  Hz, 1H), 5.32 (ddd,  $J = 7.2, 1.4, 1.1$  Hz, 1H), 5.27 (ddd,  $J = 10.5, 1.2, 1.0$  Hz, 1H), 5.22 (ddd,  $J = 10.6, 1.3, 1.1$  Hz, 1H), 5.06–4.97 (m, 2H), 4.86–4.78 (m, 2H), 4.77–4.71 (m, 1H), 4.58 (d,  $J = 11.9$  Hz, 1H), 4.52 (d,  $J = 11.8$  Hz, 1H), 3.66 (ddd,  $J = 10.7, 3.5, 1.7$  Hz, 1H), 3.58 (dd,  $J = 10.7, 5.8$  Hz, 1H), 2.55 (dd,  $J = 14.2, 6.6$  Hz, 1H), 2.43 (dd,  $J = 14.1, 7.1$  Hz, 1H), 2.10 (dddd,  $J = 14.4, 8.0, 4.8, 1.6$  Hz, 1H), 2.01 (dddd,  $J = 14.7, 5.5, 3.9, 1.8$  Hz, 1H), 1.79 (s, 3H);

**$^{13}\text{C}$  NMR** (126 MHz,  $\text{CDCl}_3$ )  $\delta$  140.9, 137.9, 135.3, 135.3 (d,  $J_{\text{CP}} = 3.0$  Hz), 128.3, 127.8, 127.7 (d,  $J_{\text{CP}} = 5.4$  Hz), 117.8, 117.0, 114.0, 78.1 (d,  $J_{\text{CP}} = 6.8$  Hz), 76.1 (d,  $J_{\text{CP}} = 6.1$  Hz), 75.71 (d,  $J_{\text{CP}} = 6.0$  Hz), 73.3, 71.6 (d,  $J_{\text{CP}} = 4.3$  Hz), 40.6 (d,  $J_{\text{CP}} = 4.8$  Hz), 35.3 (d,  $J_{\text{CP}} = 7.6$  Hz), 22.6;

**$^{31}\text{P}$  NMR** (162 MHz,  $\text{CDCl}_3$ )  $\delta$  -8.09;

**HRMS** cald for  $\text{C}_{20}\text{H}_{27}\text{O}_5\text{PNa}$  ( $\text{M}+\text{Na}$ ) $^+$  401.1494; found 401.1479 (TOF MS ES+).

**(1R,3R,7R,9R,Z)-3-((benzyloxy)methyl)-9-vinyl-2,10,11-trioxa-1-phosphabicyclo[5.3.1]undec-5-ene 1-oxide**  
**(cis-32):**

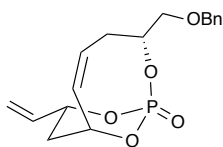

**FTIR** (neat): 2924, 2854, 1454, 1292, 1018, 743  $\text{cm}^{-1}$ ;

**Optical Rotation:**  $[\alpha]_{\text{D}} = +3.5$  ( $c = 0.46$ ,  $\text{CHCl}_3$ );

**$^1\text{H}$  NMR** (400 MHz,  $\text{CDCl}_3$ )  $\delta$  7.40–7.28 (m, 5H), 5.84 (dddd,  $J = 17.1, 10.7, 5.3, 2.1$  Hz, 1H), 5.73 (ddd,  $J = 20.5, 8.7, 2.8$  Hz, 1H), 5.50 (dd,  $J = 11.8, 1.8$  Hz, 1H), 5.41 (dd,  $J = 17.2, 1.3$  Hz, 1H), 5.34–5.23 (m, 1H), 5.26 (dd,  $J = 10.7, 1.0$  Hz, 1H), 5.03 (dd,  $J = 11.9, 5.0$  Hz, 1H), 4.73 (ddd,  $J = 12.7, 6.8, 2.3$  Hz, 1H), 4.59 (d,  $J = 12.0$  Hz, 1H), 4.54 (d,  $J = 12.0$  Hz, 1H), 3.55 (dd,  $J = 10.0, 5.4$  Hz, 1H), 3.45 (ddd,  $J = 9.9, 7.1, 0.7$  Hz, 1H), 3.38–3.29 (m, 1H), 2.38 (dd,  $J = 14.1, 8.7$  Hz, 1H), 2.19 (ddd,  $J = 14.6, 12.0, 5.9$  Hz, 1H), 1.81 (dd,  $J = 14.6, 1.9$  Hz, 1H);

**$^{13}\text{C}$  NMR** (126 MHz,  $\text{CDCl}_3$ )  $\delta$  137.7, 135.0 (d,  $J_{\text{CP}} = 10.0$  Hz), 131.2, 128.4, 127.8, 127.6, 125.3, 117.2 (d,  $J_{\text{CP}} = 1.3$  Hz), 78.3 (d,  $J_{\text{CP}} = 7.1$  Hz), 77.1 (d,  $J_{\text{CP}} = 6.1$  Hz), 73.2, 72.4 (d,  $J_{\text{CP}} = 4.8$  Hz), 70.4 (d,  $J_{\text{CP}} = 15.1$  Hz), 36.2 (d,  $J_{\text{CP}} = 6.5$  Hz), 27.4;

**$^{31}\text{P}$  NMR** (162 MHz,  $\text{CDCl}_3$ )  $\delta$  -9.29;

**HRMS:** cald. for  $[\text{C}_{17}\text{H}_{21}\text{O}_5\text{P}]_2\text{Na}$  ( $2\text{M}+\text{Na}$ ) $^+$  695.2151; found 695.2162 (TOF MS ES+).

**(4R,6R)-2-(((1R,2S)-2-methyl-1-(4-nitrophenyl)but-3-en-1-yl)oxy)-4,6-divinyl-1,3,2-dioxaphosphinane 2-oxide**  
**(36):**

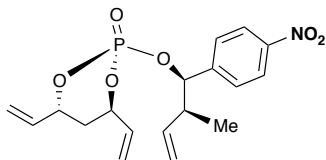

**FTIR** (neat): 3080, 2969, 2913, 1617, 1525, 1339, 1281, 1102, 1019, 921, 879, 751  $\text{cm}^{-1}$ ;

**Optical Rotation:**  $[\alpha]_{\text{D}} = -44.8$  ( $c = 0.5$ ,  $\text{CHCl}_3$ );

**$^1\text{H}$  NMR** (500 MHz,  $\text{CDCl}_3$ )  $\delta$  8.20 (d,  $J = 8.2$  Hz, 2H), 7.47 (d,  $J = 8.7$  Hz, 2H), 6.01 (ddd,  $J = 16.4, 10.7, 5.4$  Hz, 1H), 5.72 (ddd,  $J = 15.9, 10.6, 5.3$  Hz, 1H), 5.61 (ddd,  $J = 17.8, 9.0, 5.5$  Hz, 1H), 5.43–5.31 (m, 3H), 5.18 (ddd,  $J = 6.0, 2.7, 0.9$  Hz, 2H), 5.14–5.06 (m, 1H), 5.02 (d,  $J = 10.3$  Hz, 1H), 4.97 (dd,  $J = 17.2, 1.0$  Hz, 1H), 4.69–4.62 (m, 1H), 2.81–2.73 (m, 1H), 2.17–2.10 (m, 1H), 2.01 (dddd,  $J = 14.8, 5.3, 3.6, 1.8$  Hz, 1H), 1.14 (d,  $J = 6.8$  Hz, 3H);

**$^{13}\text{C}$  NMR** (126 MHz,  $\text{CDCl}_3$ )  $\delta$  147.6, 145.9 (d,  $J_{\text{CP}} = 2.3$  Hz), 137.3, 134.9 (d,  $J_{\text{CP}} = 3.2$  Hz), 134.4 (d,  $J_{\text{CP}} = 7.3$  Hz), 127.9, 123.3 (d,  $J_{\text{CP}} = 5.1$  Hz), 118.0 (d,  $J_{\text{CP}} = 14.5$  Hz), 117.6, 117.2, 82.8 (d,  $J_{\text{CP}} = 6.0$  Hz), 77.9 (d,  $J_{\text{CP}} = 6.8$  Hz), 75.9 (d,  $J = 6.1$  Hz), 44.2 (d,  $J_{\text{CP}} = 6.7$  Hz), 34.9 (d,  $J_{\text{CP}} = 7.7$  Hz), 15.6;

**$^{31}\text{P}$  NMR** (162 MHz,  $\text{CDCl}_3$ )  $\delta$  -7.54;

**HRMS:** cald. for  $\text{C}_{18}\text{H}_{22}\text{NO}_6\text{PNa}$  ( $\text{M}+\text{Na}$ ) $^+$  402.1082; found 402.1069 (TOF MS ES+).

**(4*R*,6*R*)-2-(((1*R*,2*R*)-2-methyl-1-(4-nitrophenyl)but-3-en-1-yl)oxy)-4,6-divinyl-1,3,2-dioxaphosphinane 2-oxide (37):**

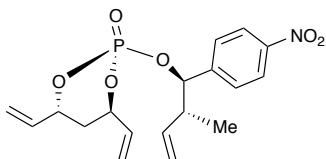

**FTIR** (neat): 2972, 2933, 1610, 1521, 1348, 1282, 1112, 1004, 927, 885, 750  $\text{cm}^{-1}$ ;

**Optical Rotation:**  $[\alpha]_{\text{D}} = -32.8$  ( $c = 0.6$ ,  $\text{CHCl}_3$ );

**$^1\text{H}$  NMR** (500 MHz,  $\text{CDCl}_3$ )  $\delta$  8.21 (d,  $J = 8.7$  Hz, 2H), 7.47 (d,  $J = 8.7$  Hz, 2H), 6.01 (dddd,  $J = 17.0, 10.7, 5.3, 0.7$  Hz, 1H), 5.81–5.70 (m, 2H), 5.43–5.38 (m, 2H), 5.36 (d,  $J = 10.9$  Hz, 1H), 5.21 (d,  $J = 17.0$  Hz, 1H), 5.19 (d,  $J = 10.9$  Hz, 1H), 5.11 (d,  $J = 10.3$  Hz, 1H), 5.13–5.06 (m, 1H), 5.02 (d,  $J = 17.1$  Hz, 1H), 4.76–4.69 (m, 1H), 2.77–2.68 (m, 1H), 2.15 (dddd,  $J = 9.5, 8.0, 4.5, 2.1$  Hz, 1H), 2.03 (dddd,  $J = 14.8, 5.4, 3.6, 1.8$  Hz, 1H), 1.01 (d,  $J = 6.9$  Hz, 3H);

**$^{13}\text{C}$  NMR** (126 MHz,  $\text{CDCl}_3$ )  $\delta$  147.6, 146.1 (d,  $J_{\text{CP}} = 2.5$  Hz), 137.7, 135.0 (d,  $J_{\text{CP}} = 3.2$  Hz), 134.5 (d,  $J_{\text{CP}} = 7.2$  Hz), 127.7, 123.5, 117.9, 117.7, 117.1, 82.8 (d,  $J_{\text{CP}} = 6.0$  Hz), 77.9 (d,  $J_{\text{CP}} = 6.8$  Hz), 76.1 (d,  $J_{\text{CP}} = 6.1$  Hz), 44.4 (d,  $J_{\text{CP}} = 6.5$  Hz), 34.9 (d,  $J_{\text{CP}} = 7.7$  Hz), 15.8;

**$^{31}\text{P}$  NMR** (162 MHz,  $\text{CDCl}_3$ )  $\delta$  -7.61;

**HRMS:** cald. for  $\text{C}_{18}\text{H}_{22}\text{NO}_6\text{PNa}$  ( $\text{M}+\text{Na}$ ) $^+$  402.1082; found 402.1074 (TOF MS ES+).

**(1*R*,3*R*,4*S*,7*R*,9*R*,*Z*)-4-methyl-3-(4-nitrophenyl)-9-vinyl-2,10,11-trioxa-1 phosphabicyclo[5.3.1]undec-5-ene 1-oxide (*cis,syn*-38):**

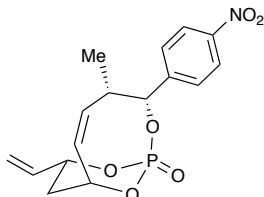

**FTIR** (neat): 2982, 2923, 1613, 1545, 1324, 1295, 1012, 975, 814, 759  $\text{cm}^{-1}$ ;

**Optical Rotation:**  $[\alpha]_{\text{D}} = +70.4$  ( $c = 1.05$ ,  $\text{CHCl}_3$ );

**$^1\text{H}$  NMR** (500 MHz,  $\text{CDCl}_3$ )  $\delta$  8.21 (d,  $J = 8.8$  Hz, 2H), 7.43 (d,  $J = 8.7$  Hz, 2H), 5.91 (dddd,  $J = 17.2, 10.7, 5.1, 2.3$  Hz, 1H), 5.67 (d,  $J = 11.7$  Hz, 1H), 5.51–5.44 (m, 2H), 5.38 (dd,  $J = 25.2, 4.8$  Hz, 1H), 5.32 (ddd,  $J = 10.7, 1.1, 1.0$  Hz, 1H), 5.30–5.21 (m, 2H), 4.09–4.01 (m, 1H), 2.31 (ddd,  $J = 14.7, 12.0, 6.1$  Hz, 1H), 1.99 (ddd,  $J = 14.7, 3.7, 2.1$  Hz, 1H), 0.80 (d,  $J = 6.9$  Hz, 3H);

**$^{13}\text{C}$  NMR** (126 MHz,  $\text{CDCl}_3$ )  $\delta$  147.9, 143.4 (d,  $J_{\text{CP}} = 13.6$  Hz), 134.7 (d,  $J_{\text{CP}} = 10.0$  Hz), 131.6, 130.7, 128.2, 123.2, 117.5 (d,  $J_{\text{CP}} = 1.0$  Hz), 78.4 (d,  $J_{\text{CP}} = 3.7$  Hz), 78.3 (d,  $J_{\text{CP}} = 7.3$  Hz), 77.7 (d,  $J_{\text{CP}} = 6.3$  Hz), 36.2 (d,  $J_{\text{CP}} = 6.6$  Hz), 34.2, 16.8;

**$^{31}\text{P}$  NMR** (162 MHz,  $\text{CDCl}_3$ )  $\delta$  -9.46;

**HRMS:** cald. for  $2(\text{C}_{16}\text{H}_{18}\text{NO}_6\text{P})\text{Na}$  ( $2\text{M}+\text{Na}$ ) $^+$  725.1641; found 725.1623 (TOF MS ES+).

**(4*S*,6*S*)-2-(((1*R*,2*S*)-2-methyl-1-(4-nitrophenyl)but-3-en-1-yl)oxy)-4,6-divinyl-1,3,2-dioxaphosphinane 2-oxide**  
**(40):**

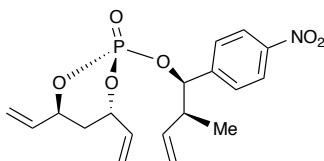

**FTIR** (neat): 3059, 2952, 2931, 1617, 1501, 1331, 1269, 1139, 1024, 927, 739  $\text{cm}^{-1}$ ;

**Optical Rotation:**  $[\alpha]_{\text{D}} = +32.9$  ( $c = 0.93$ ,  $\text{CHCl}_3$ );

**$^1\text{H NMR}$**  (500 MHz,  $\text{CDCl}_3$ )  $\delta$  8.21 (d,  $J = 8.7$  Hz, 2H), 7.48 (d,  $J = 8.7$  Hz, 2H), 5.96–5.85 (m, 2H), 5.66 (ddd,  $J = 17.5, 8.8, 5.6$  Hz, 1H), 5.48 (d,  $J = 17.1$  Hz, 1H), 5.42 (dd,  $J = 8.5, 6.0$  Hz, 1H), 5.33 (d,  $J = 10.7$  Hz, 1H), 5.29 (d,  $J = 17.2$  Hz, 1H), 5.25 (d,  $J = 10.6$  Hz, 1H), 5.07–4.98 (m, 4H), 2.79–2.71 (m, 1H), 2.18 (dddd,  $J = 14.1, 7.6, 4.7, 1.6$  Hz, 1H), 2.08 (dddd,  $J = 14.8, 5.6, 3.8, 1.8$  Hz, 1H), 1.07 (d,  $J = 6.8$  Hz, 3H);

**$^{13}\text{C NMR}$**  (126 MHz,  $\text{CDCl}_3$ )  $\delta$  147.5, 145.9 (d,  $J_{\text{CP}} = 3.1$  Hz), 137.7, 134.8 (d,  $J_{\text{CP}} = 3.6$  Hz), 134.7 (d,  $J_{\text{CP}} = 7.1$  Hz), 127.8, 123.3, 118.0, 117.7, 116.9, 82.8 (d,  $J_{\text{CP}} = 6.0$  Hz), 77.6 (d,  $J_{\text{CP}} = 6.8$  Hz), 76.4 (d,  $J_{\text{CP}} = 6.3$  Hz), 44.0 (d,  $J_{\text{CP}} = 6.1$  Hz), 35.0 (d,  $J_{\text{CP}} = 7.9$  Hz), 14.8;

**$^{31}\text{P NMR}$**  (162 MHz,  $\text{CDCl}_3$ )  $\delta$  -7.82;

**HRMS:** cald. for  $\text{C}_{18}\text{H}_{22}\text{NO}_6\text{PNa}$  ( $\text{M}+\text{Na}$ ) $^+$  402.1082; found 402.1072 (TOF MS ES+).

**(4*S*,6*S*)-2-(((1*R*,2*R*)-2-methyl-1-(4-nitrophenyl)but-3-en-1-yl)oxy)-4,6-divinyl-1,3,2-dioxaphosphinane 2-oxide**  
**(41):**

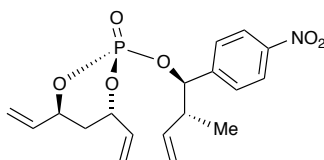

**FTIR** (neat): 2954, 2931, 1608, 1529, 1319, 1289, 1136, 1015, 920, 875, 751  $\text{cm}^{-1}$ ;

**Optical Rotation:**  $[\alpha]_{\text{D}} = +41.1$  ( $c = 1.24$ ,  $\text{CHCl}_3$ );

**$^1\text{H NMR}$**  (500 MHz,  $\text{CDCl}_3$ )  $\delta$  8.21 (d,  $J = 8.7$  Hz, 2H), 7.48 (d,  $J = 8.7$  Hz, 2H), 5.96–5.88 (m, 2H), 5.73 (ddd,  $J = 17.9, 10.3, 7.8$  Hz, 1H), 5.48 (d,  $J = 17.0$  Hz, 1H), 5.39 (dd,  $J = 8.6, 6.2$  Hz, 1H), 5.33 (d,  $J = 4.2$  Hz, 1H), 5.30 (d,  $J = 11.1$  Hz, 1H), 5.27 (d,  $J = 10.6$  Hz, 1H), 5.09 (d,  $J = 10.3$  Hz, 1H), 5.07–4.99 (m, 3H), 2.75–2.67 (m, 1H), 2.18 (dddd,  $J = 14.1, 7.6, 4.7, 1.5$  Hz, 1H), 2.08 (dddd,  $J = 14.8, 5.6, 3.8, 1.8$  Hz, 1H), 0.99 (d,  $J = 6.9$  Hz, 3H);

**$^{13}\text{C NMR}$**  (126 MHz,  $\text{CDCl}_3$ )  $\delta$  147.5, 146.1 (d,  $J_{\text{CP}} = 2.9$  Hz), 137.9, 134.7 (d,  $J_{\text{CP}} = 3.4$  Hz), 134.7 (d,  $J_{\text{CP}} = 7.2$  Hz), 127.6, 123.3, 118.0, 117.7, 117.0, 82.9 (d,  $J_{\text{CP}} = 5.9$  Hz), 77.7 (d,  $J_{\text{CP}} = 6.8$  Hz), 76.3 (d,  $J_{\text{CP}} = 6.3$  Hz), 44.4 (d,  $J_{\text{CP}} = 6.2$  Hz), 35.0 (d,  $J_{\text{CP}} = 7.8$  Hz), 15.8;

**$^{31}\text{P NMR}$**  (162 MHz,  $\text{CDCl}_3$ )  $\delta$  -7.82;

**HRMS:** cald. for  $\text{C}_{18}\text{H}_{22}\text{NO}_6\text{PNa}$  ( $\text{M}+\text{Na}$ ) $^+$  402.1082; found 402.1064 (TOF MS ES+).



**(1*S*,3*R*,4*R*,7*S*,9*S*,*Z*)-4-methyl-3-(4-nitrophenyl)-9-vinyl-2,10,11-trioxa-1-phosphabicyclo[5.3.1]undec-5-ene 1-oxide (*trans,anti*-43):**

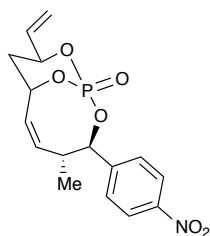

**FTIR** (neat): 2984, 2914, 1623, 1523, 1349, 1290, 1004, 970, 852, 750  $\text{cm}^{-1}$ ;

**Optical Rotation:**  $[\alpha]_{\text{D}} = +151.2$  ( $c = 0.4$ ,  $\text{CHCl}_3$ );

**$^1\text{H}$  NMR** (500 MHz,  $\text{CDCl}_3$ )  $\delta$  8.27 (d,  $J = 8.8$  Hz, 2H), 7.74 (d,  $J = 8.8$  Hz, 2H), 5.86 (dddd,  $J = 17.1, 10.6, 5.5, 2.0$  Hz, 1H), 5.66–5.58 (m, 2H), 5.40 (d,  $J = 17.2$  Hz, 1H), 5.38 (dd,  $J = 24.8, 5.6$  Hz, 1H), 5.27 (d,  $J = 10.6$  Hz, 1H), 5.04 (dd,  $J = 11.8, 5.5$  Hz, 1H), 4.59 (dd,  $J = 29.6, 11.7$  Hz, 1H), 4.04–3.90 (m, 1H), 2.26 (ddd,  $J = 14.6, 12.0, 5.8$  Hz, 1H), 1.87 (ddd,  $J = 14.6, 3.8, 1.8$  Hz, 1H), 0.85 (d,  $J = 6.6$  Hz, 3H);

**$^{13}\text{C}$  NMR** (126 MHz,  $\text{CDCl}_3$ )  $\delta$  148.3, 142.9, 134.9 (d,  $J_{\text{CP}} = 10.3$  Hz), 134.6, 130.1, 130.0, 123.8, 117.5 (d,  $J_{\text{CP}} = 1.3$  Hz), 83.2 (d,  $J_{\text{CP}} = 6.6$  Hz), 78.2 (d,  $J_{\text{CP}} = 7.3$  Hz), 77.1 (d,  $J_{\text{CP}} = 6.5$  Hz), 36.2 (d,  $J_{\text{CP}} = 6.4$  Hz), 34.5, 18.3;

**$^{31}\text{P}$  NMR** (162 MHz,  $\text{CDCl}_3$ )  $\delta$  -11.71;

**HRMS:** calcd. for  $2(\text{C}_{16}\text{H}_{18}\text{NO}_6\text{P})\text{Na}$  ( $2\text{M}+\text{Na}$ ) $^+$  725.1641; found 725.1647 (TOF MS ES+).

**(4*S*,6*S*)-2-((2-methylbut-3-en-1-yl)oxy)-4,6-divinyl-1,3,2-dioxaphosphinane 2-oxide (45a):** (*pair of diastereomers detected by  $^{13}\text{C}$  NMR*)

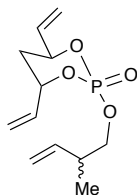

**FTIR** (thin film): 2964, 2926, 1647, 1458, 1283, 1140, 1119, 1013, 926  $\text{cm}^{-1}$ ;

**Optical Rotation:**  $[\alpha]_{\text{D}} = +62.02$  ( $c = 1.24$ ,  $\text{CHCl}_3$ );

**$^1\text{H}$  NMR** (400 MHz,  $\text{CDCl}_3$ )  $\delta$  6.03 (ddd,  $J = 16.6, 10.6, 6.2$  Hz, 1H), 5.90 (dddd,  $J = 17.7, 10.6, 5.2, 1.7, 0.7$  Hz, 1H), 5.75 (dddd,  $J = 17.4, 10.2, 7.0, 2.7$  Hz, 1H), 5.46 (ddd,  $J = 17.2, 1.1, 1.1$  Hz, 1H), 5.37 (ddd,  $J = 17.2, 1.2, 0.9$  Hz, 1H), 5.33 – 5.27 (m, 2H), 5.14–5.01 (m, 3H), 5.00–4.93 (m, 1H), 4.03–3.97 (m, 1H), 3.95 (ddd,  $J = 13.3, 6.4, 3.9$  Hz, 1H), 2.70–2.47 (m, 1H), 2.17 (dddd,  $J = 14.6, 8.3, 4.9, 1.5$  Hz, 1H), 2.10–1.98 (m, 1H), 1.06 (d,  $J = 6.8$  Hz, 3H);

**$^{13}\text{C}$  NMR** (126 MHz,  $\text{CDCl}_3$ )  $\delta$  139.4 (d,  $J_{\text{CP}} = 5.7$  Hz), 135.0 (d,  $J_{\text{CP}} = 3.0$  Hz), 135.0, 118.1 (d,  $J_{\text{CP}} = 1.6$  Hz), 117.4, 115.4 (d,  $J_{\text{CP}} = 7.1$  Hz), 77.8 (d,  $J_{\text{CP}} = 6.8$  Hz), 76.0 (d,  $J_{\text{CP}} = 1.1$  Hz), 75.9 (d,  $J_{\text{CP}} = 1.0$  Hz), 71.6 (d,  $J_{\text{CP}} = 6.2$  Hz), 38.2 (d,  $J_{\text{CP}} = 7.3$  Hz), 38.1 (d,  $J_{\text{CP}} = 7.1$  Hz), 35.2 (d,  $J_{\text{CP}} = 1.1$  Hz), 35.1 (d,  $J_{\text{CP}} = 1.1$  Hz), 16.0 (d,  $J_{\text{CP}} = 6.0$  Hz);

<sup>31</sup>P NMR (162 MHz, CDCl<sub>3</sub>) δ -7.61;

HRMS calcd for C<sub>12</sub>H<sub>19</sub>O<sub>4</sub>PNa (M+Na)<sup>+</sup> 281.0919; found 281.0913 (TOF MS ES+).

(4*S*,6*S*)-2-(((*S*)-2-methylbut-3-en-1-yl)oxy)-4,6-divinyl-1,3,2-dioxaphosphinane 2-oxide (45b):

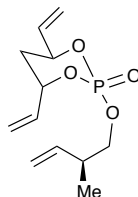

FTIR (thin film): 2968, 2920, 1625, 1456, 1280, 1145, 1016, 925 cm<sup>-1</sup>;

Optical Rotation: [α]<sub>D</sub> = +83.91(c = 0.44, CHCl<sub>3</sub>);

<sup>1</sup>H NMR (400 MHz, CDCl<sub>3</sub>) δ 6.04 (ddd, *J* = 17.0, 10.6, 6.0 Hz, 1H), 5.91 (dddd, *J* = 17.3, 10.5, 5.1, 1.2 Hz, 1H), 5.76 (ddd, *J* = 14.1, 10.4, 7.0 Hz, 1H), 5.46 (d, *J* = 17.1 Hz, 1H), 5.38 (d, *J* = 17.2 Hz, 1H), 5.31 (ddd, *J* = 10.6, 1.9, 1.0 Hz, 2H), 5.16–5.06 (m, 2H), 5.06–5.01 (m, 1H), 5.01–4.95 (m, 1H), 4.03–3.95 (m, 2H), 2.57 (dt, *J* = 13.4, 6.7 Hz, 1H), 2.17 (dddd, *J* = 14.7, 8.1, 4.7, 1.3 Hz, 1H), 2.08–2.01 (m, 1H), 1.07 (d, *J* = 6.8 Hz, 3H);

<sup>13</sup>C NMR (126 MHz, CDCl<sub>3</sub>) δ 139.5, 135.1 (d, *J*<sub>CP</sub> = 2.9 Hz), 135.0, 118.1, 117.4, 115.4, 77.8 (d, *J*<sub>CP</sub> = 6.8 Hz), 76.0 (d, *J*<sub>CP</sub> = 6.1 Hz), 71.6 (d, *J*<sub>CP</sub> = 6.1 Hz), 38.2 (d, *J*<sub>CP</sub> = 7.0 Hz), 35.2 (d, *J*<sub>CP</sub> = 7.7 Hz), 16.0;

<sup>31</sup>P NMR (162 MHz, CDCl<sub>3</sub>) δ -7.61;

HRMS calcd for C<sub>12</sub>H<sub>19</sub>O<sub>4</sub>PNa (M+Na)<sup>+</sup> 281.0919; found 281.0914 (TOF MS ES+).

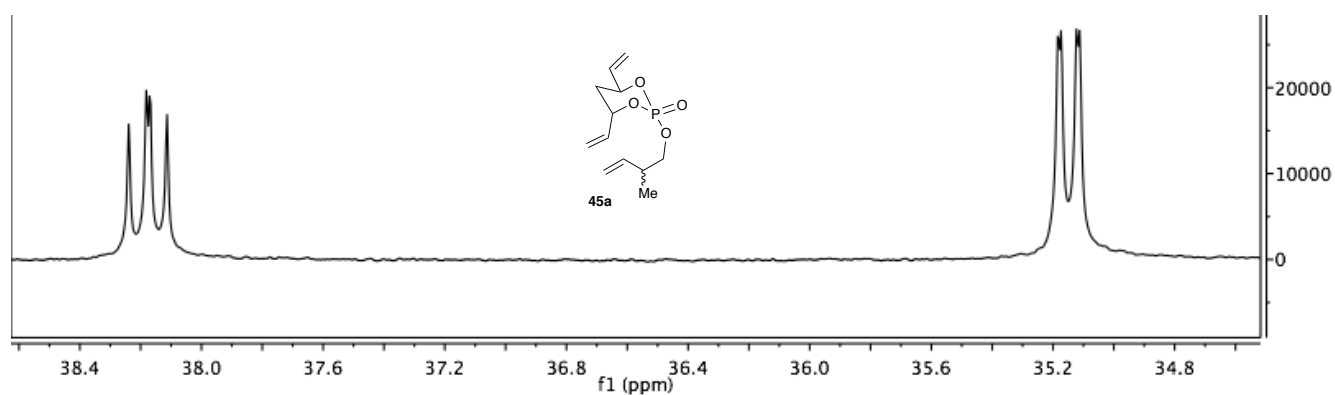

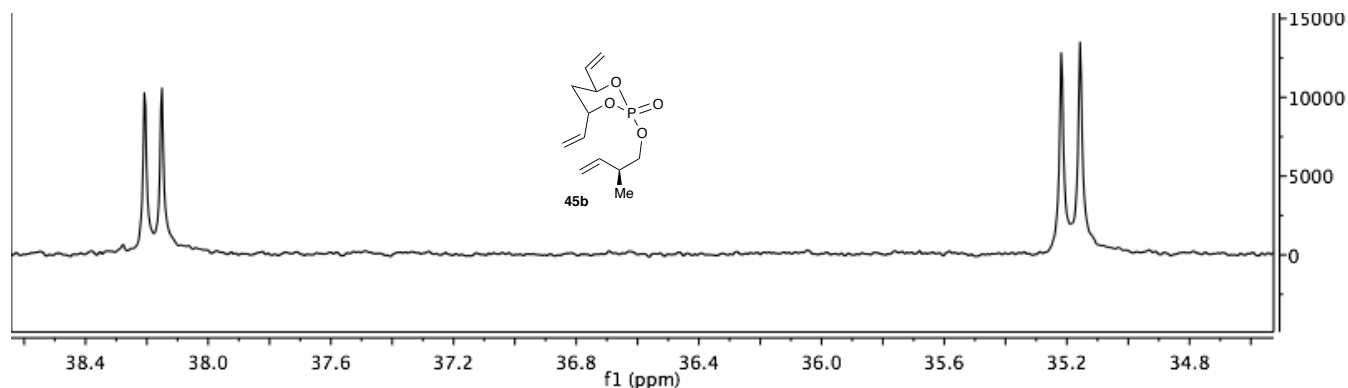

**(1*S*,4*R*,7*S*,9*S*,*Z*)-4-methyl-9-vinyl-2,10,11-trioxa-1-phospha-bicyclo[5.3.1]undec-5-ene 1-oxide (46):**

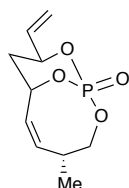

**FTIR** (thin film): 2922, 1827, 1649, 1448, 1375, 1281, 1140, 1119, 1003, 928  $\text{cm}^{-1}$ ;

**Optical Rotation:**  $[\alpha]_{\text{D}} = +122.98$  ( $c = 0.57$ ,  $\text{CHCl}_3$ );

**$^1\text{H}$  NMR** (400 MHz,  $\text{CDCl}_3$ )  $\delta$  5.85 (dddd,  $J = 18.0, 10.6, 5.4, 2.1$  Hz, 1H), 5.48–5.45 (m, 2H), 5.45–5.39 (m, 1H), 5.33–5.22 (m, 2H), 5.07 (dd,  $J = 11.7, 5.3$  Hz, 1H), 4.33 (ddd,  $J = 10.8, 6.2, 2.1$  Hz, 1H), 3.64–3.52 (m, 1H), 3.34 (ddd,  $J = 30.9, 12.5, 10.8$  Hz, 1H), 2.26–2.15 (m, 1H), 1.82 (ddd,  $J = 14.5, 3.7, 2.0$  Hz, 1H), 1.01 (d,  $J = 6.6$  Hz, 3H);

**$^{13}\text{C}$  NMR** (126 MHz,  $\text{CDCl}_3$ )  $\delta$  135.0 (d,  $J_{\text{CP}} = 10.1$  Hz), 134.1, 129.3, 117.3 (d,  $J_{\text{CP}} = 1.1$  Hz), 77.9 (d,  $J_{\text{CP}} = 7.1$  Hz), 77.1 (d,  $J_{\text{CP}} = 6.2$  Hz), 68.2 (d,  $J_{\text{CP}} = 5.0$  Hz), 36.2 (d,  $J_{\text{CP}} = 6.5$  Hz), 31.2, 16.6;

**$^{31}\text{P}$  NMR** (162 MHz,  $\text{CDCl}_3$ )  $\delta$  -8.05;

**HRMS** calcd for  $\text{C}_{10}\text{H}_{15}\text{O}_4\text{PNa}$  ( $\text{M}+\text{Na}$ ) $^+$  253.0606; found 253.0617 (TOF MS ES+).

**(4*R*,6*R*)-4,6-diallyl-2-(((*R*)-1-(benzyloxy)but-3-en-2-yl)oxy)-1,3,2-dioxaphosphinane 2-oxide (50):**

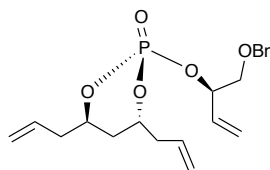

**FTIR** (thin film): 2924, 1643, 1431, 1366, 1286, 1095, 1011, 976, 922  $\text{cm}^{-1}$ ;

**Optical Rotation:**  $[\alpha]_{\text{D}} = +41.66$  ( $c = 0.71$ ,  $\text{CHCl}_3$ );

**$^1\text{H}$  NMR** (400 MHz,  $\text{CDCl}_3$ )  $\delta$  7.37–7.28 (m, 5H), 5.94 (ddd,  $J = 17.2, 10.5, 6.7$  Hz, 1H), 5.84 – 5.77 (m, 1H), 5.77–5.70 (m, 1H), 5.44 (ddd,  $J = 17.2, 1.1, 1.1$  Hz, 1H), 5.31 (ddd,  $J = 10.5, 1.1, 1.1$  Hz, 1H), 5.18–5.12 (m, 3H),

5.12–5.09 (m, 1H), 5.07–5.00 (m, 1H), 4.67–4.55 (m, 3H), 4.55–4.48 (m, 1H), 3.67 (dd,  $J = 10.5, 5.6$  Hz, 1H), 3.63 (ddd,  $J = 10.5, 4.7, 1.1$  Hz, 1H), 2.66 (dt,  $J = 13.2, 6.5$  Hz, 1H), 2.54 (ddd,  $J = 7.6, 6.6, 3.3$  Hz, 1H), 2.44–2.33 (m, 2H), 2.00 (dddd,  $J = 13.5, 8.4, 5.0, 1.2$  Hz, 1H), 1.89 (dddd,  $J = 14.6, 5.4, 3.8, 1.8$  Hz, 1H);

$^{13}\text{C}$  NMR (126 MHz,  $\text{CDCl}_3$ )  $\delta$  137.9, 133.9 (d,  $J_{\text{CP}} = 3.9$  Hz), 132.6 (d,  $J_{\text{CP}} = 5.7$  Hz), 132.3, 128.4 (d,  $J_{\text{CP}} = 9.9$  Hz), 127.8 (d,  $J_{\text{CP}} = 2.7$  Hz), 127.6, 118.7 (d,  $J_{\text{CP}} = 2.6$  Hz), 78.0 (d,  $J_{\text{CP}} = 5.6$  Hz), 77.3, 75.3 (d,  $J_{\text{CP}} = 6.7$  Hz), 73.3 (d,  $J_{\text{CP}} = 6.1$  Hz), 72.2 (d,  $J_{\text{CP}} = 6.0$  Hz), 40.0 (d,  $J_{\text{CP}} = 7.7$  Hz), 40.0 (d,  $J_{\text{CP}} = 3.5$  Hz), 33.0 (d,  $J_{\text{CP}} = 6.8$  Hz), 31.0;

$^{31}\text{P}$  NMR (162 MHz,  $\text{CDCl}_3$ )  $\delta$  -7.34;

HRMS calcd for  $\text{C}_{20}\text{H}_{27}\text{O}_5\text{PNa}$  ( $\text{M}+\text{Na}$ ) $^+$  401.1494; found 401.1493 (TOF MS ES+).

**(4*R*,6*R*)-2-(((*R*)-1-(benzyloxy)but-3-en-2-yl)oxy)-4,6-bis(2-methylallyl)-1,3,2-dioxaphosphinane 2-oxide (51):**

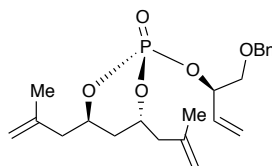

FTIR (thin film): 3076, 2964, 2926, 2359, 1827, 1649, 1454, 1364, 1288, 1099, 1074, 1007, 982, 739  $\text{cm}^{-1}$ ;

Optical Rotation:  $[\alpha]_{\text{D}} = +44.04$  ( $c = 1.3$ ,  $\text{CHCl}_3$ );

$^1\text{H}$  NMR (400 MHz,  $\text{CDCl}_3$ )  $\delta$  7.34 (d,  $J = 4.4$  Hz, 3H), 7.32–7.28 (m, 2H), 5.95 (ddd,  $J = 17.2, 10.5, 6.7$  Hz, 1H), 5.44 (ddd,  $J = 17.2, 1.3, 1.3$  Hz, 1H), 5.31 (ddd,  $J = 10.6, 1.1, 1.2$  Hz, 1H), 5.08–4.99 (m, 1H), 4.85 (ddd,  $J = 7.04, 1.6, 1.6$  Hz, 2H), 4.77 (d,  $J = 9.8$  Hz, 2H), 4.74–4.59 (m, 3H), 4.56 (d,  $J = 12.0$  Hz, 1H), 3.67 (dd,  $J = 10.5, 5.6$  Hz, 1H), 3.63 (ddd,  $J = 10.6, 4.9, 1.0$  Hz, 1H), 2.62 (dd,  $J = 14.2, 6.7$  Hz, 1H), 2.53 (dd,  $J = 14.1, 6.7$  Hz, 1H), 2.37 (dd,  $J = 14.1, 7.8$  Hz, 1H), 2.32 (dd,  $J = 13.6, 6.5$  Hz, 1H), 1.98 (dddd,  $J = 13.0, 8.0, 4.9, 1.2$  Hz, 1H), 1.89 (dddd,  $J = 14.6, 5.4, 3.9, 1.9$  Hz, 1H), 1.75 (s, 3H), 1.73 (s, 3H);

$^{13}\text{C}$  NMR (126 MHz,  $\text{CDCl}_3$ )  $\delta$  140.4, 140.2, 139.8, 137.9, 134.0 (d,  $J_{\text{CP}} = 4.1$  Hz), 128.3, 127.6, 118.7, 114.6 (d,  $J_{\text{CP}} = 3.7$  Hz), 114.2 (d,  $J_{\text{CP}} = 4.8$  Hz), 78.0 (d,  $J_{\text{CP}} = 5.6$  Hz), 76.1 (d,  $J_{\text{CP}} = 6.9$  Hz), 74.4 (d,  $J_{\text{CP}} = 6.6$  Hz), 73.2, 72.2 (d,  $J_{\text{CP}} = 5.8$  Hz), 43.8 (d,  $J_{\text{CP}} = 7.5$  Hz), 42.8 (d,  $J_{\text{CP}} = 3.4$  Hz), 33.2 (d,  $J_{\text{CP}} = 6.8$  Hz), 22.6, 22.3;

$^{31}\text{P}$  NMR (162 MHz,  $\text{CDCl}_3$ )  $\delta$  -7.09;

HRMS calcd for  $\text{C}_{22}\text{H}_{31}\text{O}_5\text{PNa}$  ( $\text{M}+\text{Na}$ ) $^+$  429.1807; found 429.1802 (TOF MS ES+).

**(1*S*,3*R*,7*R*,9*R*,*Z*)-9-allyl-3-((benzyloxy)methyl)-2,10,11-trioxa-1-phosphabicyclo[5.3.1]undec-4-ene 1-oxide (*trans*-52):**

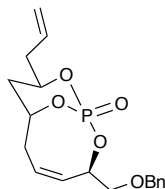

FTIR (thin film): 2920, 1364, 1288, 1113, 1092, 1022, 972, 928  $\text{cm}^{-1}$ ;

Optical Rotation:  $[\alpha]_{\text{D}} = +61.6$  ( $c = 0.38$ ,  $\text{CHCl}_3$ );

<sup>1</sup>H NMR (400 MHz, CDCl<sub>3</sub>) δ 7.40–7.28 (m, 5H), 5.89–5.78 (m, 3H), 5.19 (dd, *J* = 4.2, 2.8 Hz, 1H), 5.15 (s, 1H), 5.03 (ddd, *J* = 28.5, 7.1 Hz, 1H), 4.83–4.73 (m, 1H), 4.68 (d, *J* = 11.8 Hz, 1H), 4.59 (d, *J* = 11.8 Hz, 1H), 4.52–4.37 (m, 1H), 4.03 (dd, *J* = 9.8, 6.9 Hz, 1H), 3.79 (dd, *J* = 9.8, 7.2 Hz, 1H), 3.17 (ddd, *J* = 13.6, 10.4, 6.2 Hz, 1H), 2.59 – 2.50 (m, 1H), 2.41 (dt, *J* = 14.3, 6.7 Hz, 1H), 2.27 (ddd, *J* = 14.6, 11.9, 5.2 Hz, 1H), 2.21–2.13 (m, 1H), 1.69 (dd, *J* = 14.6, 1.1 Hz, 1H);

<sup>13</sup>C NMR (126 MHz, CDCl<sub>3</sub>) δ 137.8, 132.1, 130.1, 128.4 (d, *J*<sub>CP</sub> = 7.3 Hz), 128.0, 127.7 (d, *J*<sub>CP</sub> = 12.6 Hz), 126.4, 119.0, 75.8 (d, *J*<sub>CP</sub> = 7.4 Hz), 73.6, 73.1 (d, *J*<sub>CP</sub> = 6.4 Hz), 71.8 (d, *J*<sub>CP</sub> = 2.1 Hz), 40.6 (d, *J*<sub>CP</sub> = 8.6 Hz), 33.5 (d, *J*<sub>CP</sub> = 6.3 Hz), 31.1 (d, *J*<sub>CP</sub> = 32.0 Hz), 29.7;

<sup>31</sup>P NMR (162 MHz, CDCl<sub>3</sub>) δ -10.75;

HRMS calcd for C<sub>18</sub>H<sub>23</sub>O<sub>5</sub>PNa (M+Na)<sup>+</sup> 373.1181; found 373.1173 (TOF MS ES+).

**(1*S*,3*R*,7*R*,9*R*,*Z*)-3-((benzyloxy)methyl)-5-methyl-9-(2-methylallyl)-2,10,11-trioxa-1-phosphabicyclo[5.3.1]undec-4-ene 1-oxide (*trans*-53):**

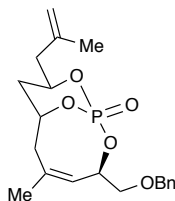

FTIR (thin film): 2924, 2853, 1718, 1649, 1452, 1246, 1175, 1095, 1013, 899, 818, 748 cm<sup>-1</sup>;

Optical Rotation: [ $\alpha$ ]<sub>D</sub> = + 50.10 (*c* = 1.3, CHCl<sub>3</sub>);

<sup>1</sup>H NMR (400 MHz, CDCl<sub>3</sub>) δ 7.39–7.28 (m, 5H), 5.57 (s, 1H), 4.98 (dd, *J* = 25.2, 1.7 Hz, 1H), 4.93–4.84 (m, 2H), 4.82 (s, 1H), 4.67 (d, *J* = 11.9 Hz, 1H), 4.58 (d, *J* = 11.9 Hz, 1H), 4.56–4.45 (m, 1H), 3.94 (dd, *J* = 9.9, 7.0 Hz, 1H), 3.72 (dd, *J* = 9.9, 6.6 Hz, 1H), 3.29 (t, *J* = 12.8 Hz, 1H), 2.57 (dd, *J* = 14.0, 6.6 Hz, 1H), 2.33 (ddd, *J* = 14.0, 6.8, 1.4 Hz, 1H), 2.24 (ddd, *J* = 14.6, 11.7, 5.3 Hz, 1H), 1.97 (dd, *J* = 13.1, 5.2 Hz, 1H), 1.86 (t, *J* = 1.6 Hz, 3H), 1.78 (s, 3H), 1.73 (d, *J* = 14.6 Hz, 1H);

<sup>13</sup>C NMR (126 MHz, CDCl<sub>3</sub>) δ 140.1, 137.8, 137.1, 128.4, 127.8 (d, *J*<sub>CP</sub> = 26.9 Hz), 123.6, 114.4, 76.1 (d, *J*<sub>CP</sub> = 7.7 Hz), 75.2 (d, *J*<sub>CP</sub> = 7.4 Hz), 73.6, 72.3 (d, *J*<sub>CP</sub> = 6.4 Hz), 72.1 (d, *J*<sub>CP</sub> = 3.7 Hz), 44.7 (d, *J*<sub>CP</sub> = 7.7 Hz), 36.5, 33.7 (d, *J*<sub>CP</sub> = 6.6 Hz), 29.7, 24.3, 22.8;

<sup>31</sup>P NMR (162 MHz, CDCl<sub>3</sub>) δ -4.06;

HRMS calcd for C<sub>20</sub>H<sub>27</sub>O<sub>5</sub>PNa (M+Na)<sup>+</sup> 401.1494; found 401.1495 (TOF MS ES+).

**(4*S*,6*S*)-4,6-diallyl-2-(((*R*)-1-(benzyloxy)but-3-en-2-yl)oxy)-1,3,2-dioxaphosphinane 2-oxide (56):**

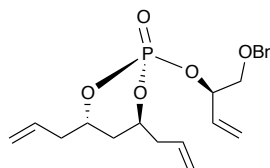

**FTIR** (thin film): 2922, 1641, 1364, 1286, 1095, 1119, 1007, 920  $\text{cm}^{-1}$ ;

**Optical Rotation:**  $[\alpha]_{\text{D}} = -44.31$  ( $c = 0.24$ ,  $\text{CHCl}_3$ );

**$^1\text{H}$  NMR** (400 MHz,  $\text{CDCl}_3$ )  $\delta$  7.36–7.28 (m, 5H), 5.90 (ddd,  $J = 16.9, 10.6, 6.0$  Hz, 1H), 5.81–5.72 (m, 1H), 5.72–5.62 (m, 1H), 5.45 (ddd,  $J = 17.2, 1.2$  Hz, 1H), 5.31 (ddd,  $J = 10.6, 1.2$  Hz, 1H), 5.15–5.10 (m, 3H), 5.10–5.07 (m, 1H), 5.02 (td,  $J = 11.6, 5.5$  Hz, 1H), 4.63–4.54 (m, 4H), 3.62 (dd,  $J = 5.5, 0.8$  Hz, 2H), 2.70 (dt,  $J = 13.3, 6.7$  Hz, 1H), 2.49–2.43 (m, 1H), 2.39 (dd,  $J = 14.5, 7.3$  Hz, 1H), 2.34–2.26 (m, 1H), 2.02–1.93 (m, 1H), 1.87–1.79 (m, 1H);

**$^{13}\text{C}$  NMR** (126 MHz,  $\text{CDCl}_3$ )  $\delta$  137.7, 133.4 (d,  $J_{\text{CP}} = 3.8$  Hz), 132.8, 132.3, 128.4, 127.7 (d,  $J_{\text{CP}} = 7.8$  Hz), 118.7 (d,  $J_{\text{CP}} = 8.5$  Hz), 118.5, 77.7 (d,  $J_{\text{CP}} = 7.1$  Hz), 77.6 (d,  $J_{\text{CP}} = 5.5$  Hz), 75.0 (d,  $J_{\text{CP}} = 6.6$  Hz), 73.2, 72.4 (d,  $J_{\text{CP}} = 6.0$  Hz), 40.0 (d,  $J_{\text{CP}} = 8.0$  Hz), 38.8 (d,  $J_{\text{CP}} = 2.8$  Hz), 32.9 (d,  $J_{\text{CP}} = 6.9$  Hz), 30.9;

**$^{31}\text{P}$  NMR** (162 MHz,  $\text{CDCl}_3$ )  $\delta$  -7.59;

**HRMS** calcd for  $\text{C}_{20}\text{H}_{27}\text{O}_5\text{PNa}$  ( $\text{M}+\text{Na}$ ) $^+$  401.1494; found 401.1491 (TOF MS ES+).

**(4*S*,6*S*)-2-(((*R*)-1-(benzyloxy)but-3-en-2-yl)oxy)-4,6-bis(2-methylallyl)-1,3,2-dioxaphosphinane 2-oxide (57):**

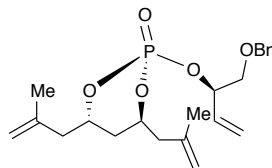

**FTIR** (thin film): 2918, 1827, 1649, 1448, 1290, 1092, 1074, 1007, 976  $\text{cm}^{-1}$ ;

**Optical Rotation:**  $[\alpha]_{\text{D}} = -40.69$  ( $c = 1.4$ ,  $\text{CHCl}_3$ );

**$^1\text{H}$  NMR** (400 MHz,  $\text{CDCl}_3$ )  $\delta$  7.38–7.28 (m, 5H), 5.90 (ddd,  $J = 16.9, 10.6, 6.1$  Hz, 1H), 5.44 (d,  $J = 17.2$  Hz, 1H), 5.30 (d,  $J = 10.6$  Hz, 1H), 5.01 (dq,  $J = 12.4, 6.1$  Hz, 1H), 4.85 (ddd,  $J = 10.6, 1.4, 1.4$  Hz, 2H), 4.79–4.68 (m, 4H), 4.61 (d,  $J = 12.1$  Hz, 1H), 4.57 (d,  $J = 12.0$  Hz, 1H), 3.66–3.57 (m, 2H), 2.65 (dd,  $J = 14.1, 6.9$  Hz, 1H), 2.49 (dd,  $J = 14.1, 6.4$  Hz, 1H), 2.39 (dd,  $J = 14.2, 7.7$  Hz, 1H), 2.29 (dd,  $J = 14.1, 7.3$  Hz, 1H), 1.97 (dddd,  $J = 14.7, 8.2, 5.1, 1.3$  Hz, 1H), 1.87 (dddd,  $J = 14.6, 5.3, 3.7, 1.9$  Hz, 1H), 1.74 (s, 3H), 1.69 (s, 3H);

**$^{13}\text{C}$  NMR** (126 MHz,  $\text{CDCl}_3$ )  $\delta$  140.5, 140.3, 137.7, 133.5 (d,  $J_{\text{CP}} = 3.8$  Hz), 128.4 (d,  $J_{\text{CP}} = 2.7$  Hz), 128.4, 127.8 (d,  $J_{\text{CP}} = 5.0$  Hz), 127.7 (d,  $J_{\text{CP}} = 9.0$  Hz), 118.5, 114.1 (d,  $J_{\text{CP}} = 2.9$  Hz), 77.7 (d,  $J_{\text{CP}} = 5.5$  Hz), 76.3 (d,  $J_{\text{CP}} = 7.0$  Hz), 74.3 (d,  $J_{\text{CP}} = 6.7$  Hz), 73.2, 72.3 (d,  $J_{\text{CP}} = 6.1$  Hz), 43.8 (d,  $J_{\text{CP}} = 7.7$  Hz), 42.7 (d,  $J_{\text{CP}} = 3.0$  Hz), 33.1 (d,  $J_{\text{CP}} = 7.1$  Hz), 22.6, 22.3;

**$^{31}\text{P}$  NMR** (162 MHz,  $\text{CDCl}_3$ )  $\delta$  -7.58;

**HRMS** calcd for  $\text{C}_{22}\text{H}_{31}\text{O}_5\text{PNa}$  ( $\text{M}+\text{Na}$ ) $^+$  429.1807; found 429.1794 (TOF MS ES+).

**(1*R*,3*R*,7*S*,9*S*,*Z*)-9-allyl-3-((benzyloxy)methyl)-2,10,11-trioxa-1-phosphabicyclo[5.3.1]undec-4-ene 1-oxide**  
**(*cis*-58):**

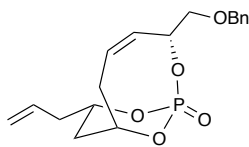

**FTIR** (thin film): 2924, 2363, 1641, 1497, 1452, 1364, 1292, 1103, 978, 928  $\text{cm}^{-1}$ ;

**Optical Rotation:**  $[\alpha]_{\text{D}} = +43.30$  ( $c = 1.03$ ,  $\text{CHCl}_3$ );

**$^1\text{H}$  NMR** (400 MHz,  $\text{CDCl}_3$ )  $\delta$  7.39–7.27 (m, 5H), 5.89–5.81 (m, 1H), 5.81–5.74 (m, 1H), 5.68 (dd,  $J = 11.9, 3.0$  Hz, 1H), 5.25–5.17 (m, 2H), 5.16 (d,  $J = 1.1$  Hz, 1H), 4.79 (dddd,  $J = 12.5, 6.2, 6.2, 2.7$  Hz, 1H), 4.63 (d,  $J = 12.3$  Hz, 1H), 4.59 (d,  $J = 12.2$  Hz, 1H), 4.56–4.41 (m, 1H), 3.70–3.61 (m, 2H), 3.31 (td,  $J = 13.1, 8.4$  Hz, 1H), 2.53 (ddd,  $J = 12.9, 7.1, 1.3$  Hz, 1H), 2.47 – 2.36 (m, 1H), 2.24 (ddd,  $J = 14.6, 12.2, 5.2$  Hz, 1H), 2.07 (ddd,  $J = 13.7, 8.4, 5.3$  Hz, 1H), 1.65 (d,  $J = 14.7$  Hz, 1H);

**$^{13}\text{C}$  NMR** (126 MHz,  $\text{CDCl}_3$ )  $\delta$  137.8, 132.0, 130.3, 128.3, 127.6 (d,  $J_{\text{CP}} = 15.2$  Hz), 126.2, 124.2, 119.0, 77.2 (d,  $J_{\text{CP}} = 5.5$  Hz), 76.0 (d,  $J_{\text{CP}} = 7.3$  Hz), 74.3 (d,  $J_{\text{CP}} = 6.4$  Hz), 73.1, 71.4 (d,  $J_{\text{CP}} = 12.0$  Hz), 40.4 (d,  $J_{\text{CP}} = 9.2$  Hz), 33.8 (d,  $J_{\text{CP}} = 6.3$  Hz), 30.2 (d,  $J_{\text{CP}} = 10.3$  Hz);

**$^{31}\text{P}$  NMR** (162 MHz,  $\text{CDCl}_3$ )  $\delta$  -7.60;

**HRMS** calcd for  $\text{C}_{18}\text{H}_{23}\text{O}_5\text{PNa}$  ( $\text{M}+\text{Na}$ ) $^+$  373.1181; found 373.1174 (TOF MS ES+).

**(4*S*,6*S*)-2-(((2*S*,3*S*,4*S*)-1-((4-methoxybenzyl)oxy)-2,4-dimethylhex-5-en-3-yl)oxy)-4,6-divinyl-1,3,2-dioxaphosphinane 2-oxide (9):**

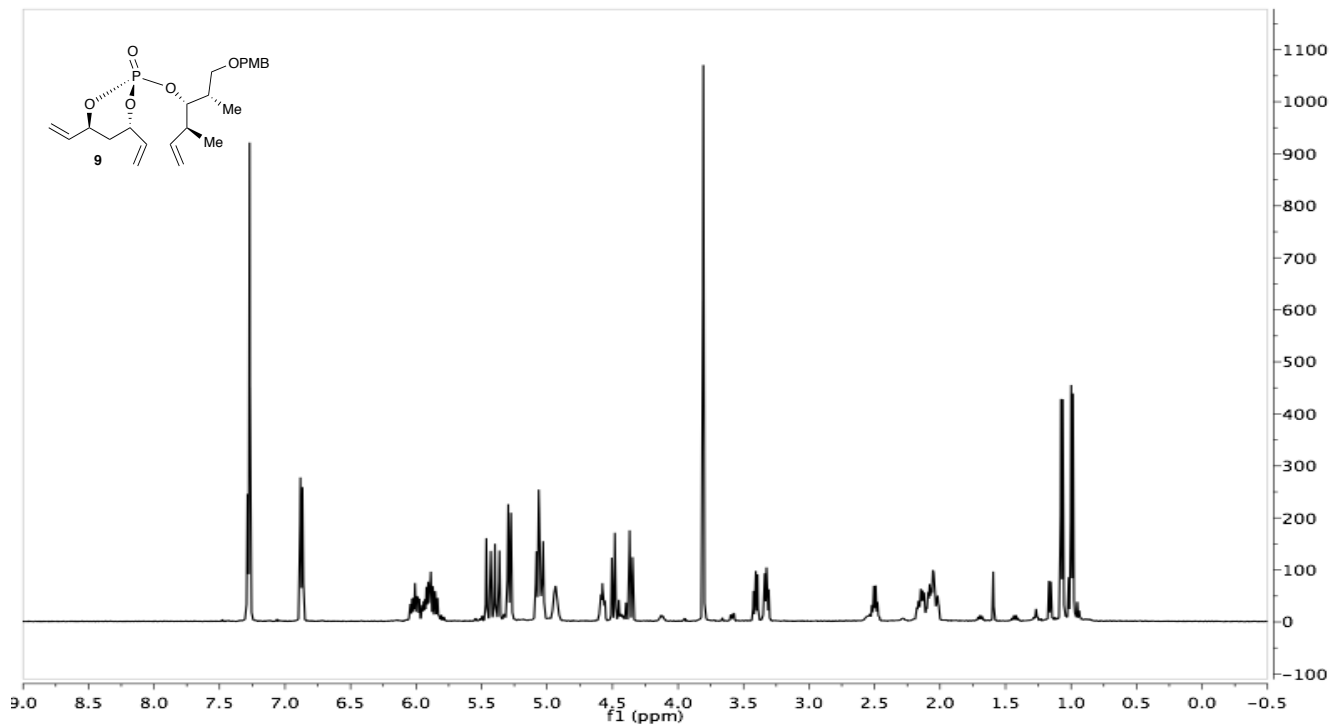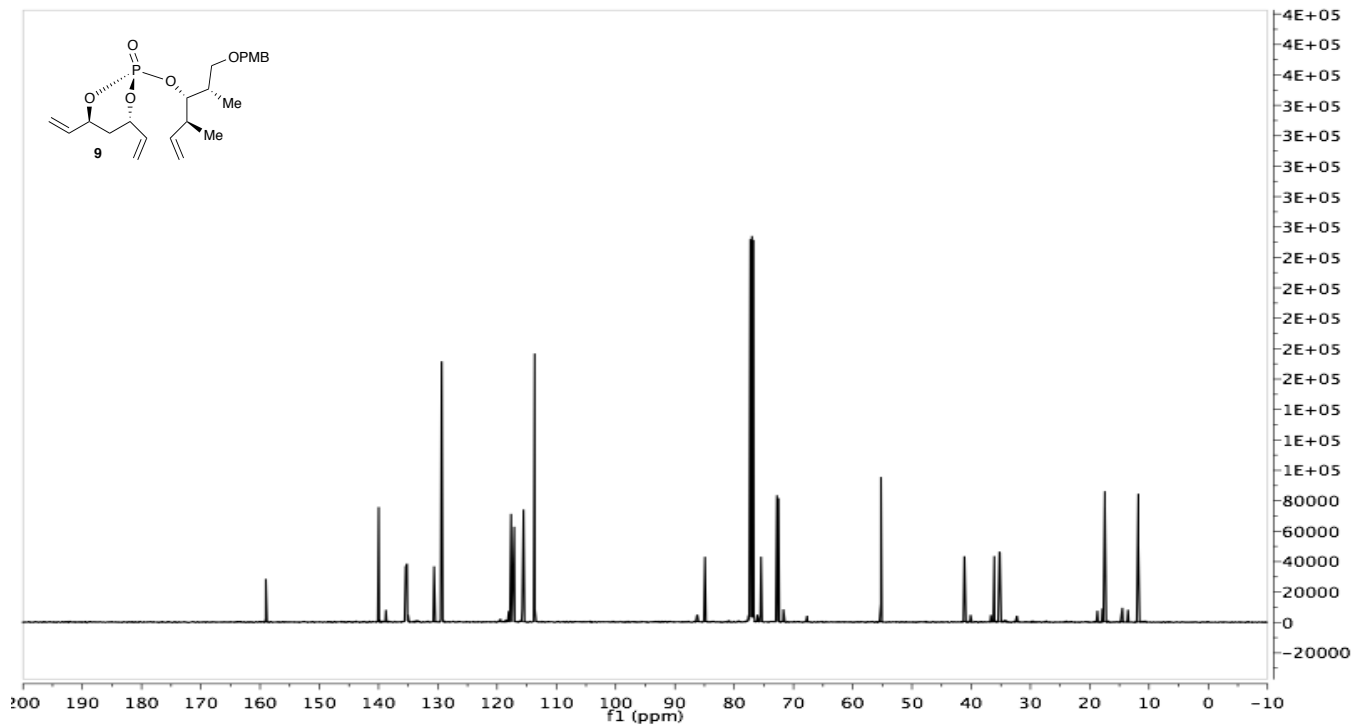



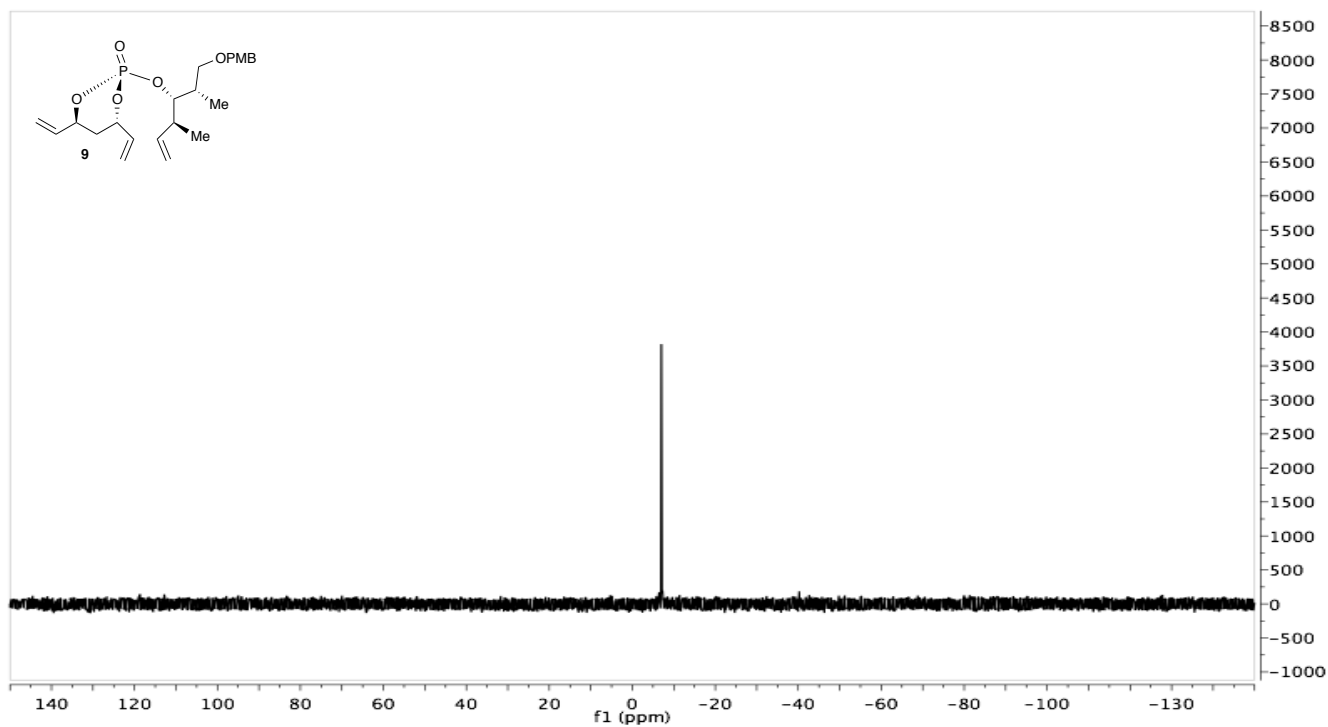

**(4*R*,6*R*)-2-(((2*S*,3*S*,4*S*)-1-((4-methoxybenzyl)oxy)-2,4-dimethylhex-5-en-3-yl)oxy)-4,6-divinyl-1,3,2-dioxaphosphinane 2-oxide (10):**

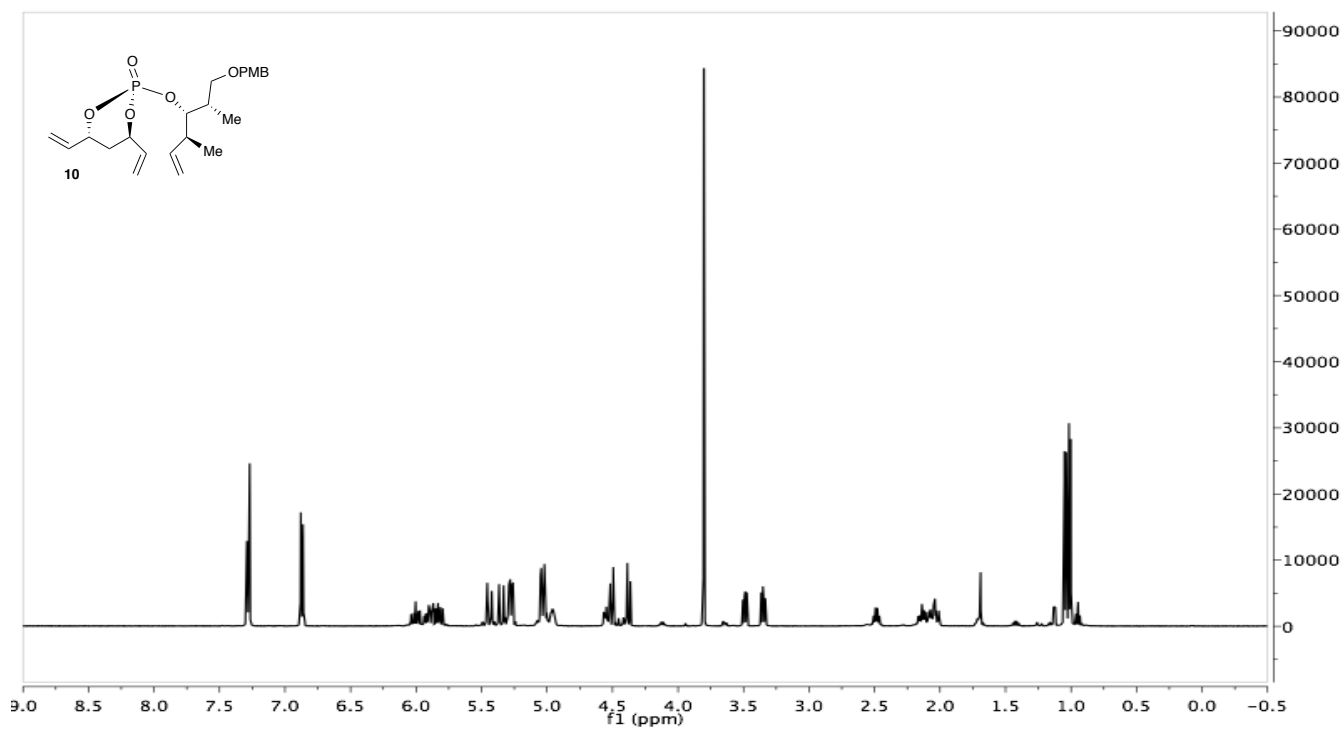

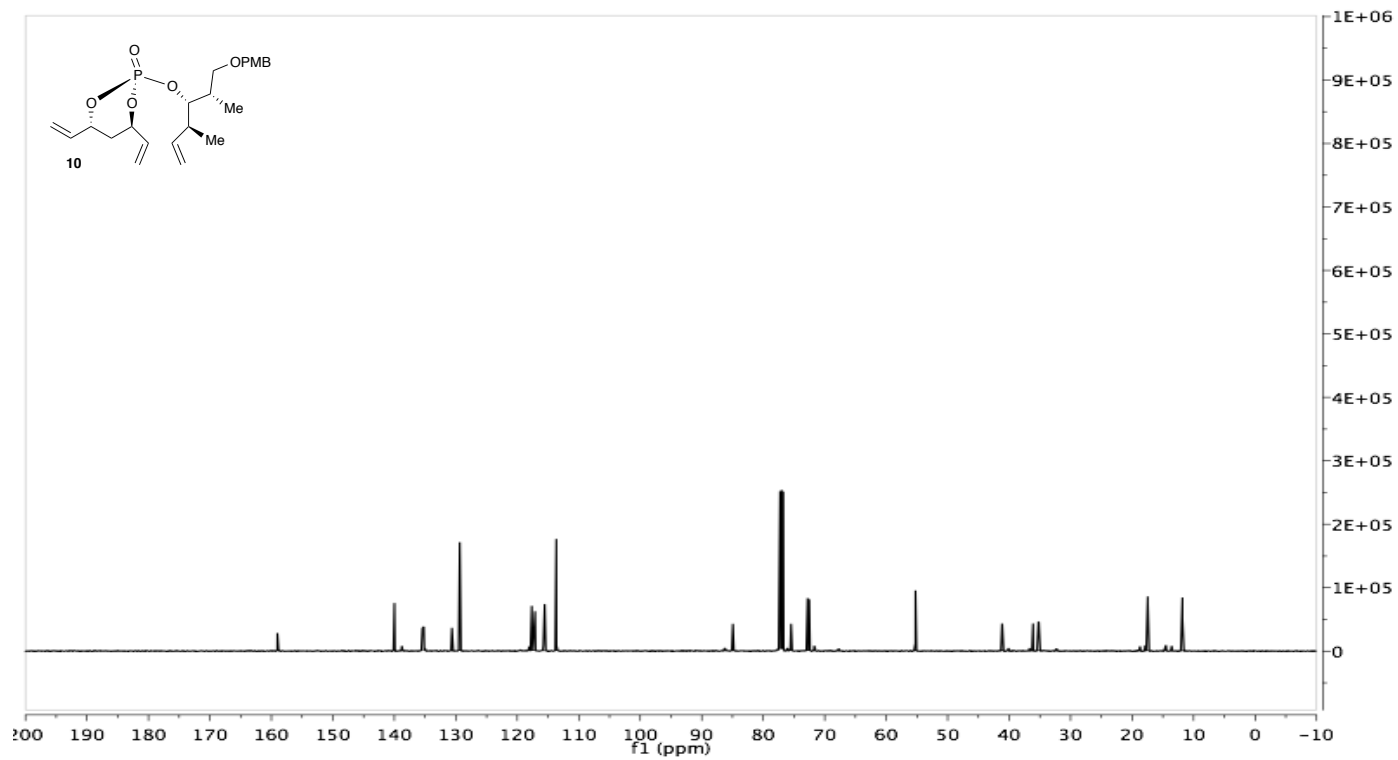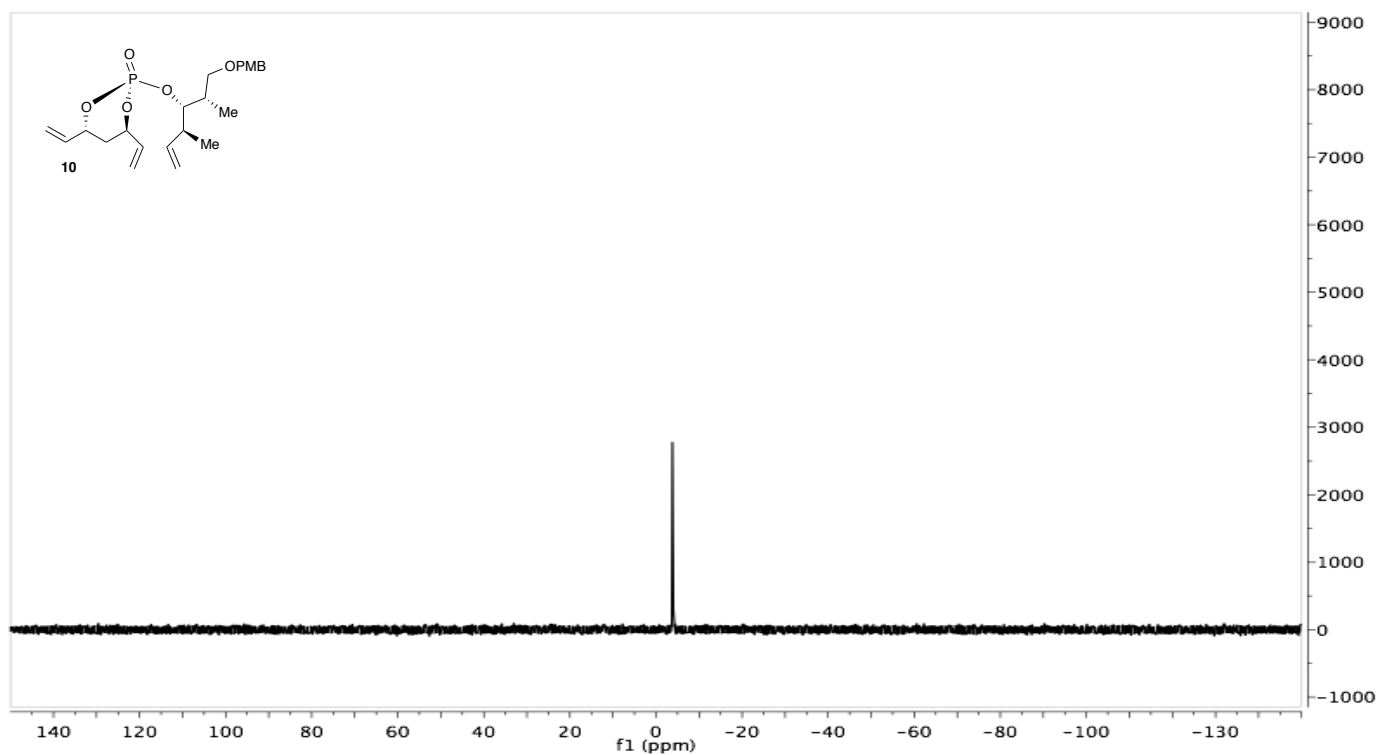

**(1R,3S,4S,7R,9R,Z)-3-((S)-1-((4-methoxybenzyl)oxy)propan-2-yl)-4-methyl-9-vinyl-2,10,11-trioxa-1-phosfabicyclo[5.3.1]undec-5-ene 1-oxide (*trans,anti*-11):**

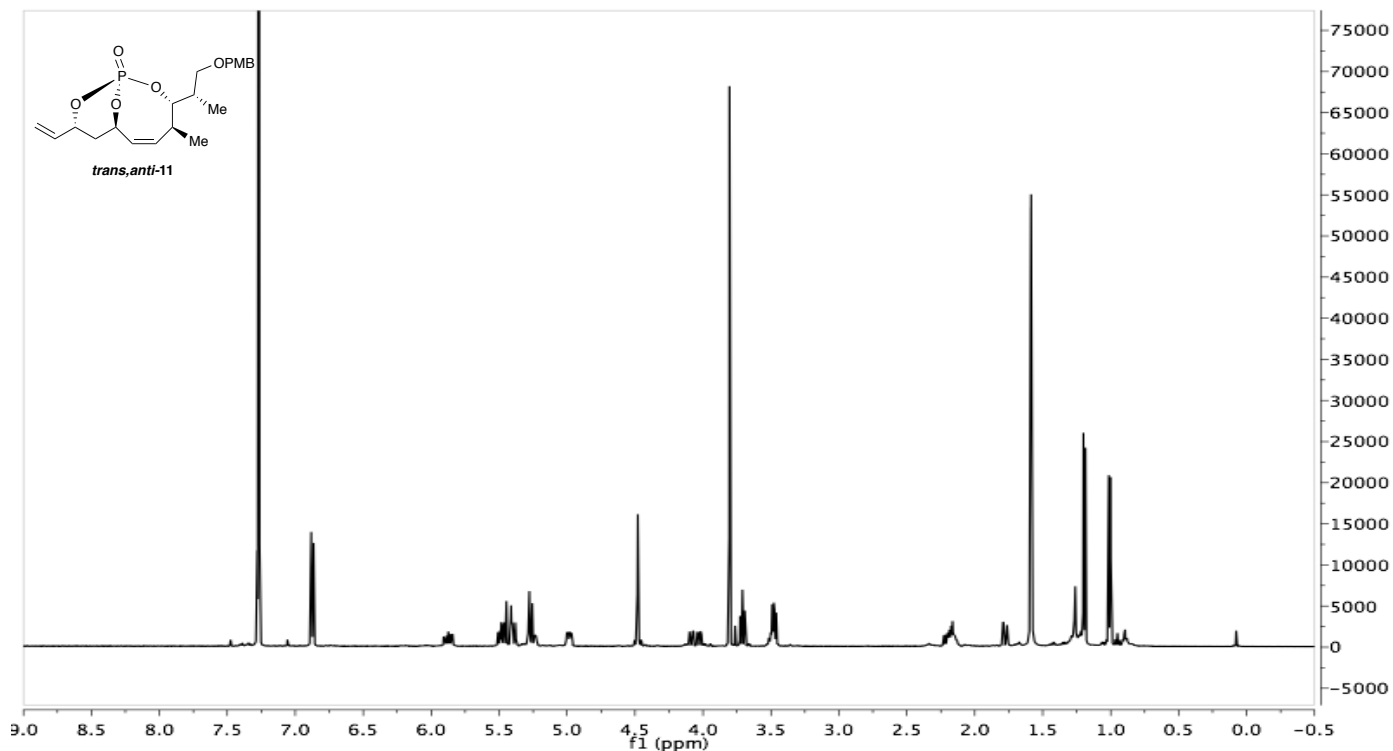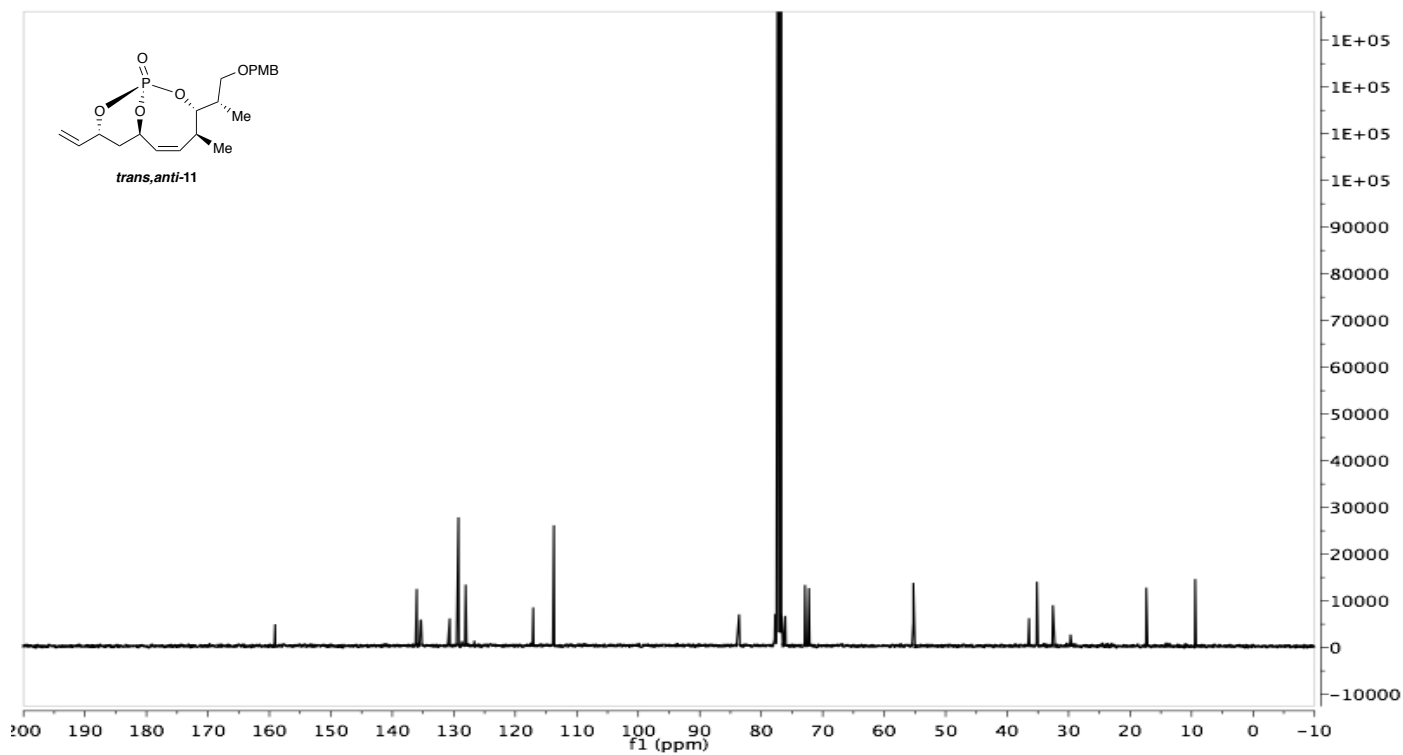

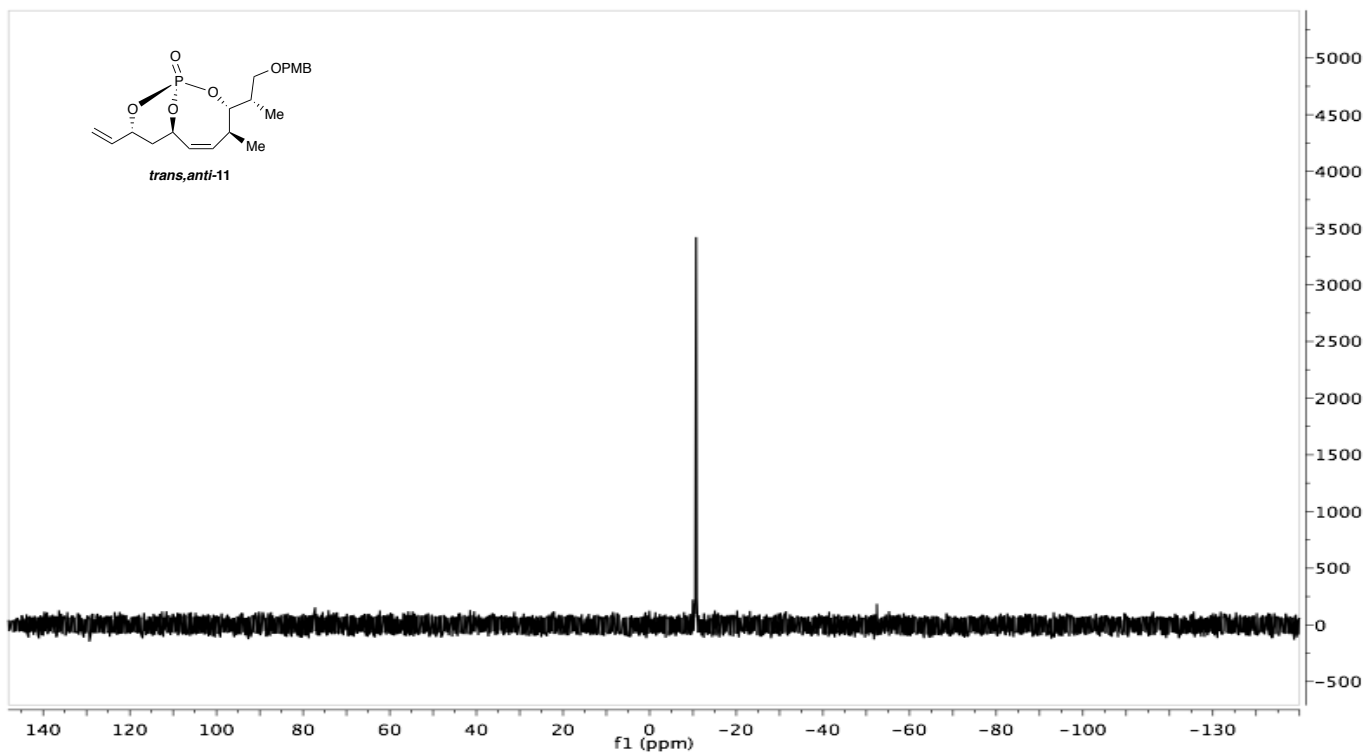

(4*S*,6*S*)-2-(((2*S*,3*S*,4*S*)-3-hydroxy-2,4-dimethylhex-5-en-1-yl)oxy)-4,6-divinyl-1,3,2-dioxaphosphinane 2-oxide  
**(13a):**

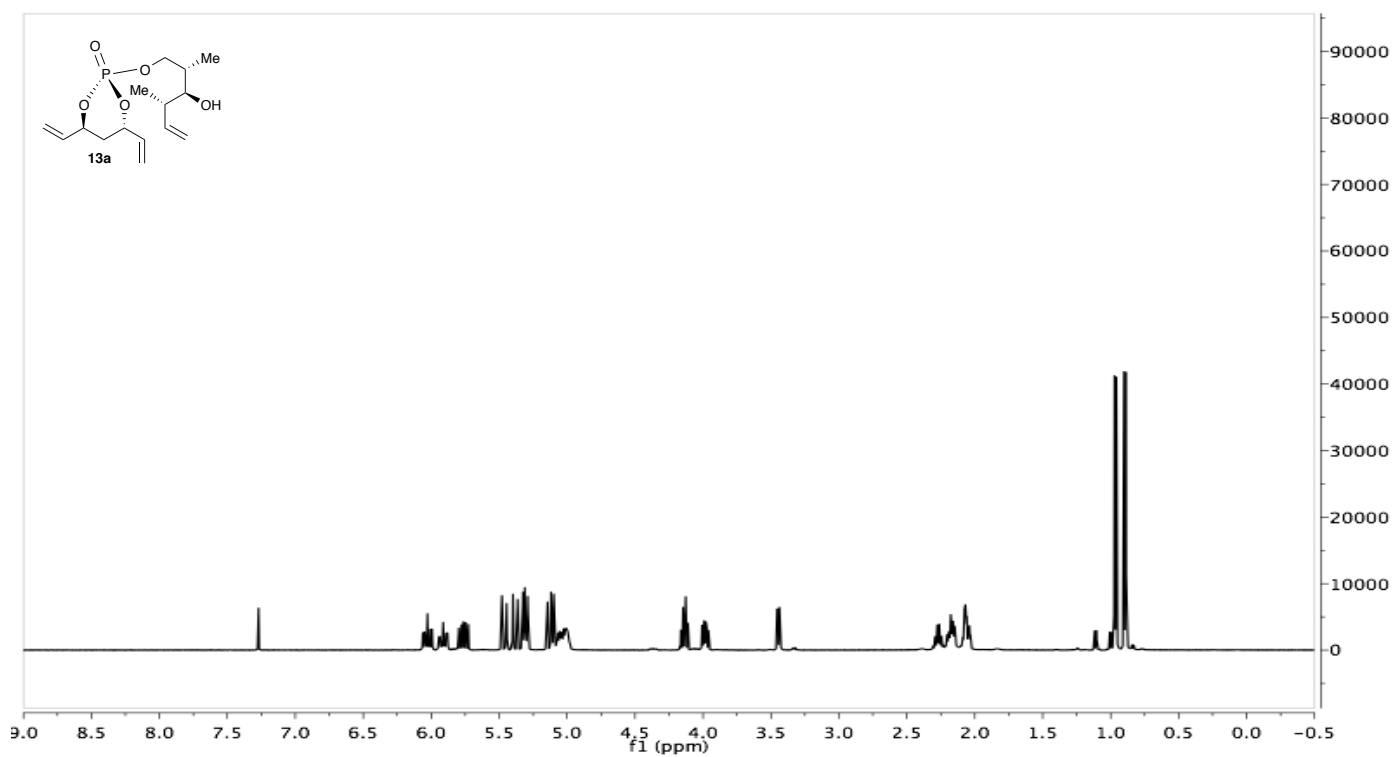

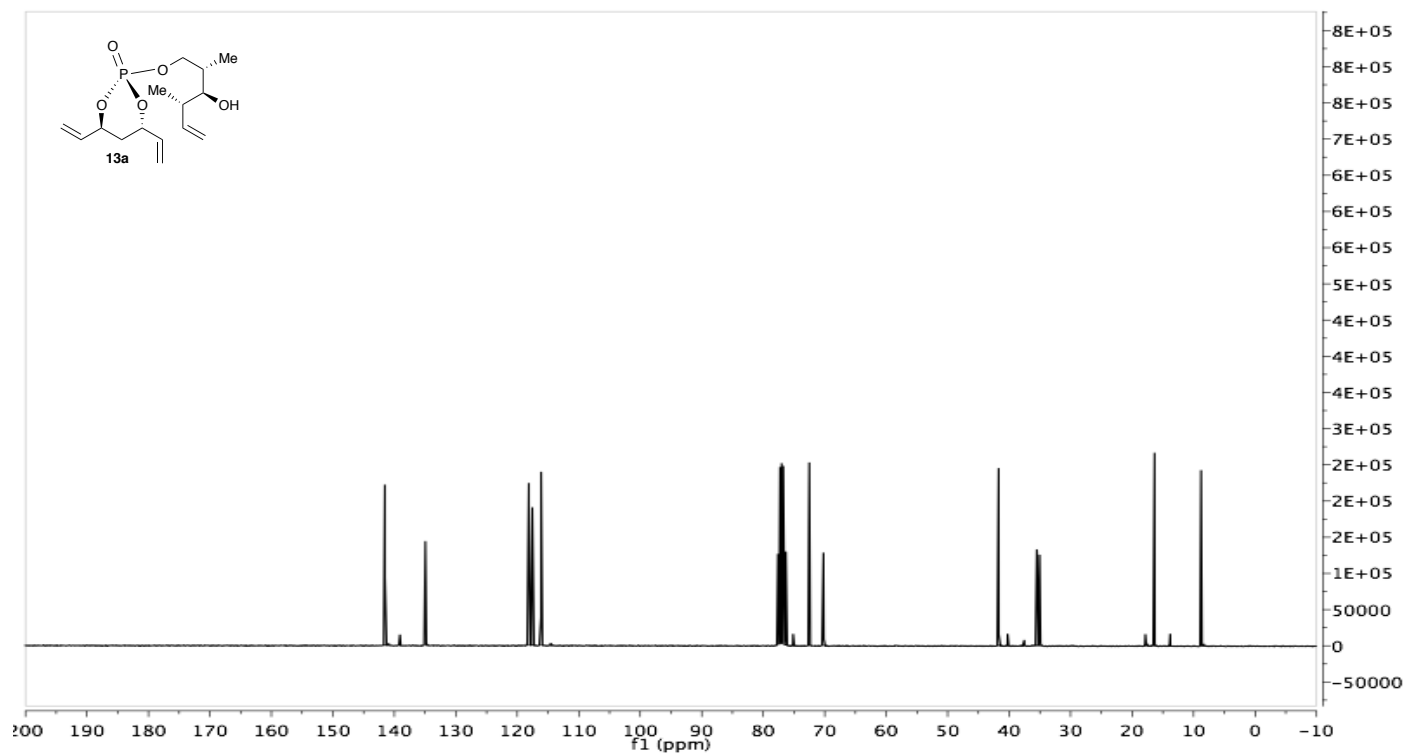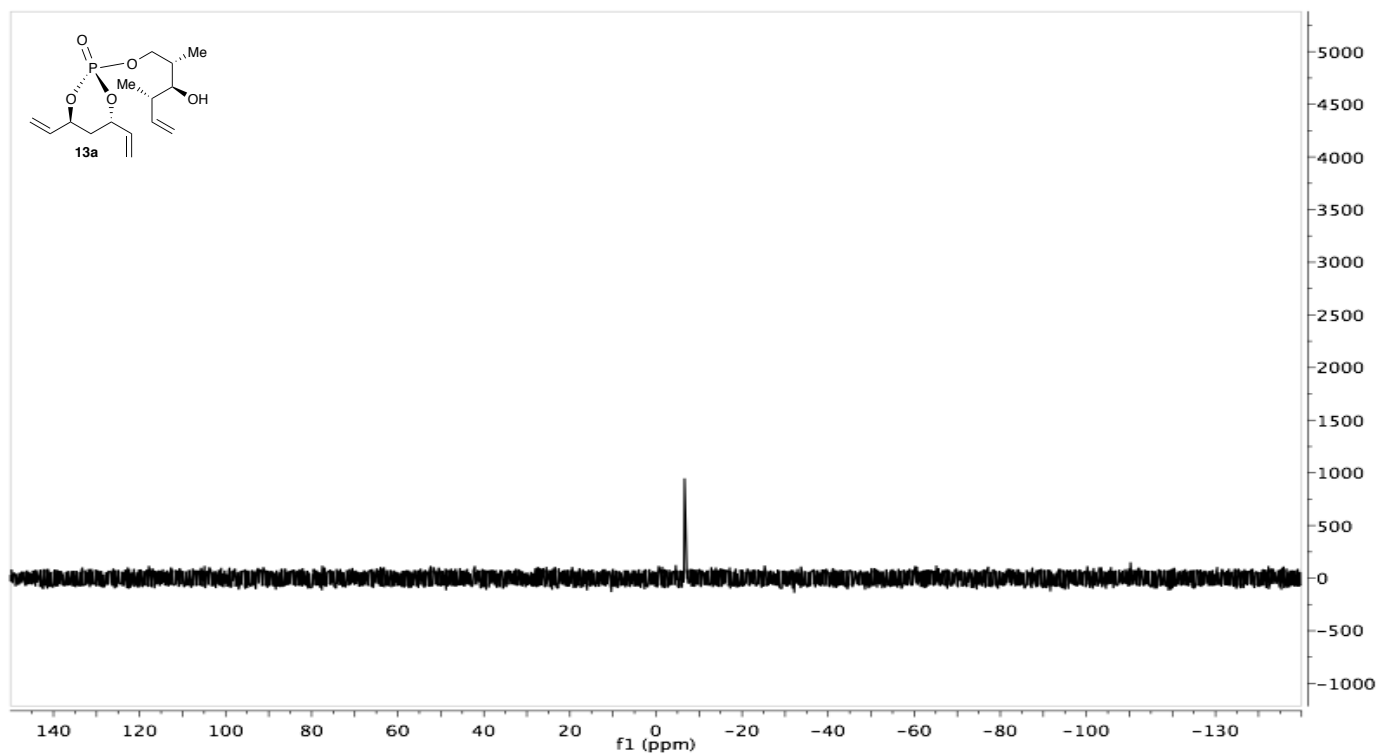

**(1*S*,4*S*,5*S*,6*S*,9*S*,11*S*,*E*)-5-hydroxy-4,6-dimethyl-11-vinyl-2,12,13-trioxa-1-phosphabicyclo[7.3.1]tridec-7-ene  
1-oxide (14a):**

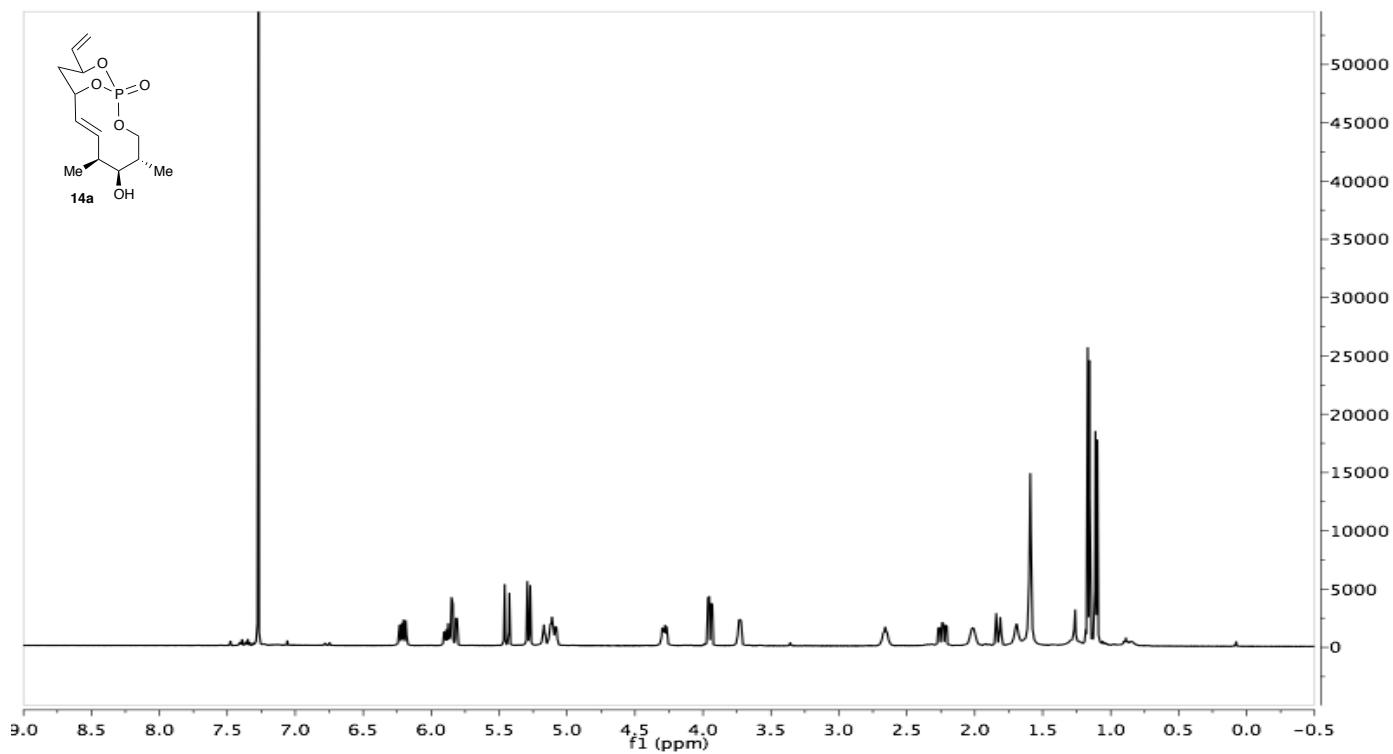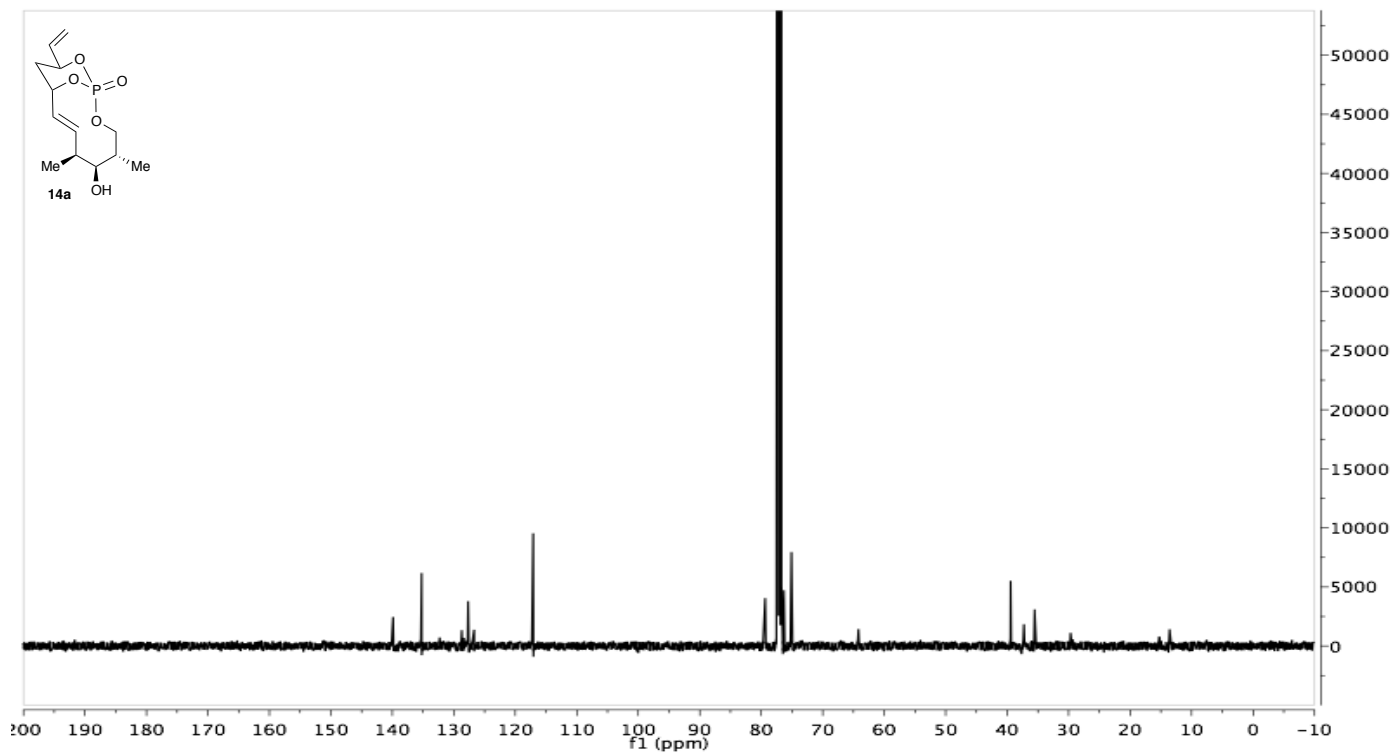

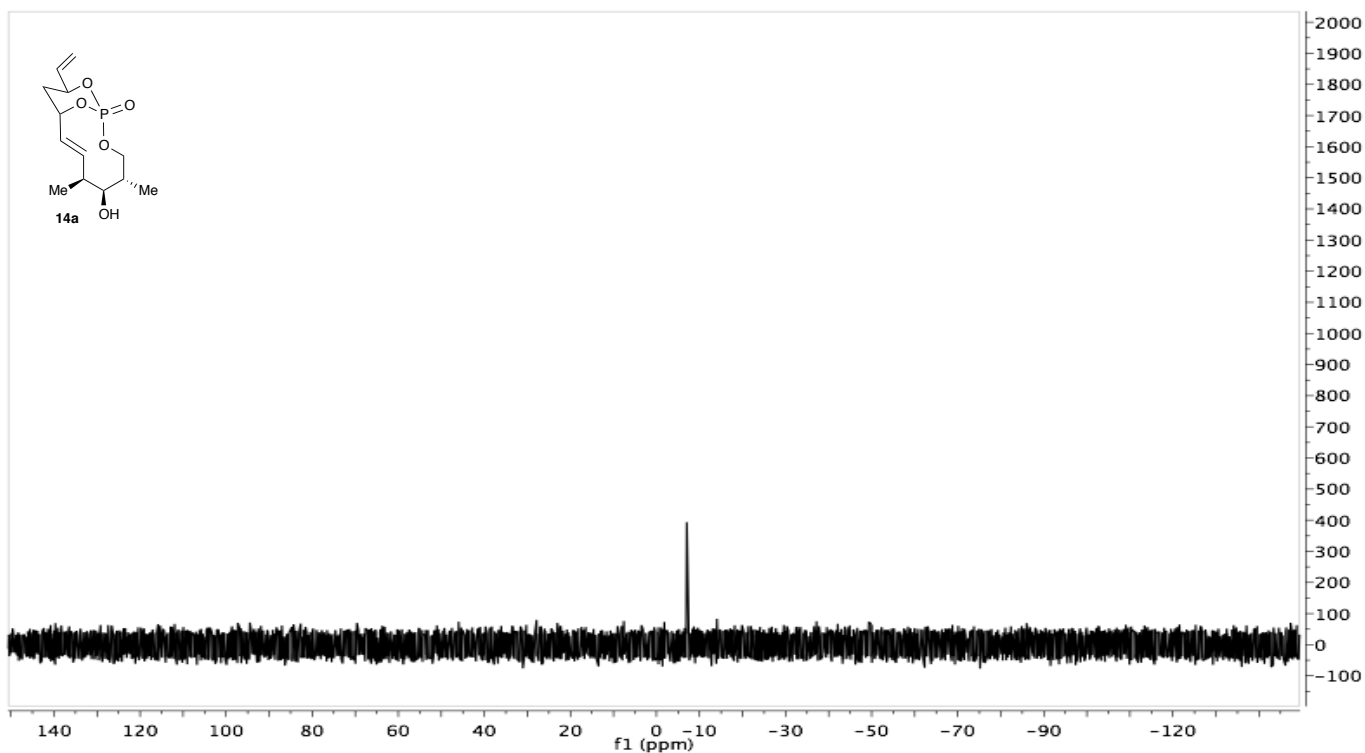

**(4*S*,6*S*)-2-(((2*S*,3*S*,4*S*)-3-((*tert*-butyldimethylsilyl)oxy)-2,4-dimethylhex-5-en-1-yl)oxy)-4,6-divinyl-1,3,2-dioxaphosphinane 2-oxide (13b):**

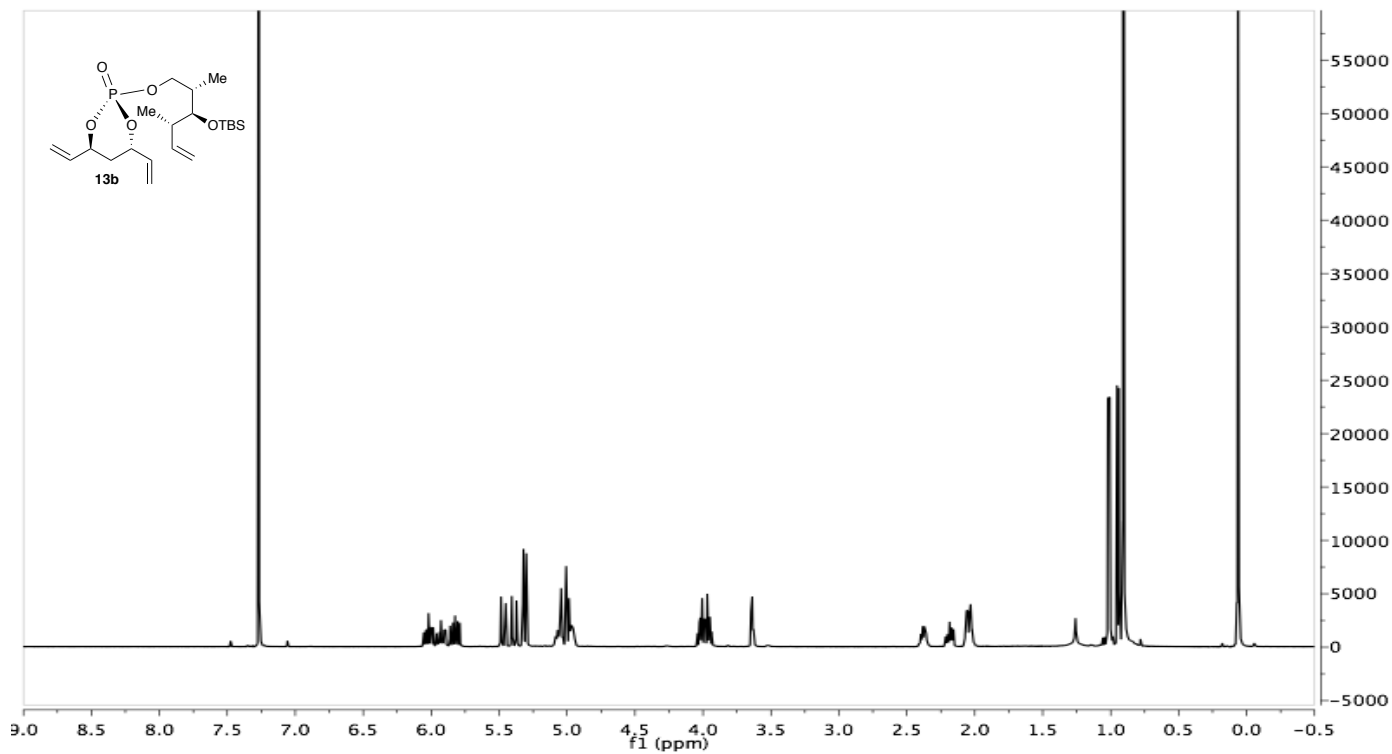

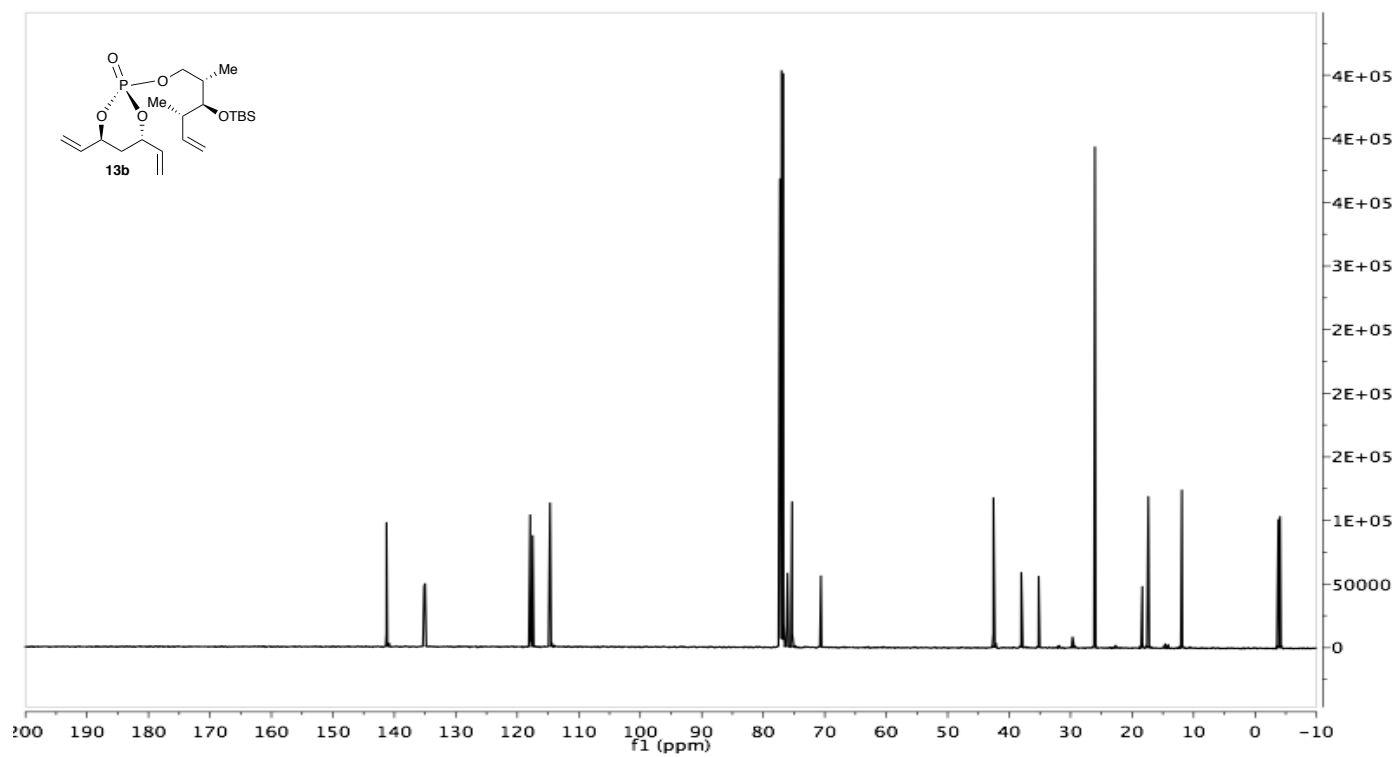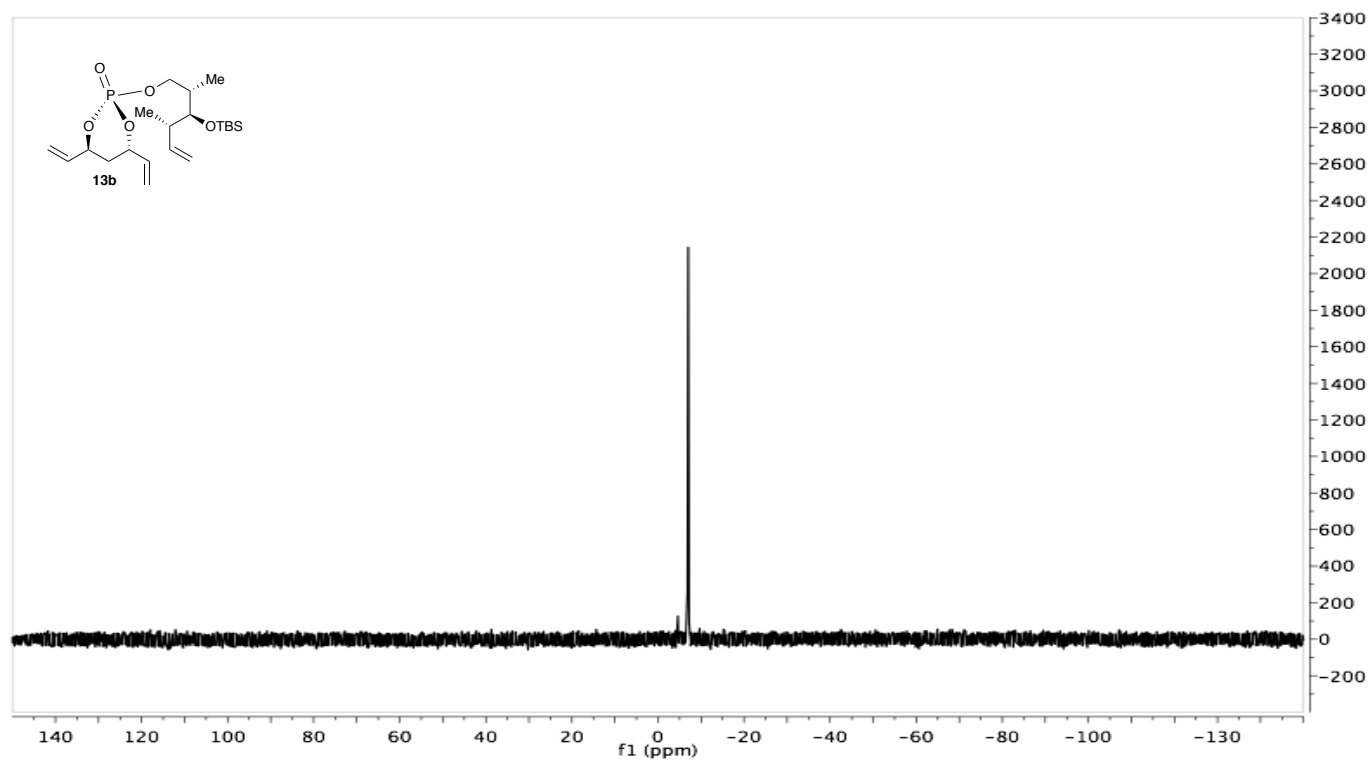



**(1*S*,4*S*,5*S*,6*S*,9*S*,11*S*,*E*)-5-((*tert*-butyldimethylsilyl)oxy)-4,6-dimethyl-11-vinyl-2,12,13-trioxa-1-phosabicyclo[7.3.1]tridec-7-ene 1-oxide (14b):**

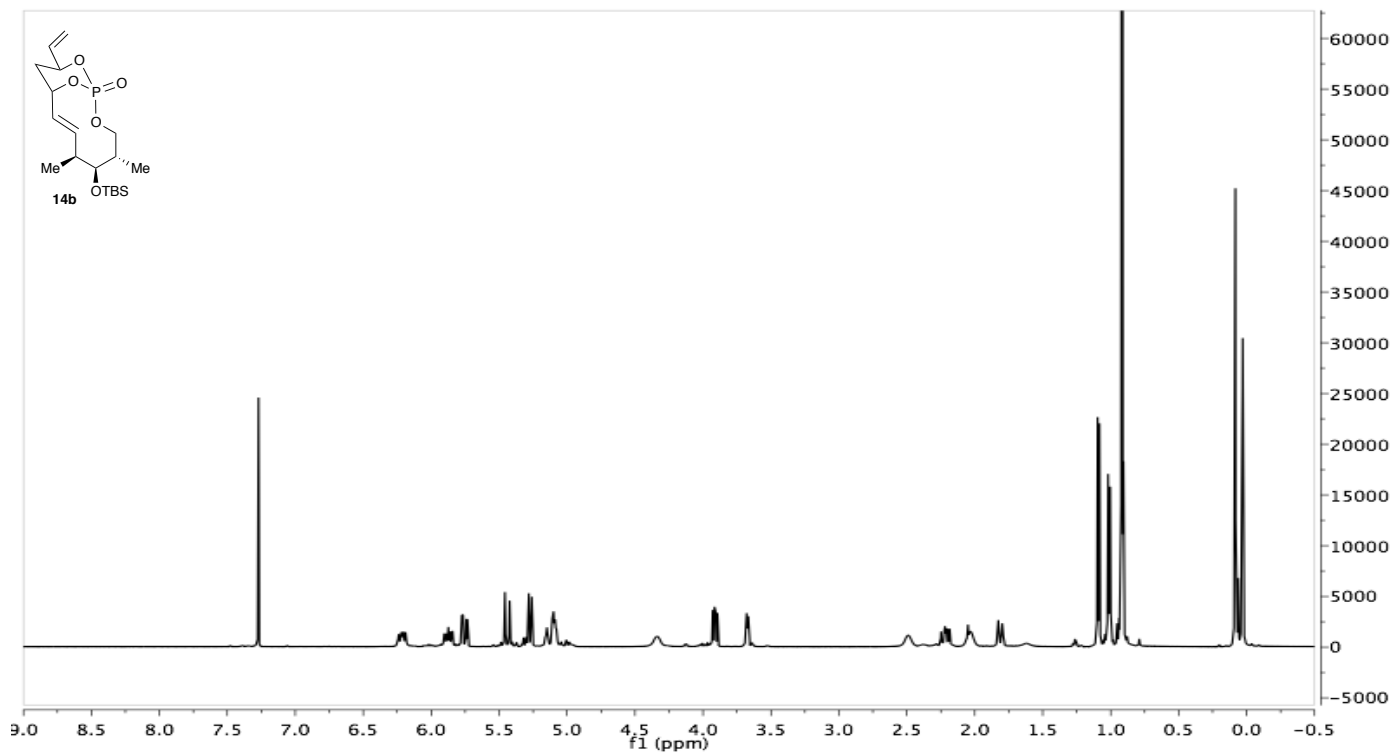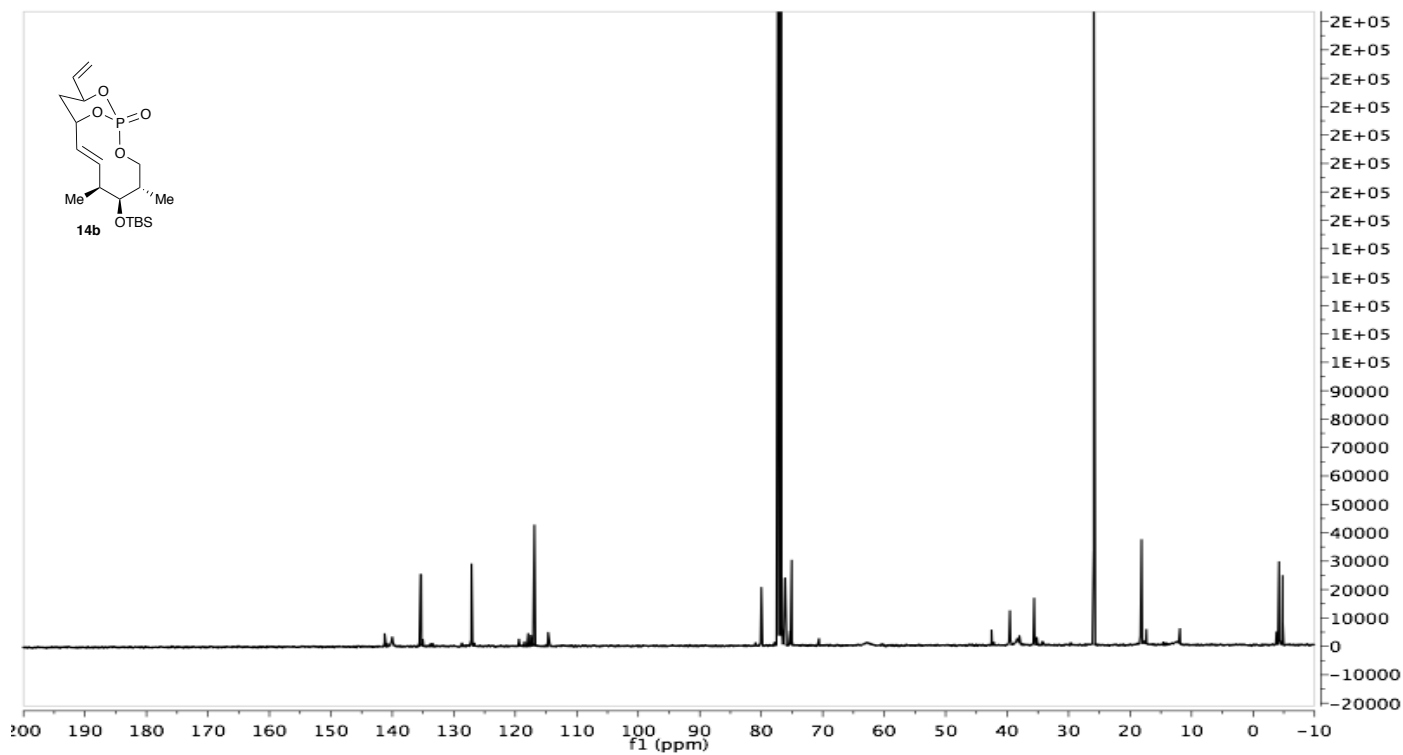

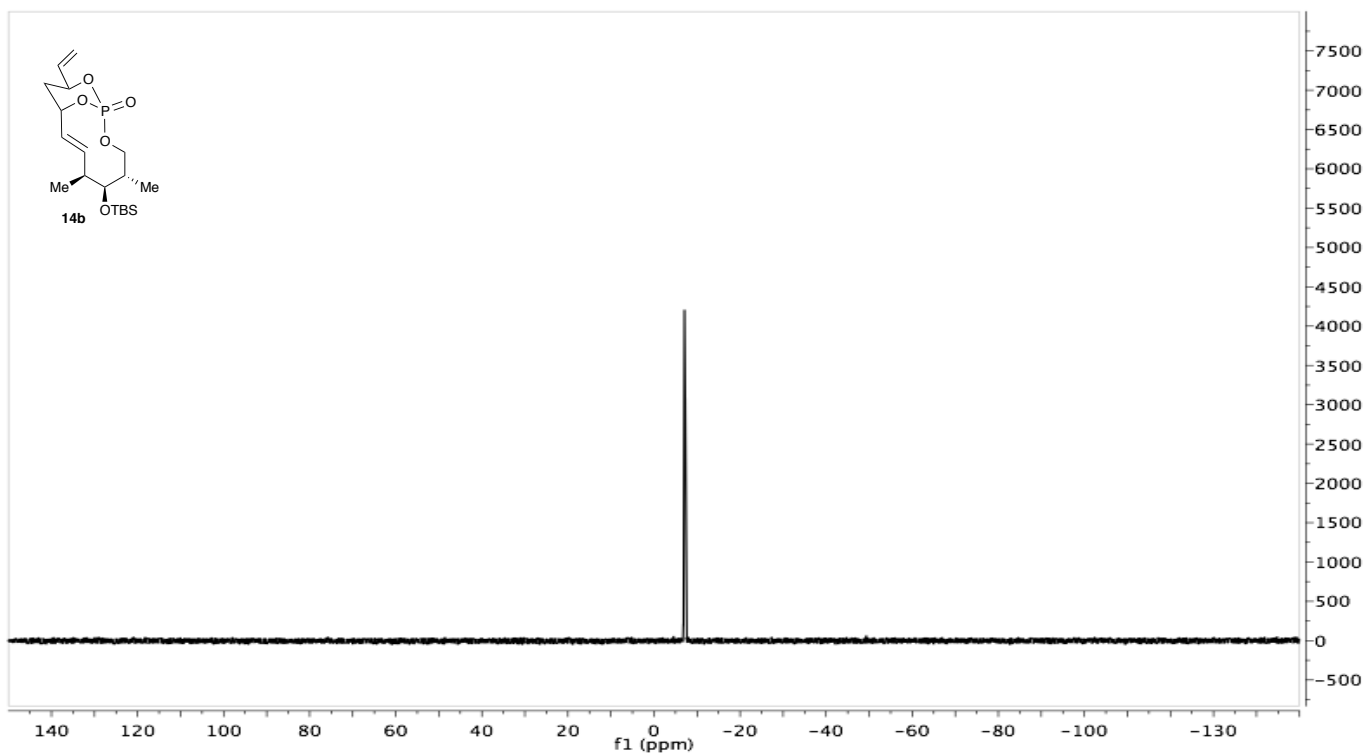

**(4*S*,6*S*)-2-(((2*S*,3*S*,4*S*)-3-(methoxymethoxy)-2,4-dimethylhex-5-en-1-yl)oxy)-4,6-divinyl-1,3,2-dioxaphosphinane 2-oxide (13c):**

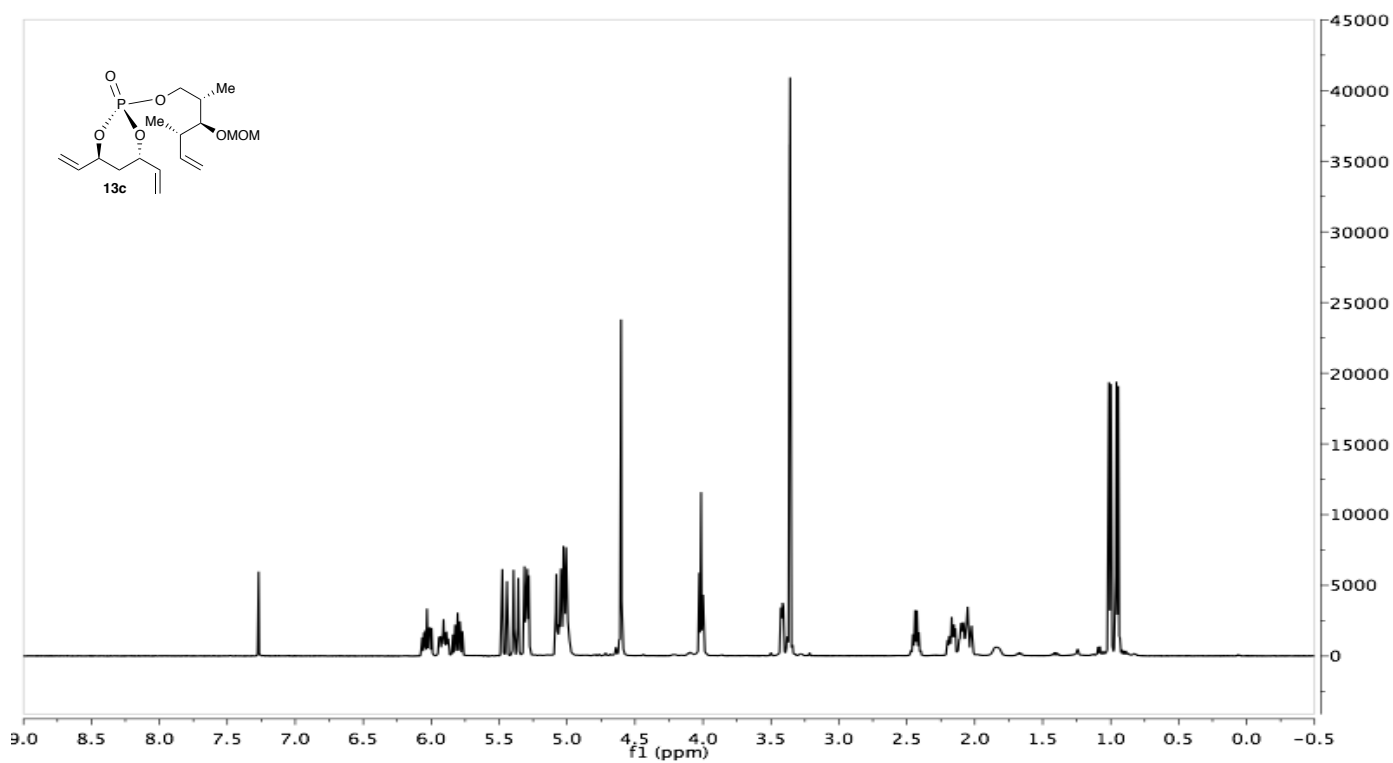

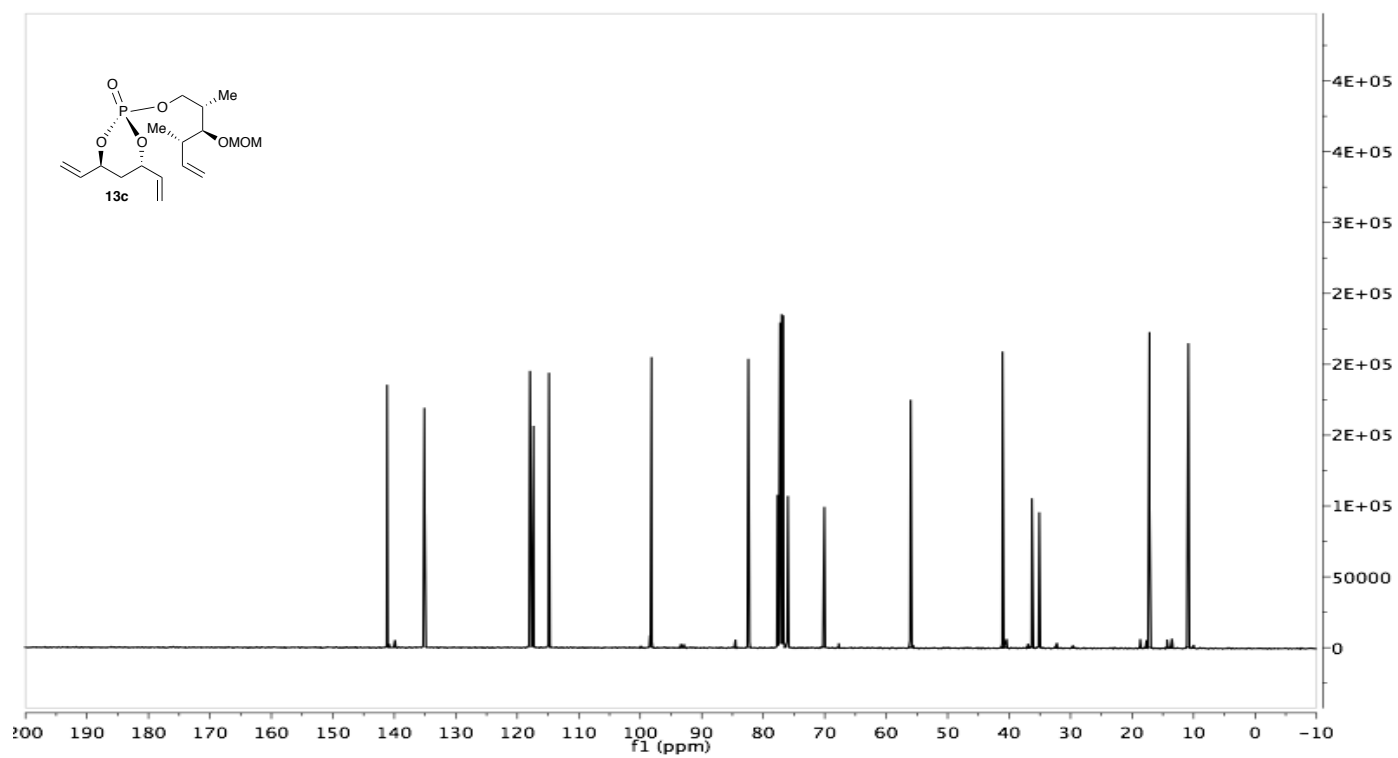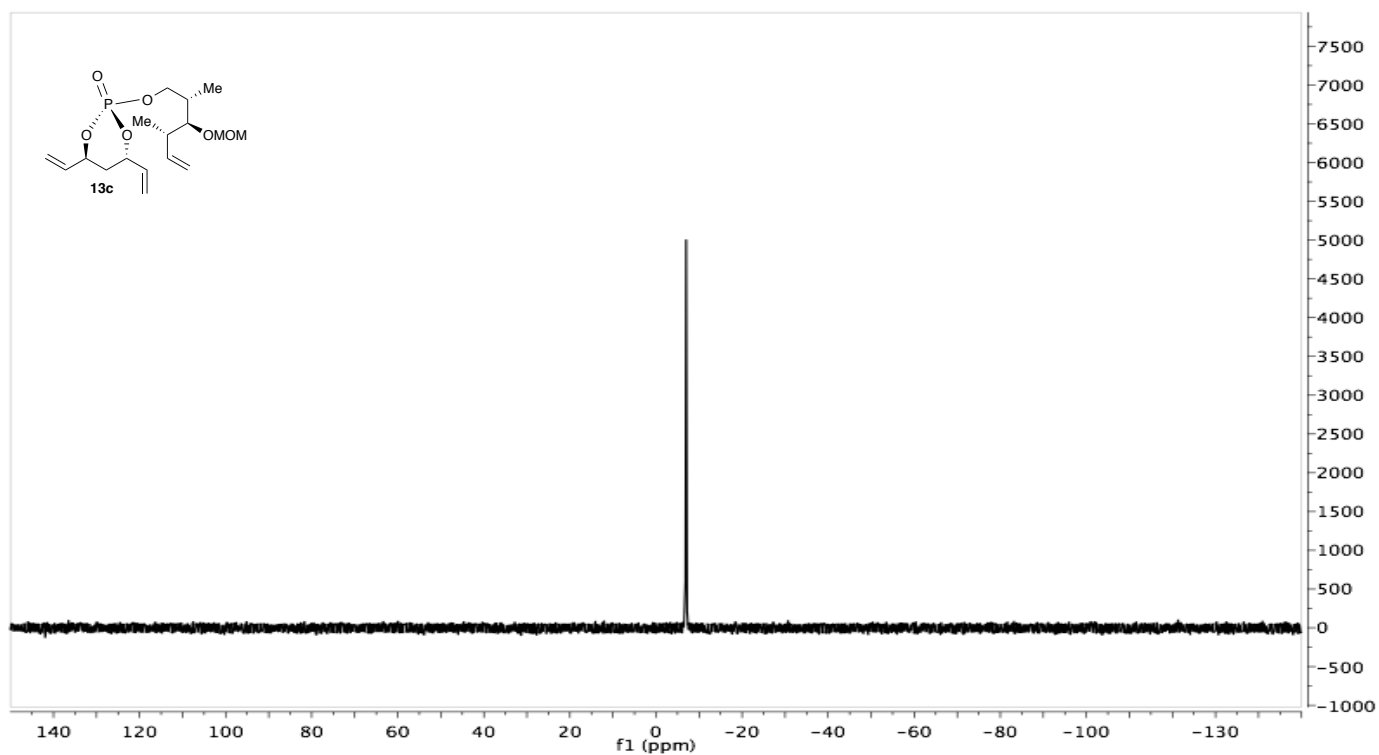

**(1*S*,4*S*,5*S*,6*S*,9*S*,11*S*,*E*)-5-(methoxymethoxy)-4,6-dimethyl-11-vinyl-2,12,13-trioxa-1-phosfabicyclo[7.3.1]tridec-7-ene 1-oxide (14c):**

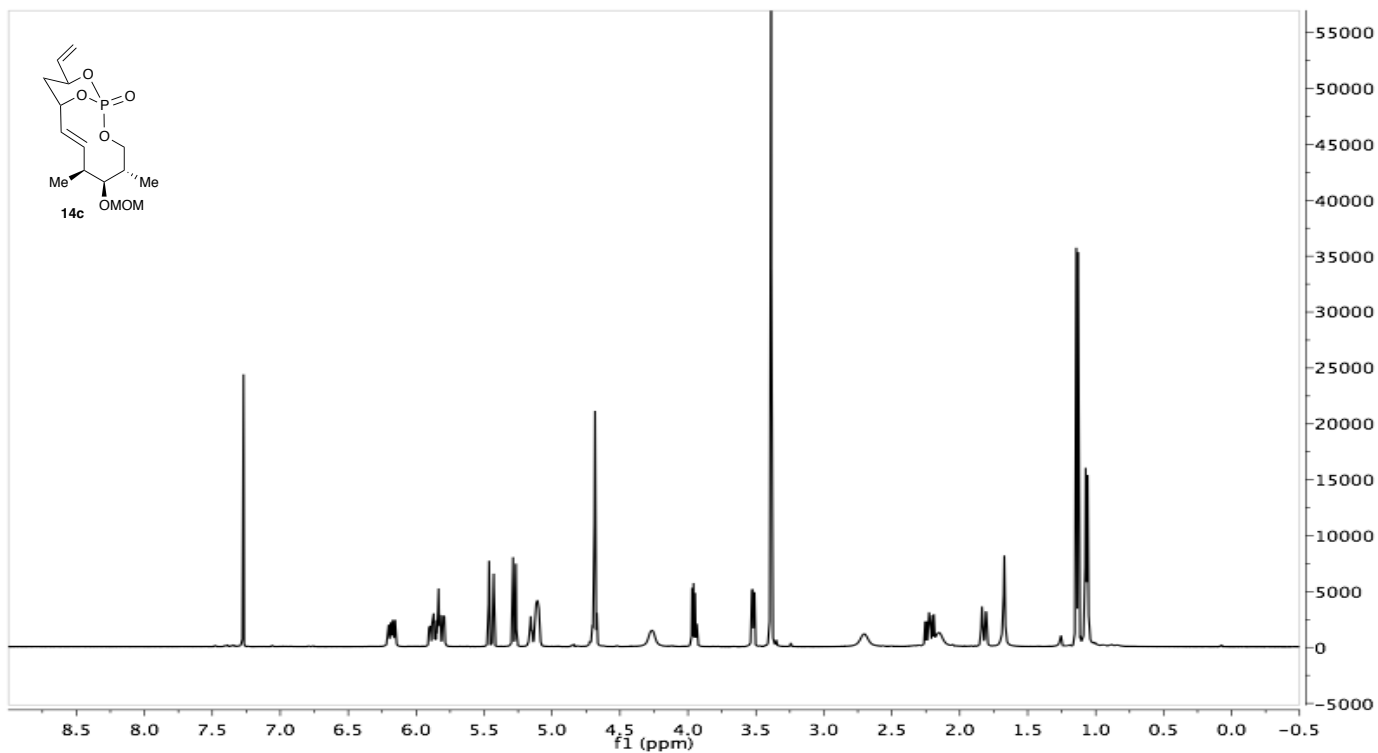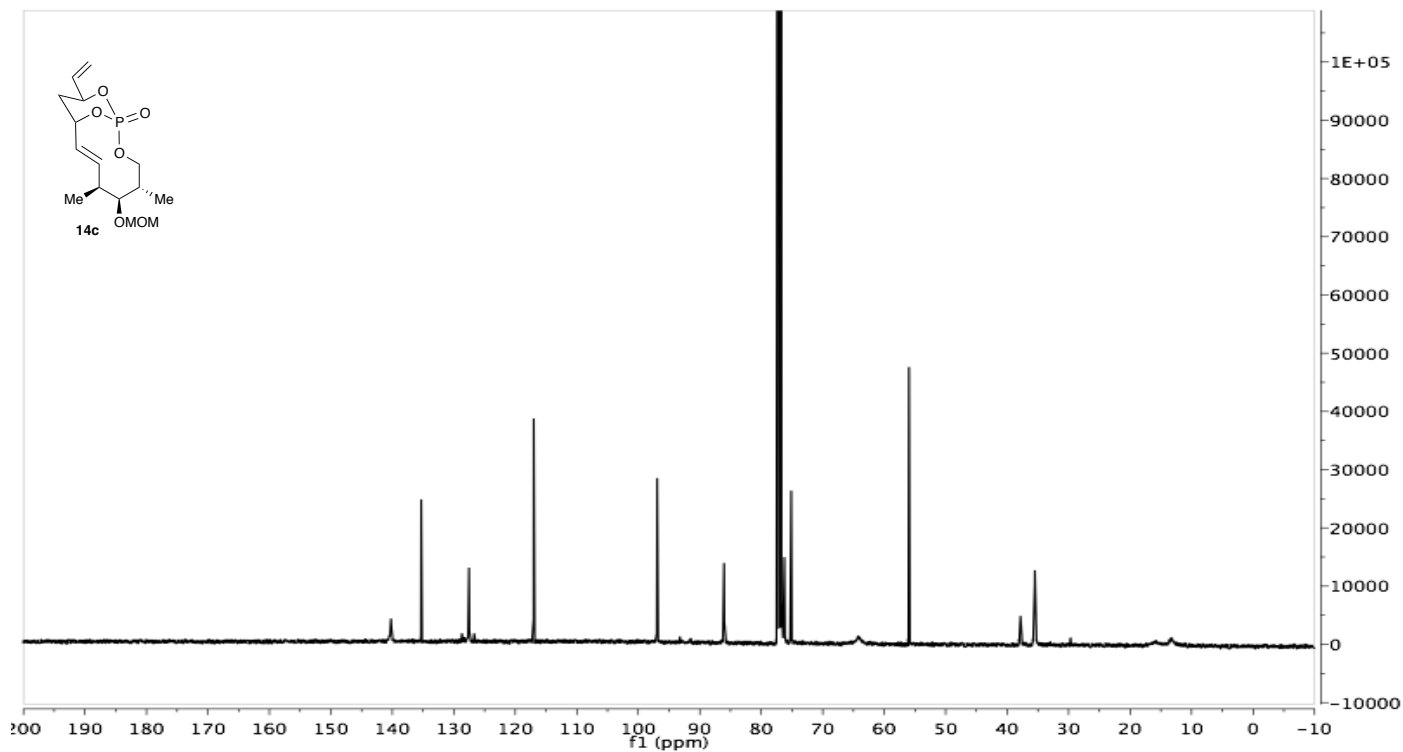

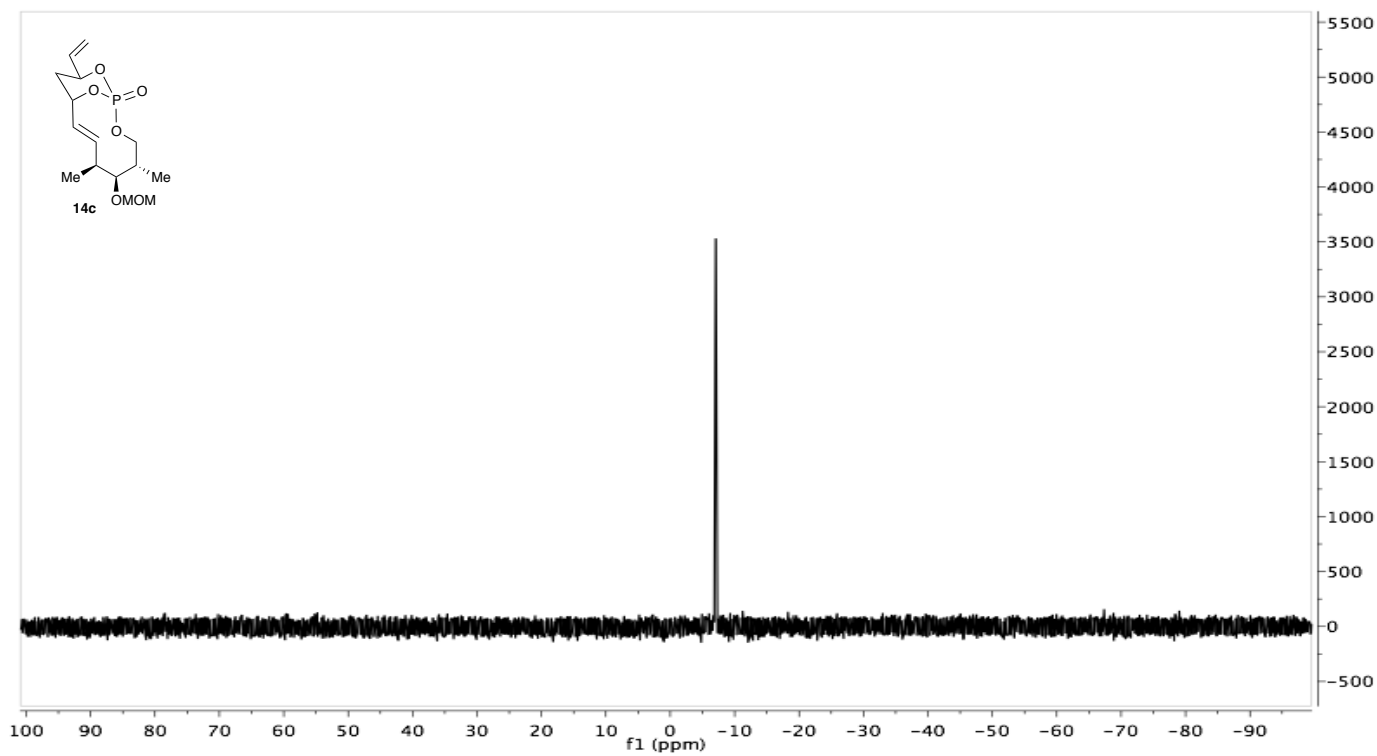

**(4*R*,6*R*)-2-(((2*S*,3*S*,4*S*)-3-((4-methoxybenzyl)oxy)-2,4-dimethylhex-5-en-1-yl)oxy)-4,6-divinyl-1,3,2-dioxaphosphinane 2-oxide (15):**

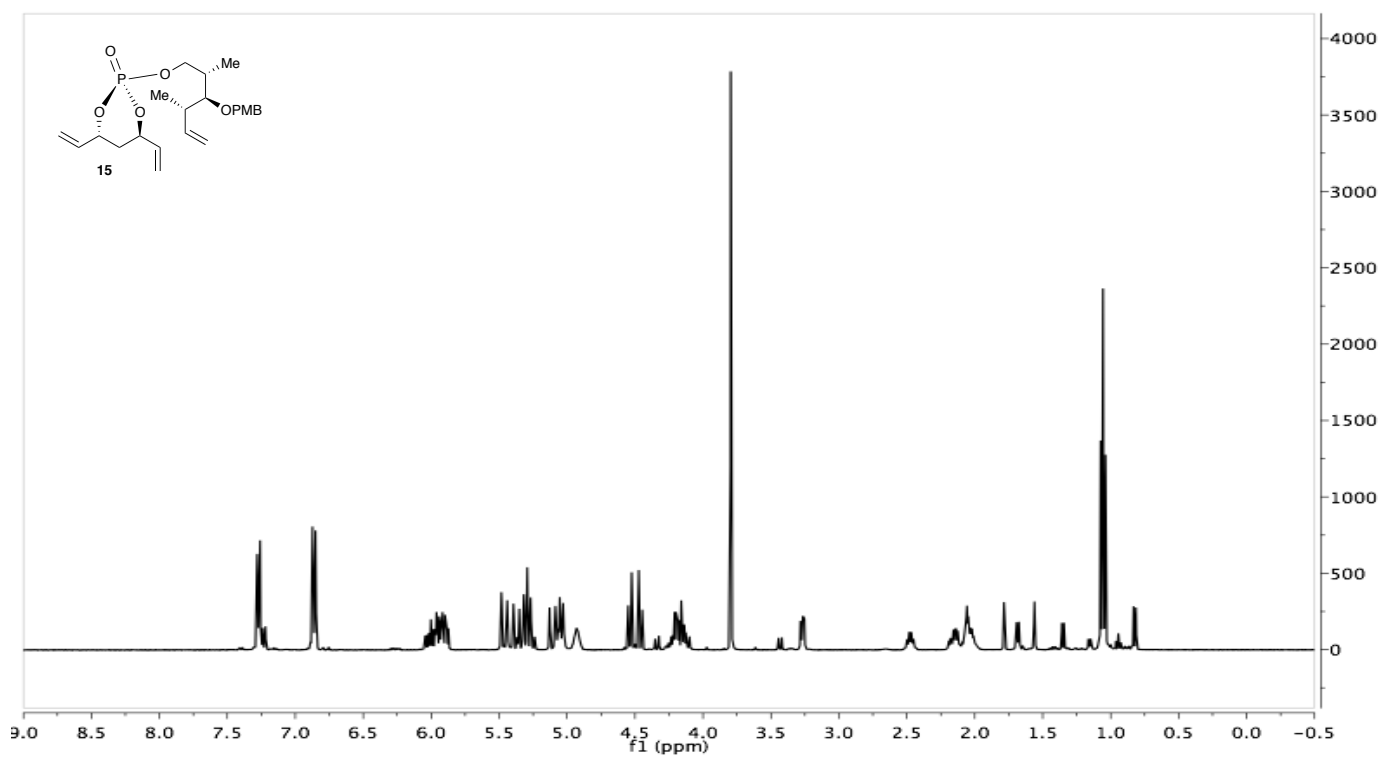



**(1*R*,4*S*,5*S*,6*S*,9*R*,11*R*,*E*)-5-((4-methoxybenzyl)oxy)-4,6-dimethyl-11-vinyl-2,12,13-trioxa-1-phosphabicyclo[7.3.1]tridec-7-ene 1-oxide (16):**

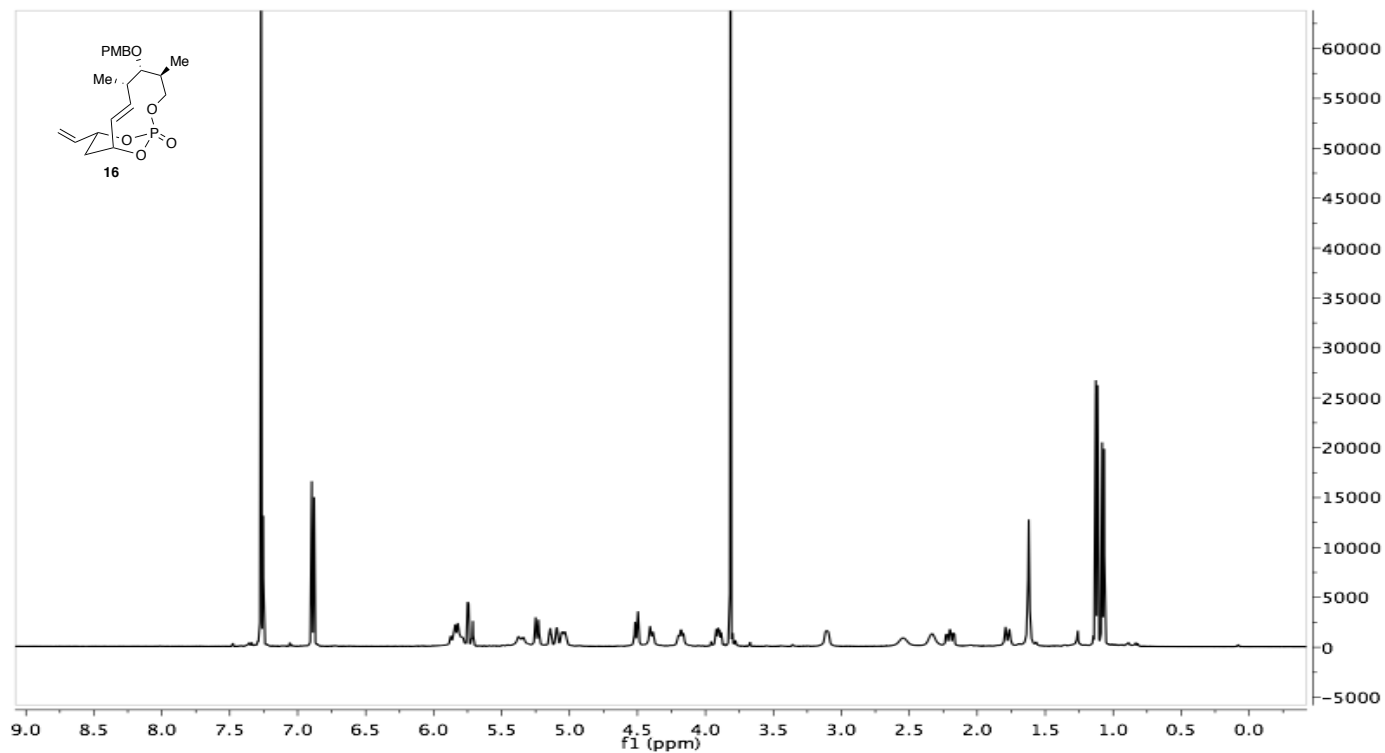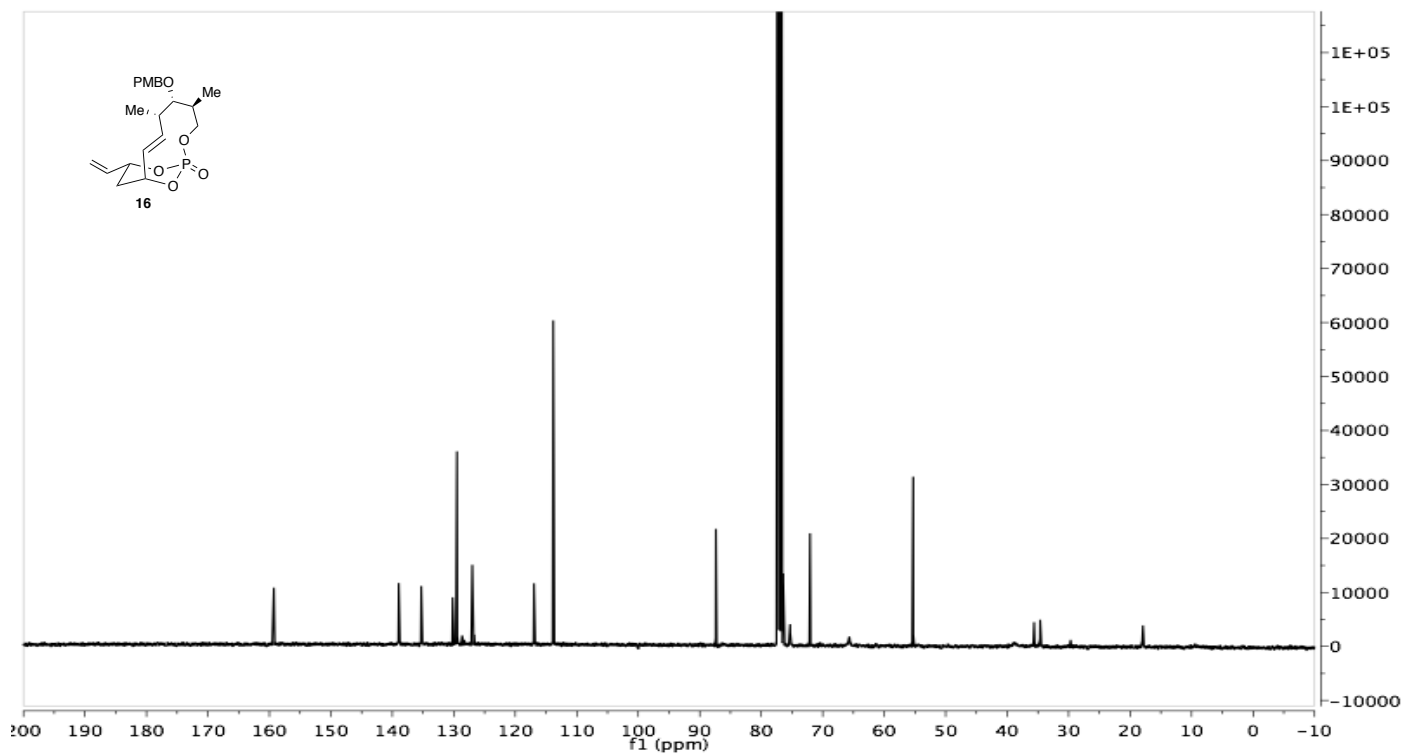

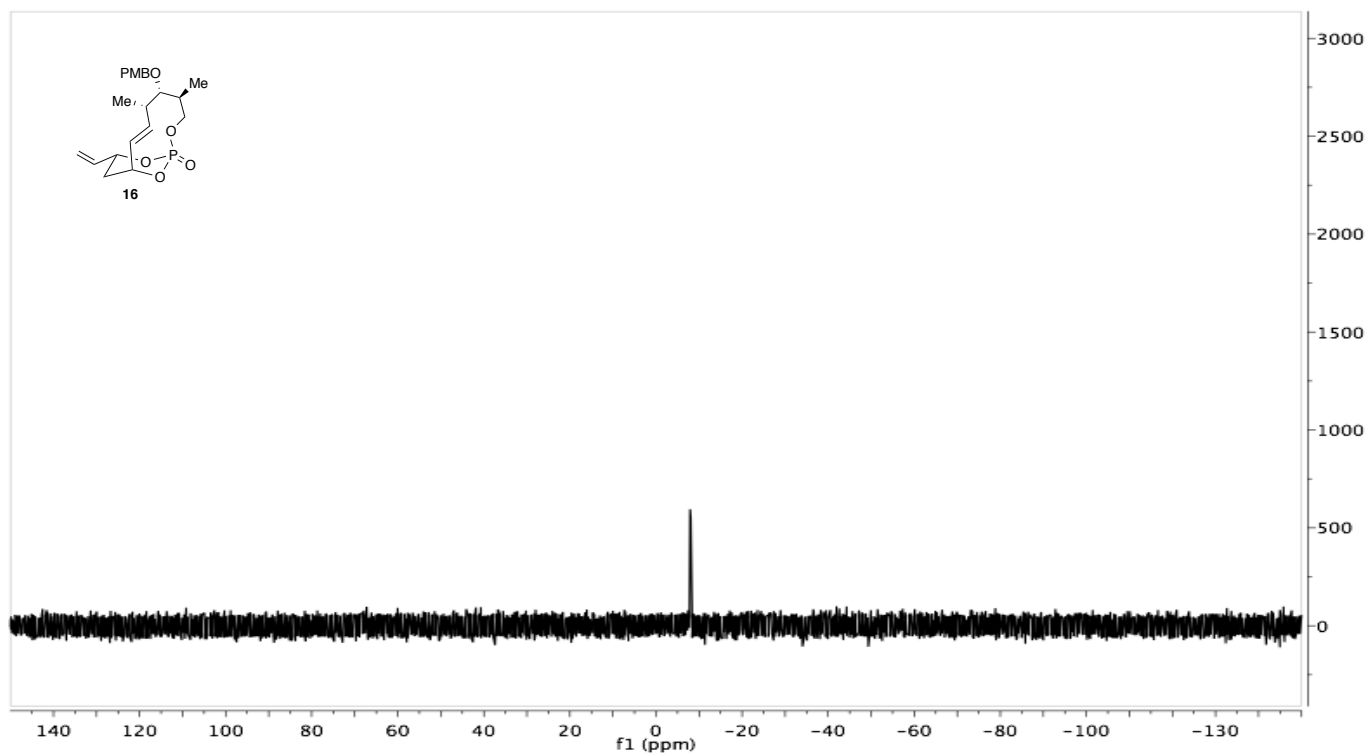

**(4*S*,6*S*)-2-(((*R*)-1-(benzyloxy)but-3-en-2-yl)oxy)-4,6-divinyl-1,3,2-dioxaphosphinane 2-oxide (18):**

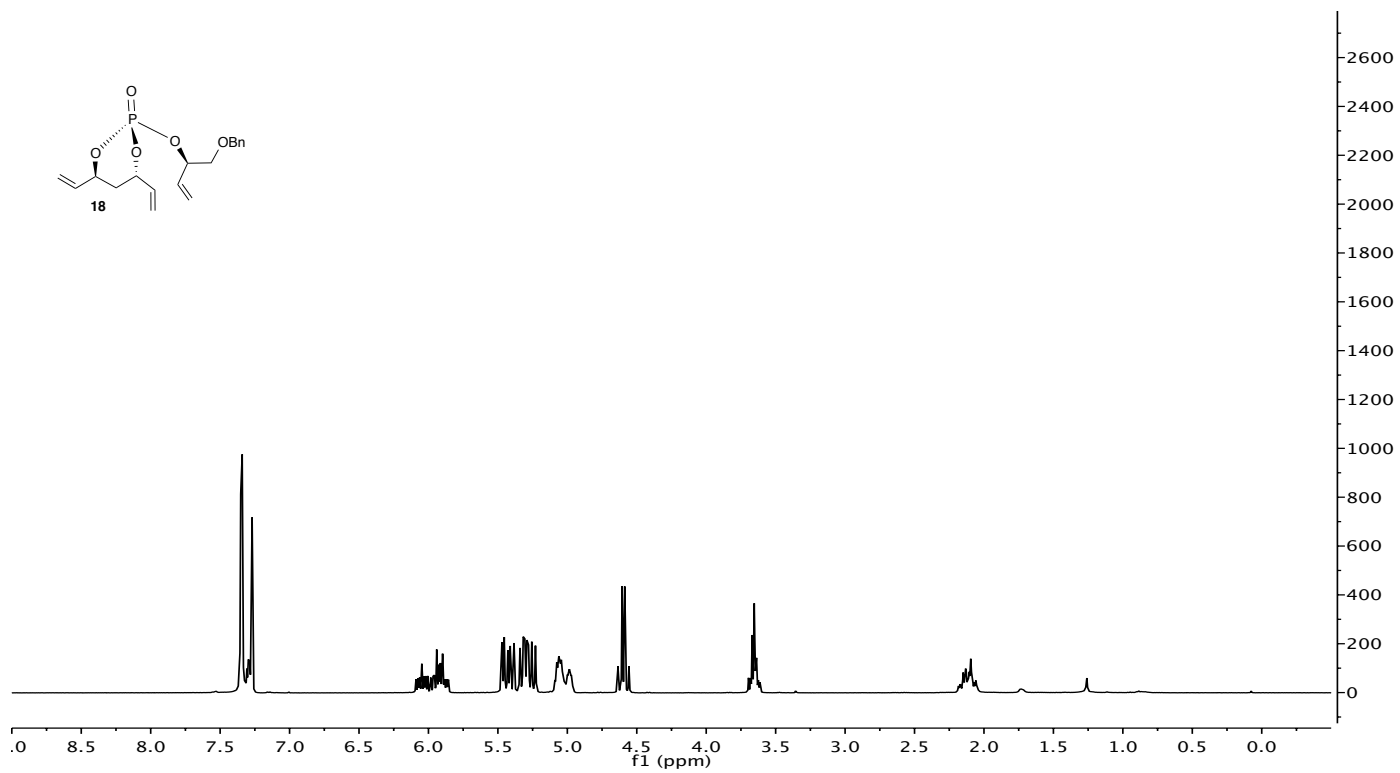



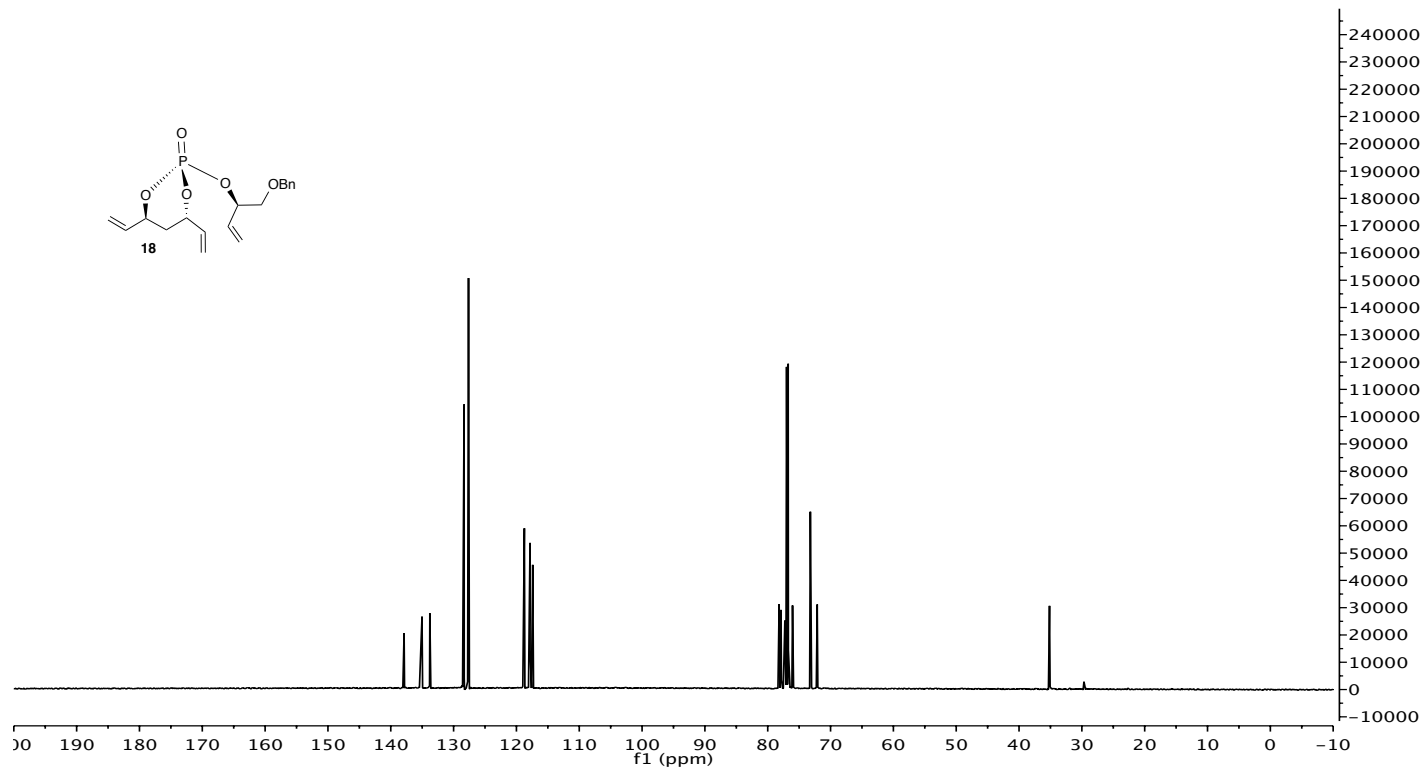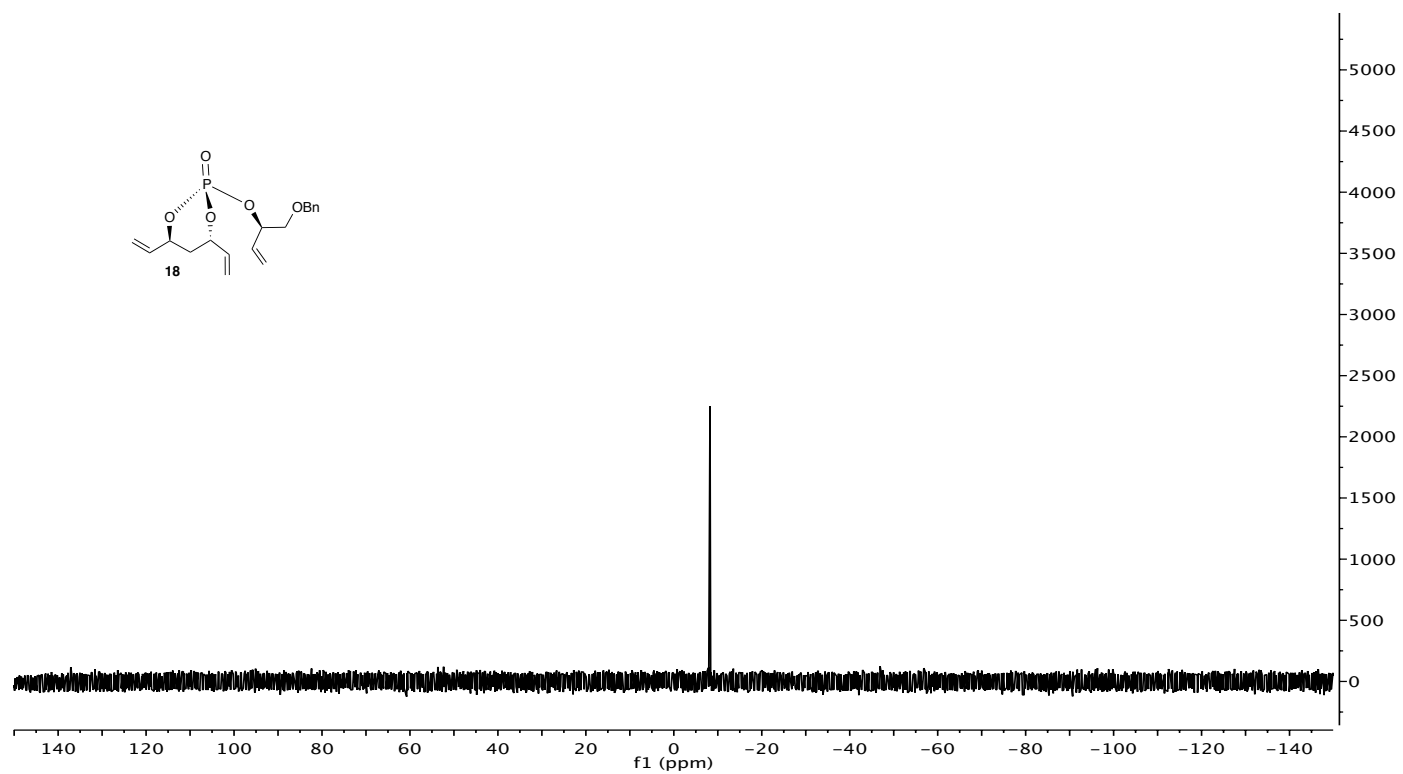

**(1*S*,3*R*,6*S*,8*S*)-3-((benzyloxy)methyl)-8-vinyl-2,9,10-trioxa-1-phosphabicyclo[4.3.1]dec-4-ene 1-oxide (*trans*-19):**

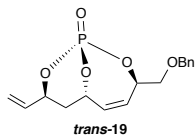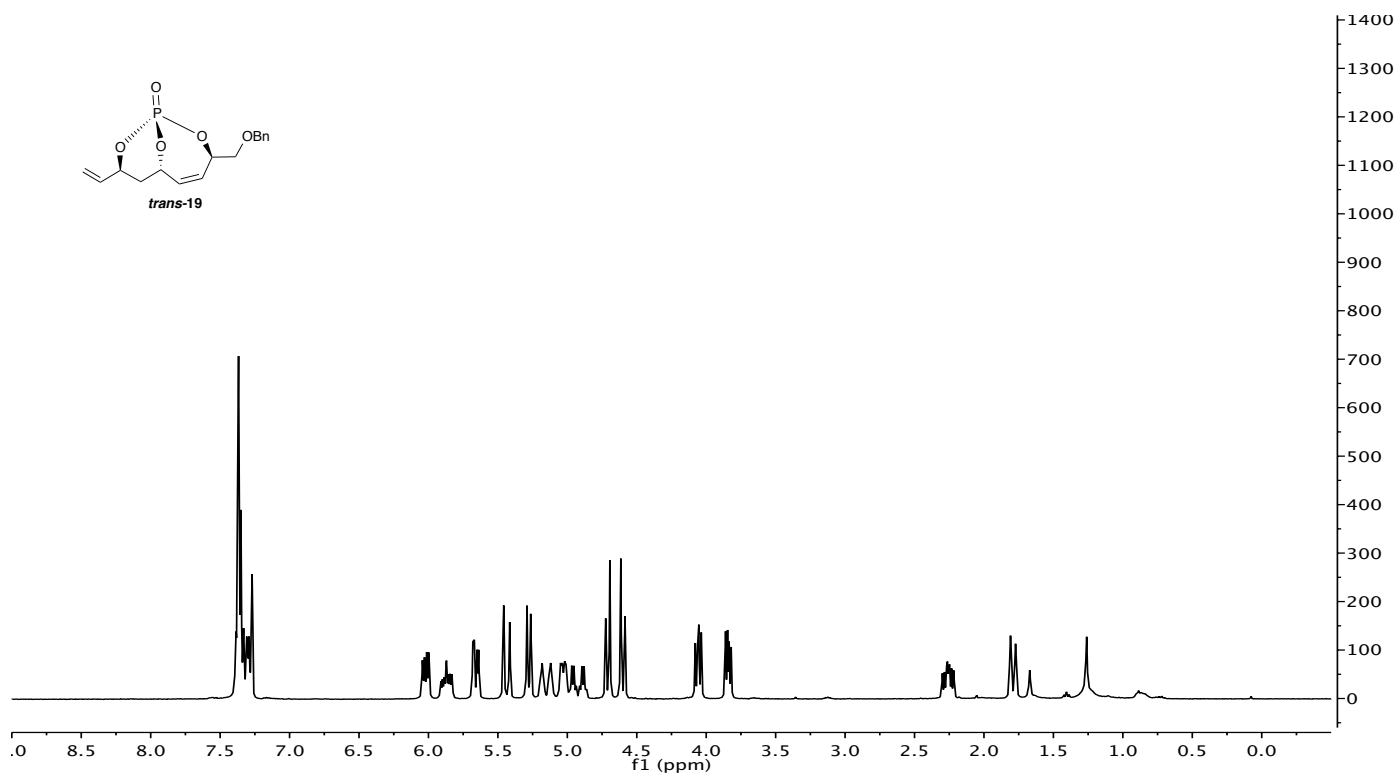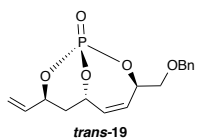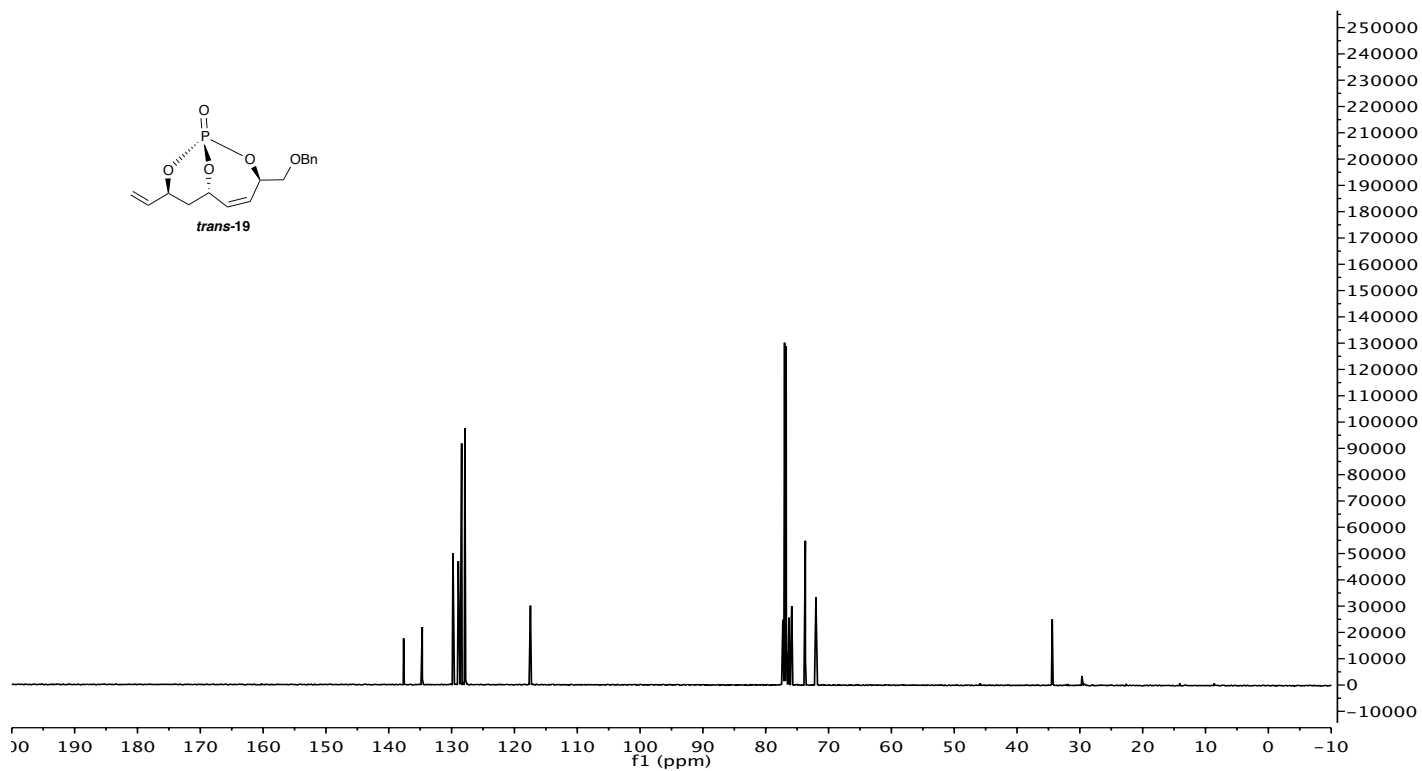

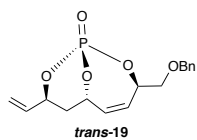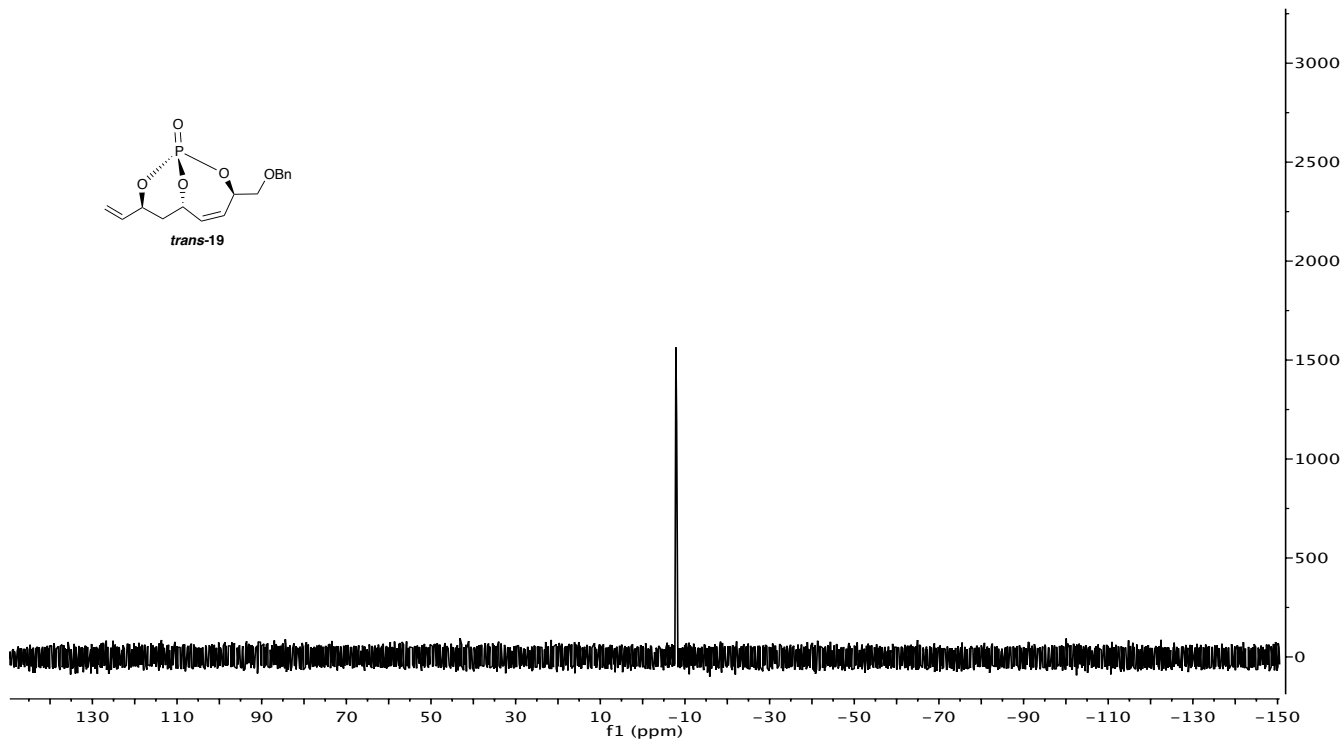

**(4R,6R)-2-(((R)-1-(benzyloxy)but-3-en-2-yl)oxy)-4,6-divinyl-1,3,2-dioxaphosphinane 2-oxide (20):**

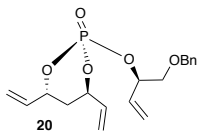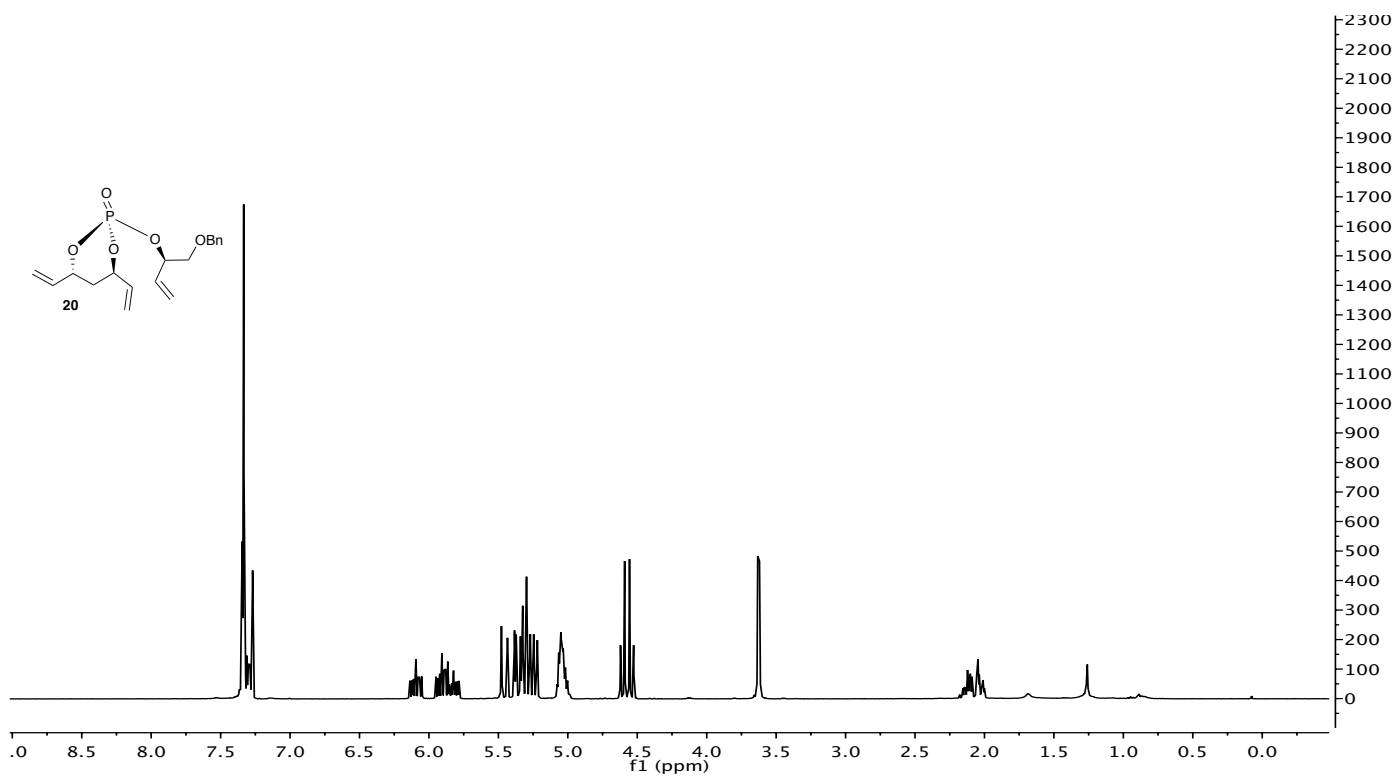

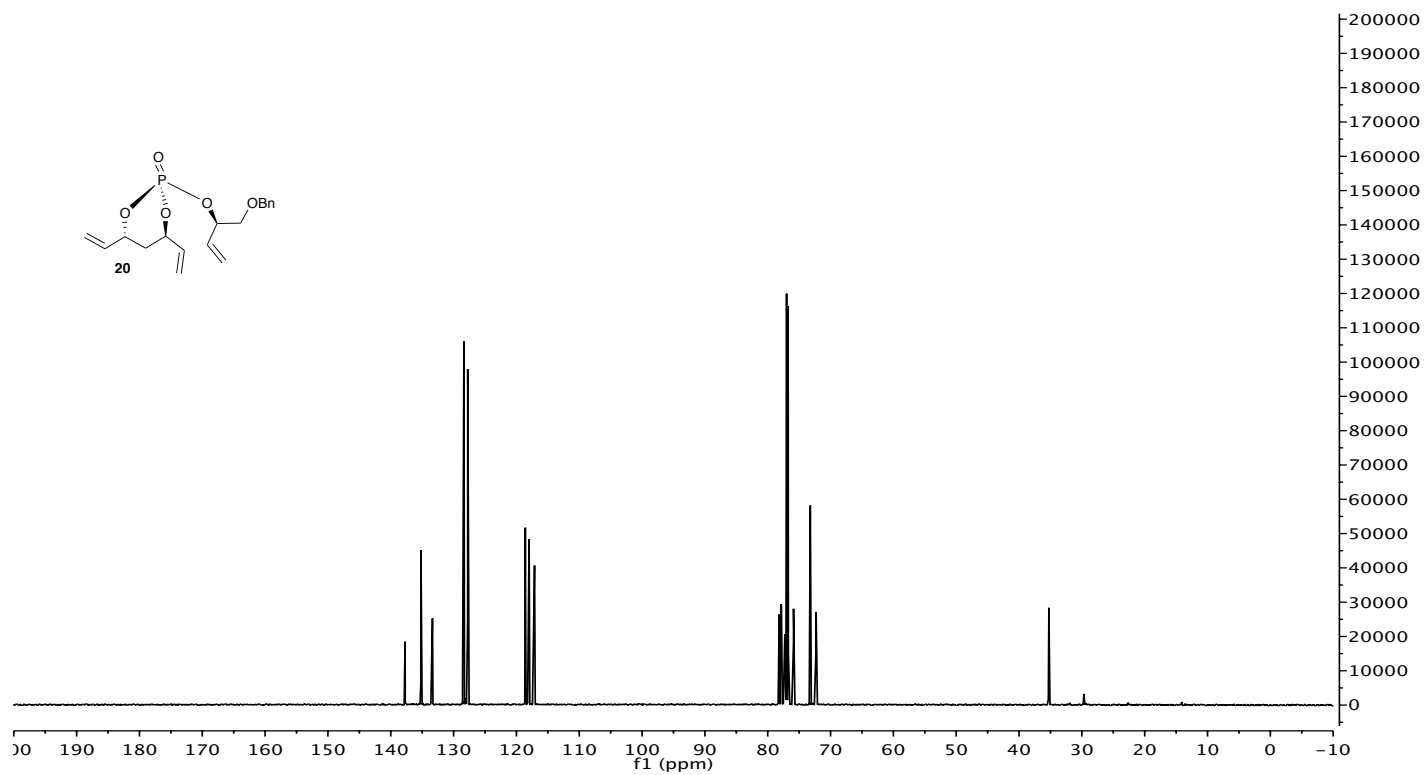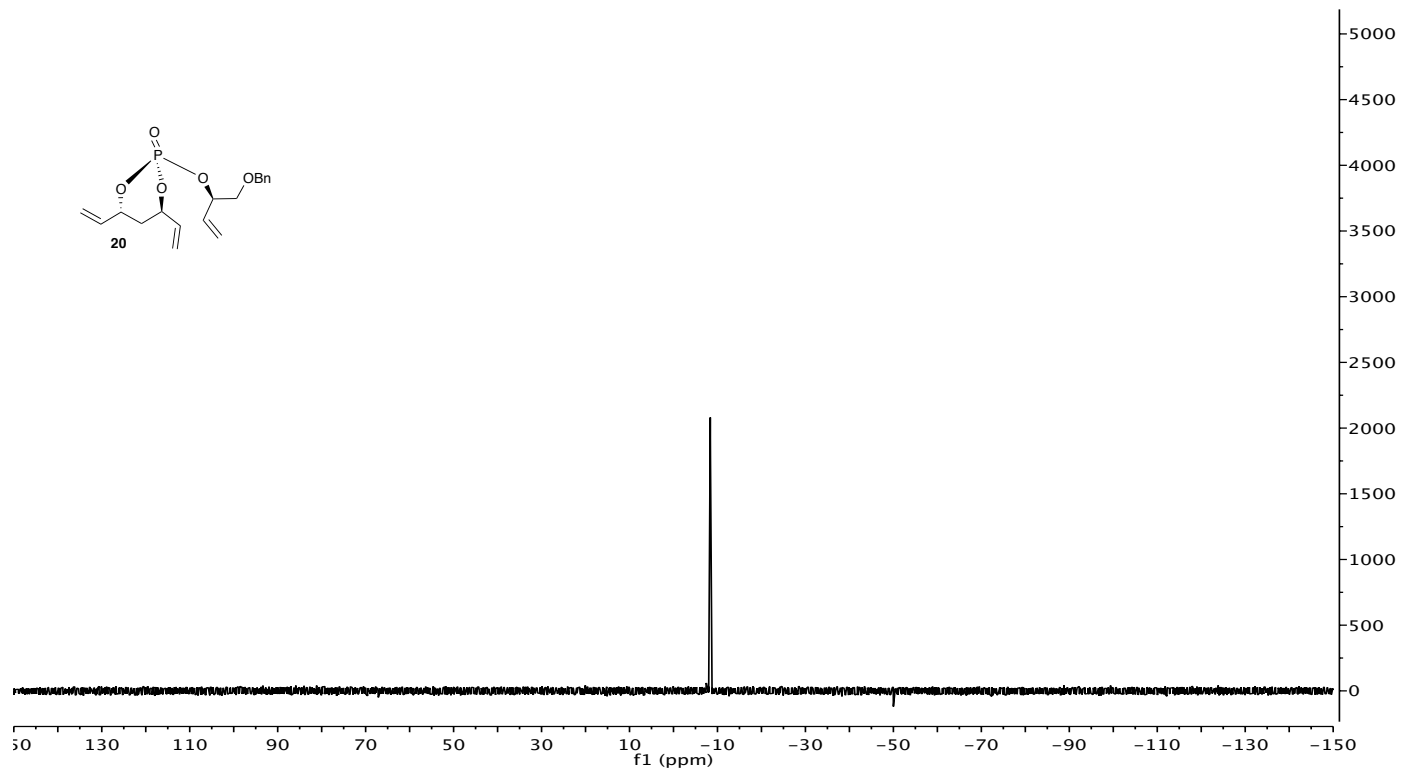

**(1*R*,3*R*,6*R*,8*R*)-3-((benzyloxy)methyl)-8-vinyl-2,9,10-trioxa-1-phosphabicyclo[4.3.1]dec-4-ene 1-oxide (*cis*-21):**

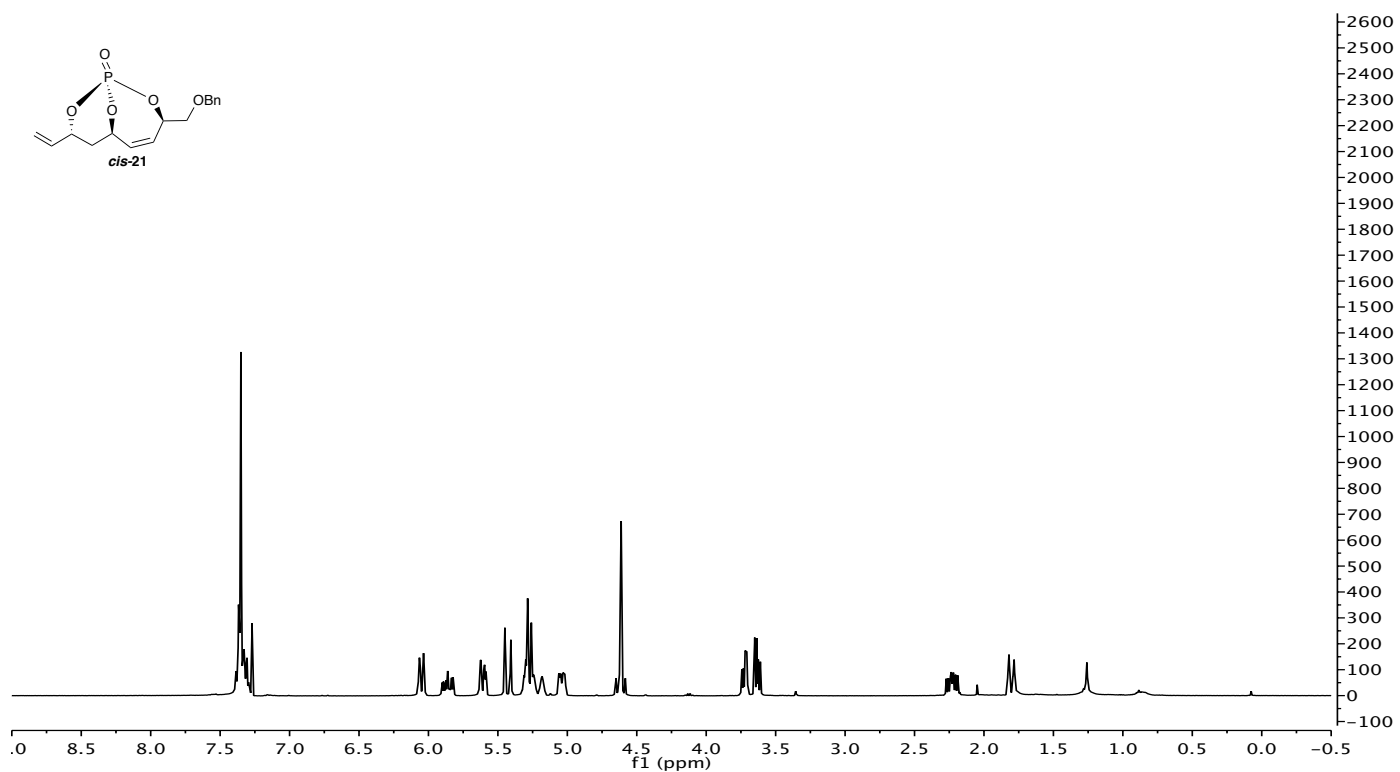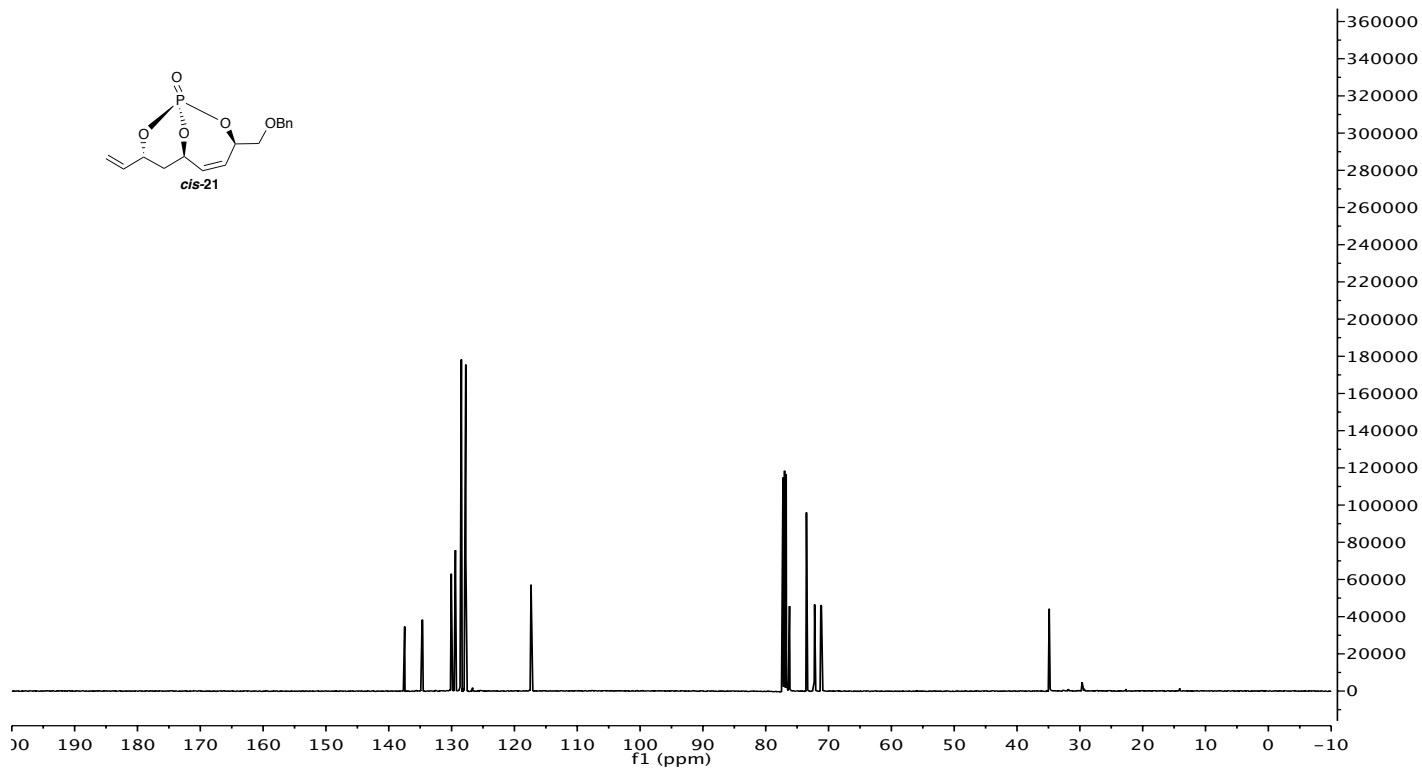

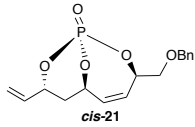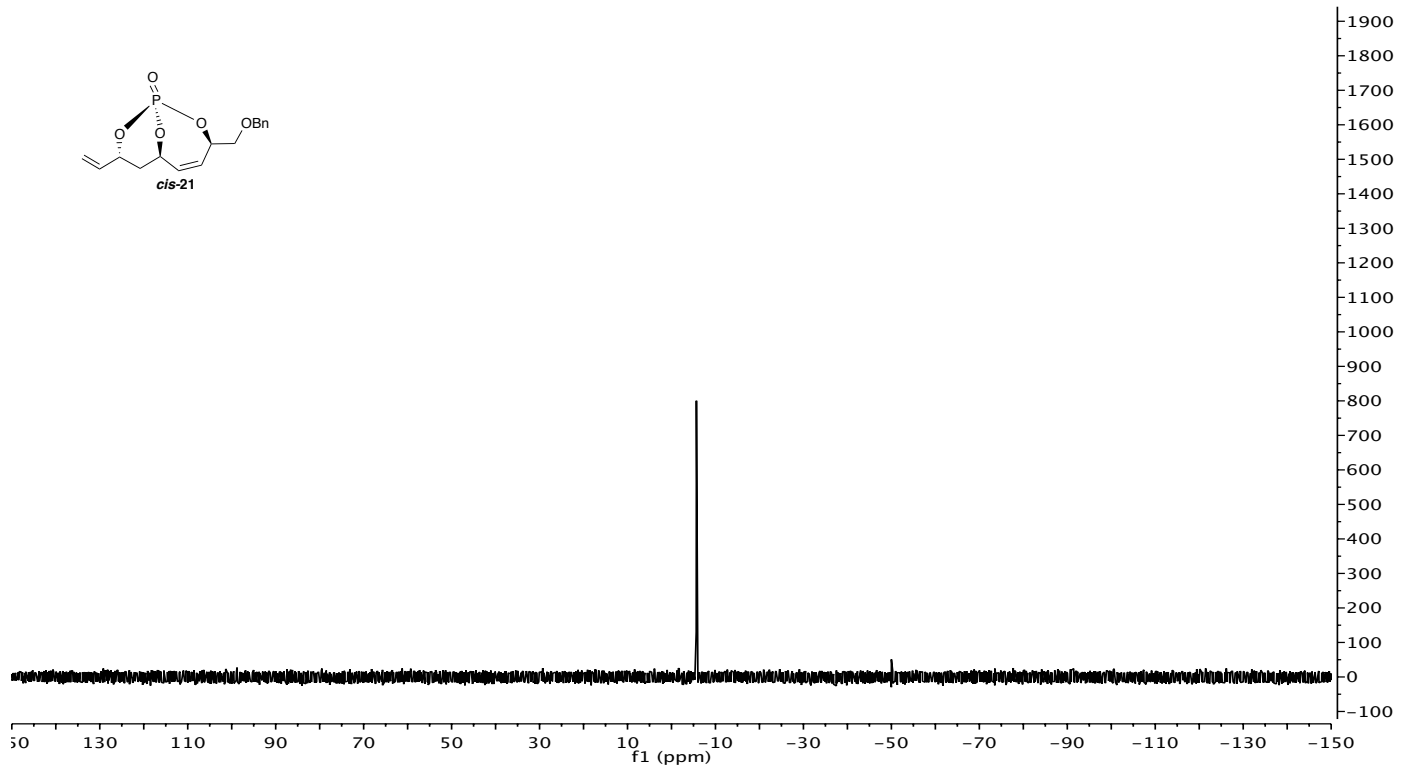

**(4*S*,6*S*)-2-((2,4-dimethylpenta-1,4-dien-3-yl)oxy)-4,6-divinyl-1,3,2-dioxaphosphinane 2-oxide (22):**

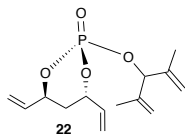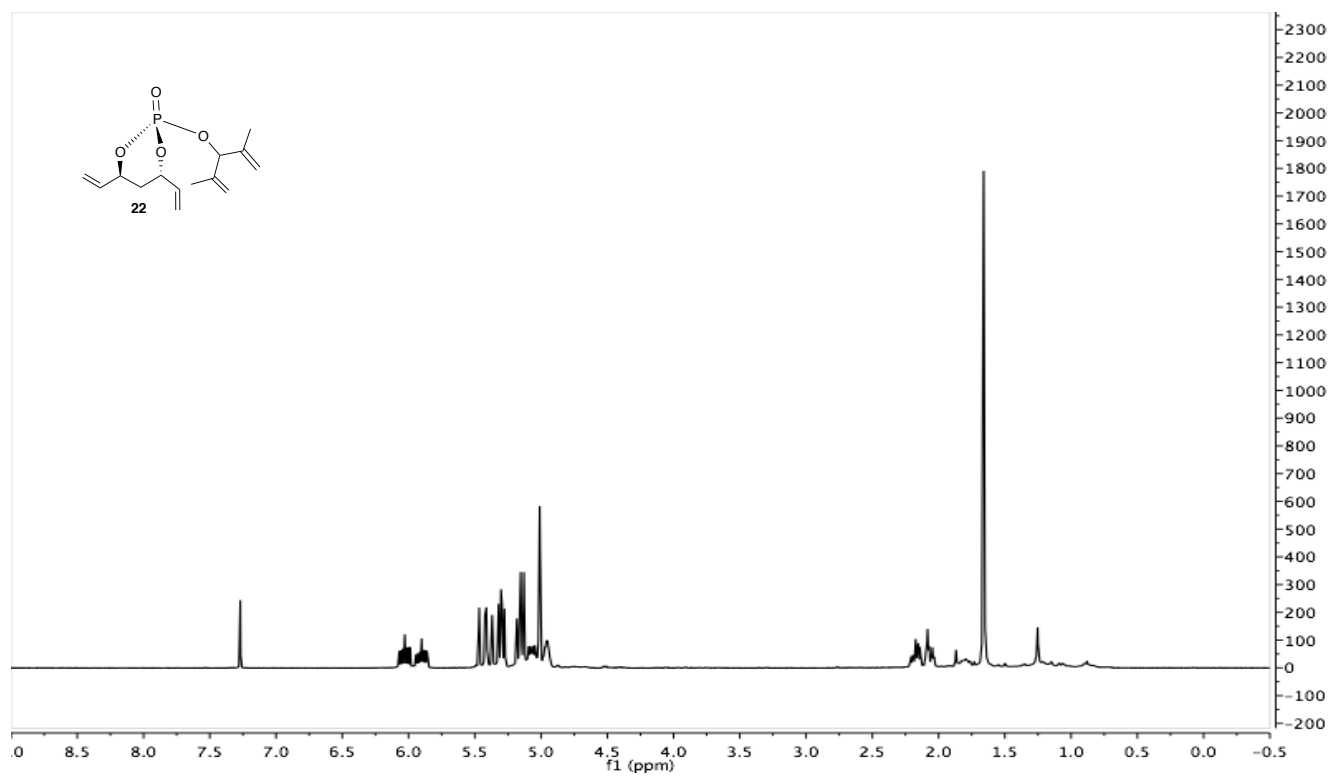

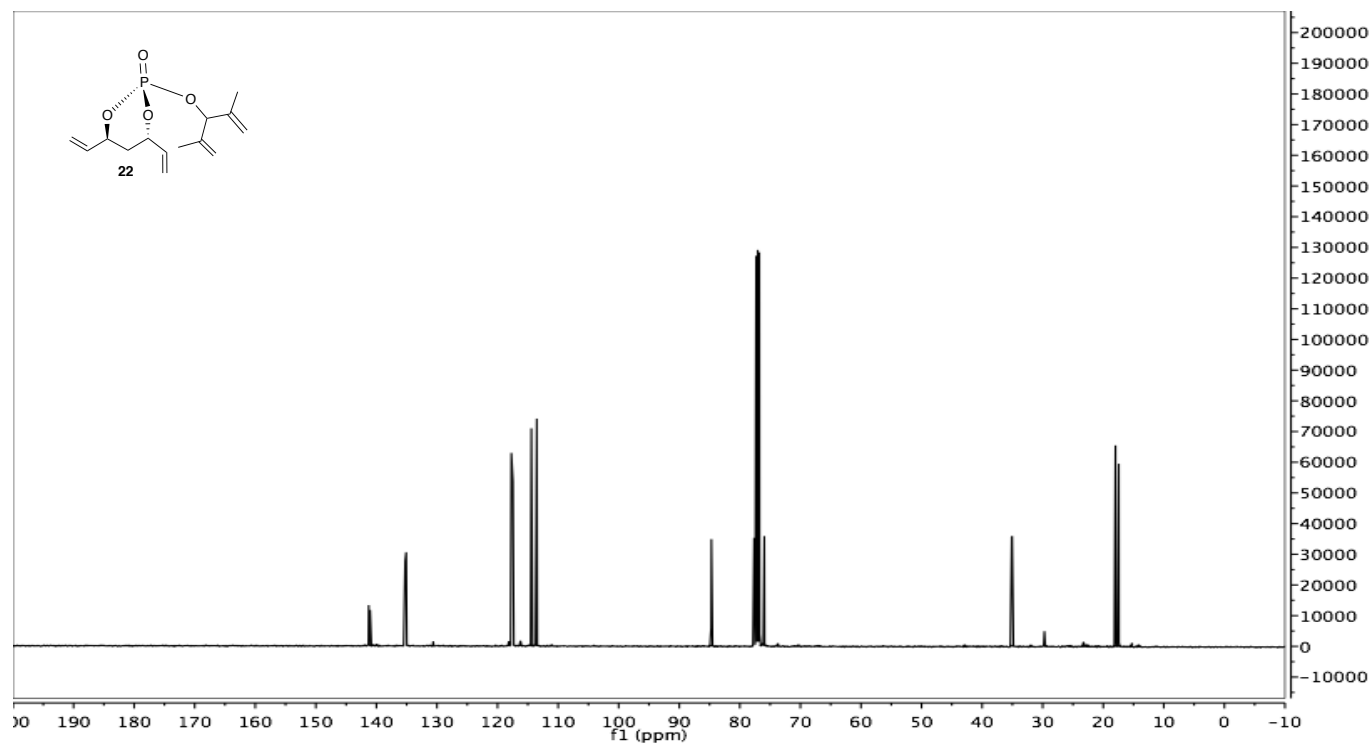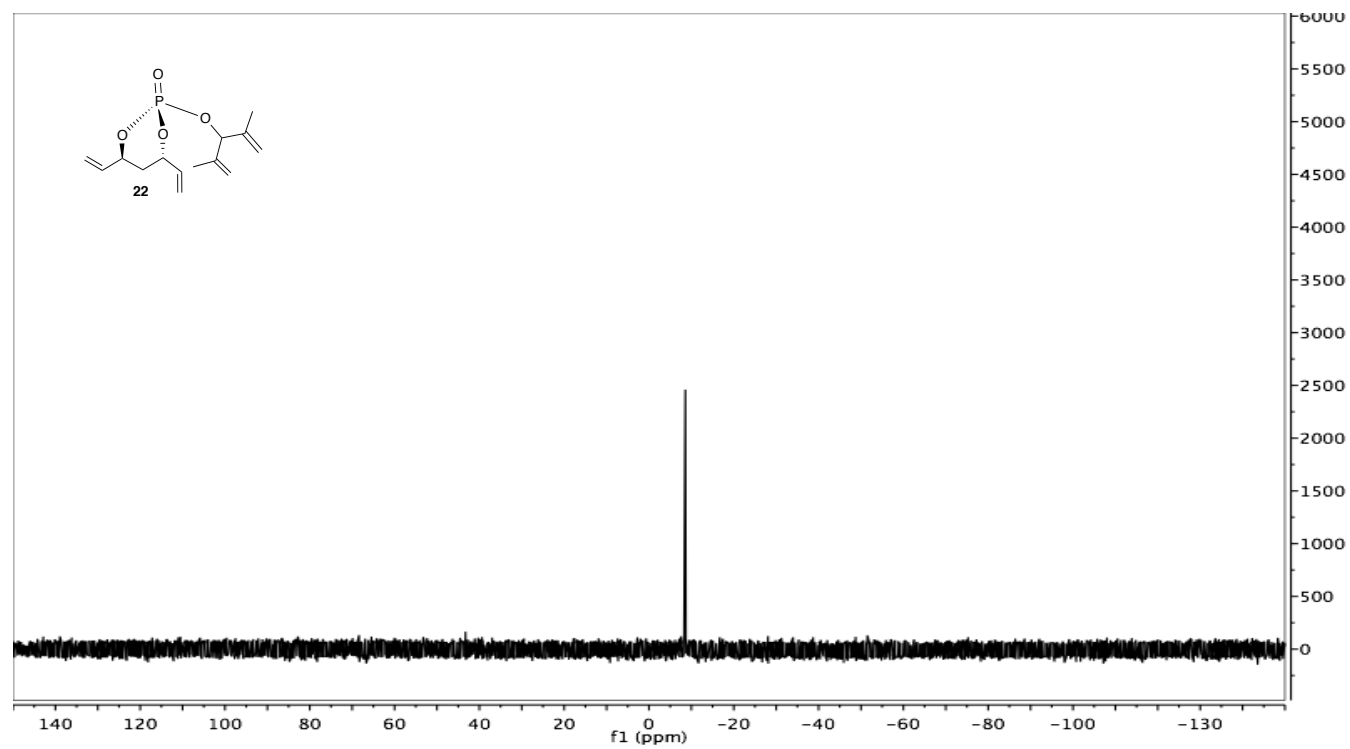

**(1*S*,3*R*,6*S*,8*S*)-4-methyl-3-(prop-1-en-2-yl)-8-vinyl-2,9,10-trioxa-1-phosphabicyclo[4.3.1]dec-4-ene 1-oxide (*cis*-23):**

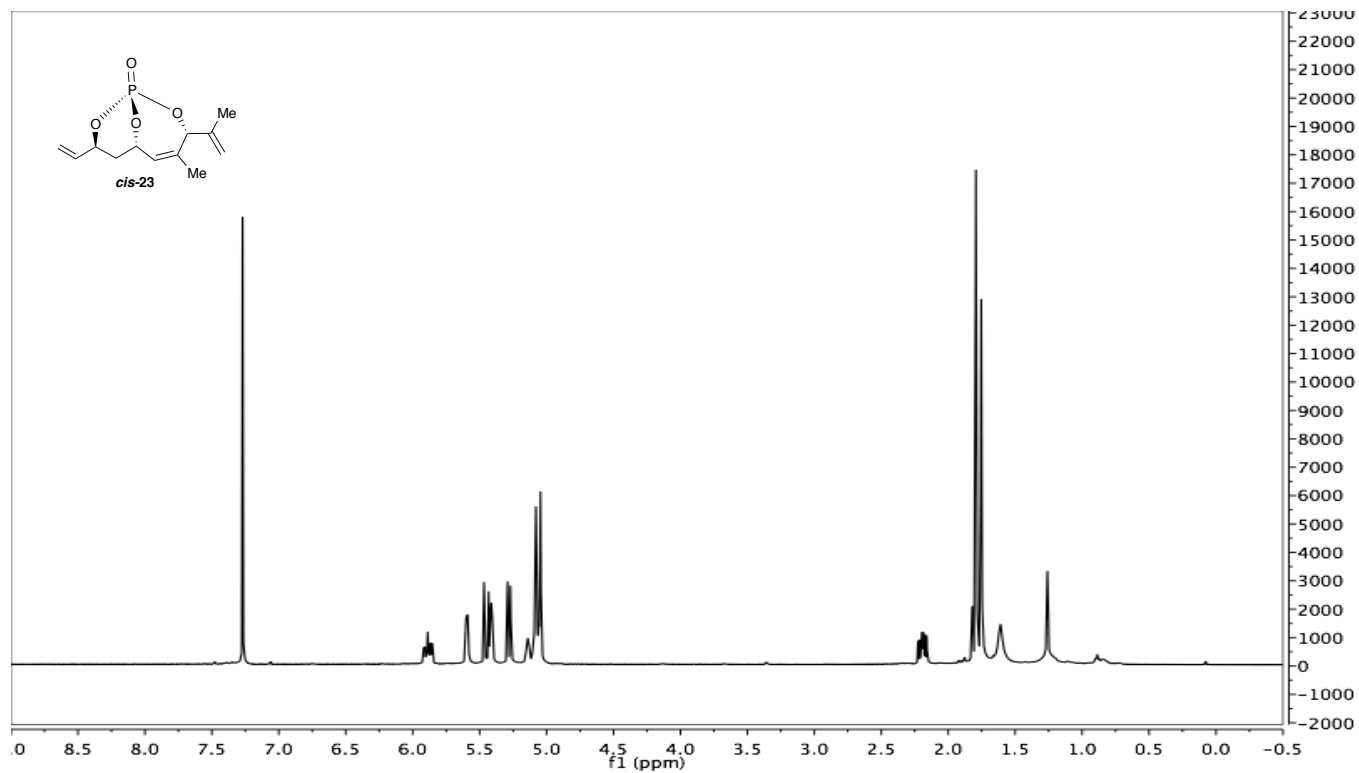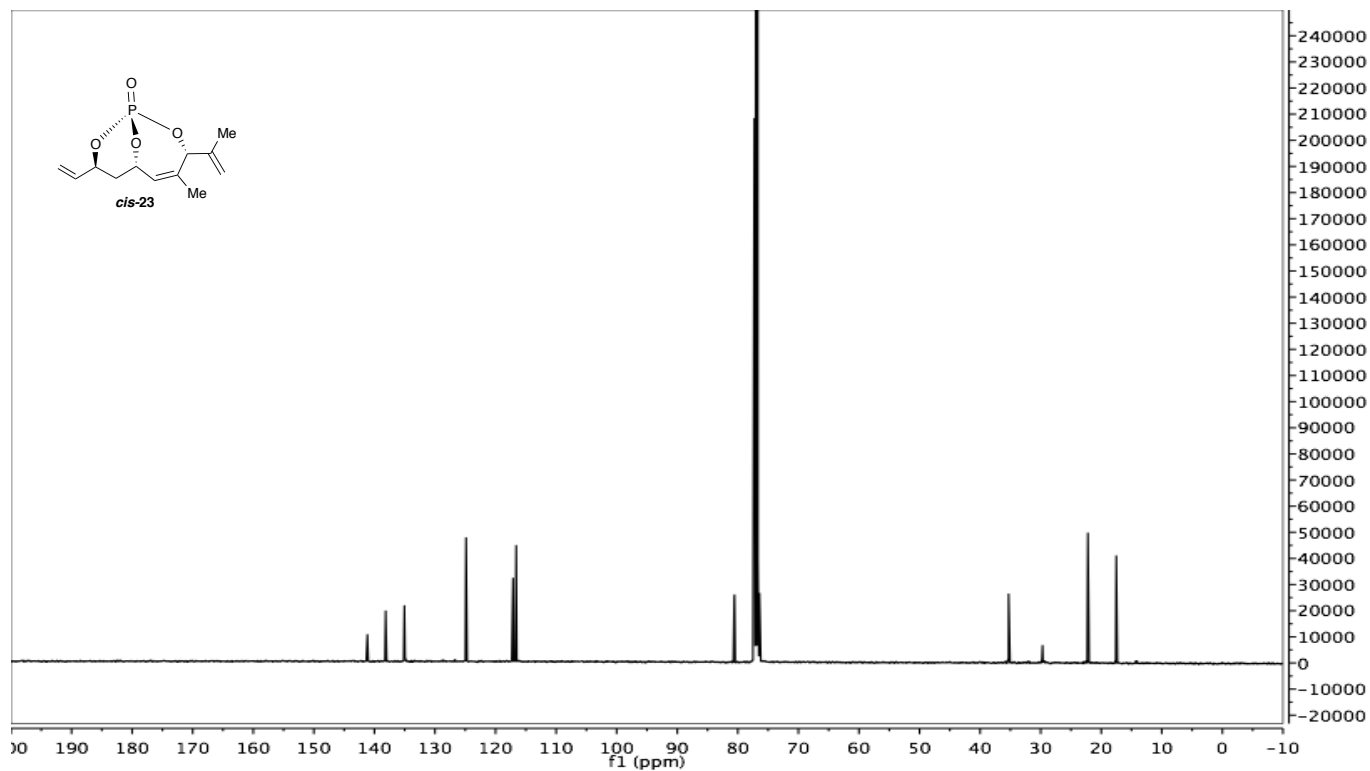



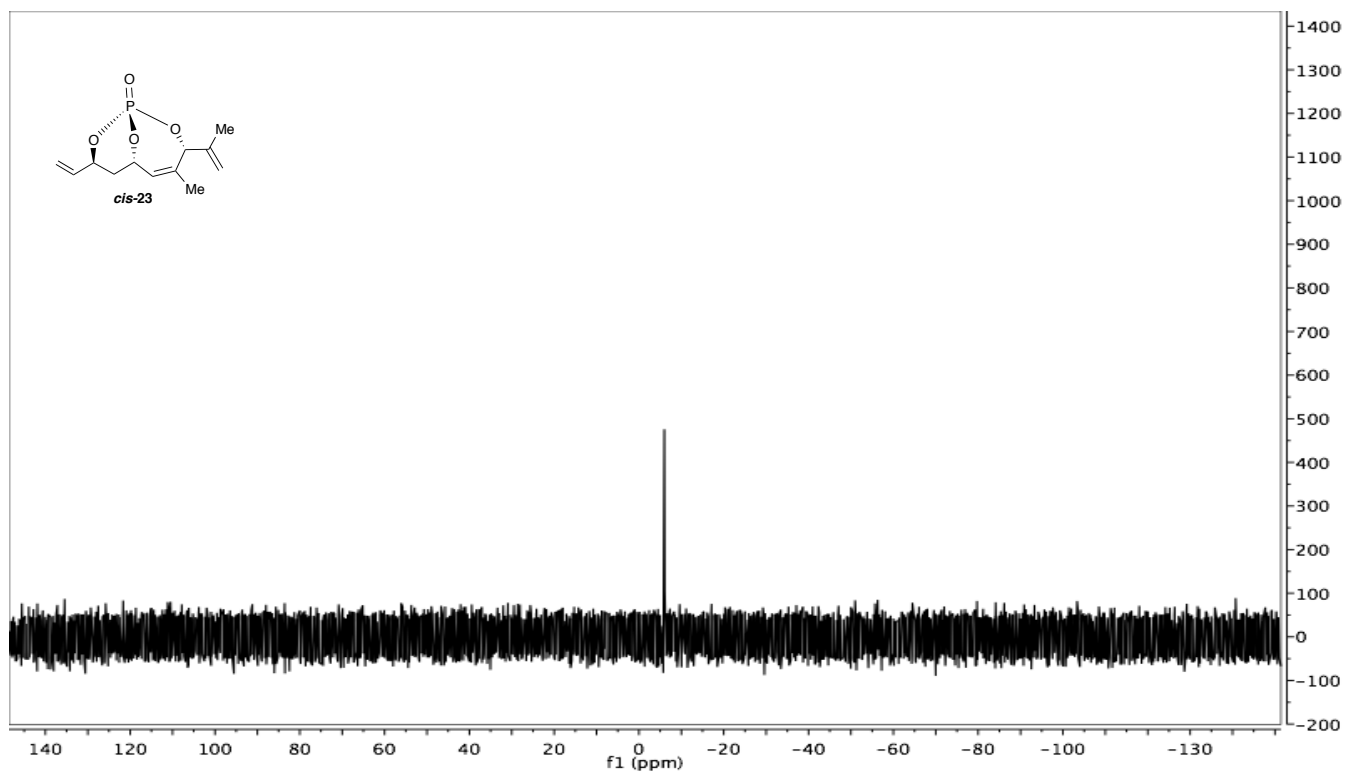

**(4*S*,6*S*)-2-(((*R*)-1-(benzyloxy)pent-4-en-2-yl)oxy)-4,6-divinyl-1,3,2-dioxaphosphinane 2-oxide (26):**

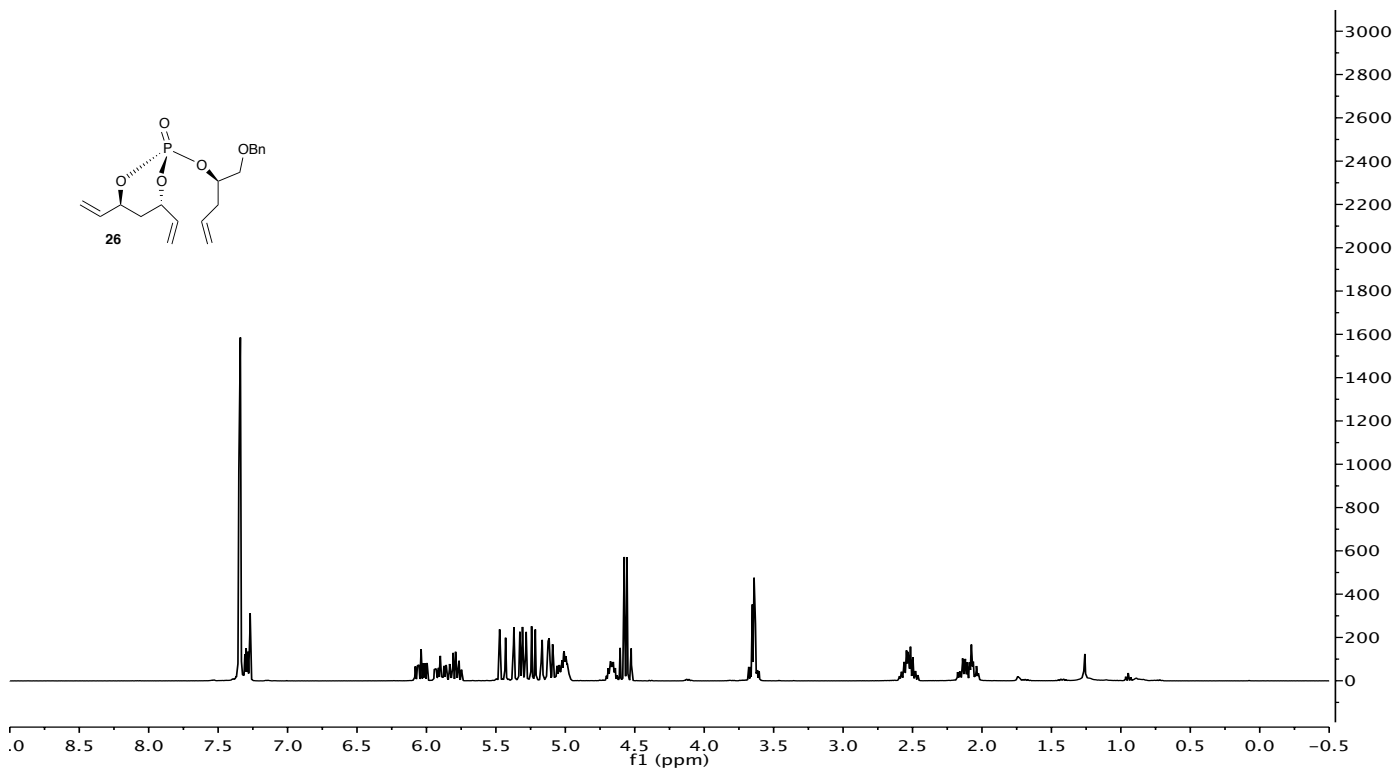

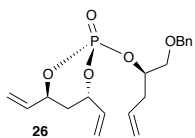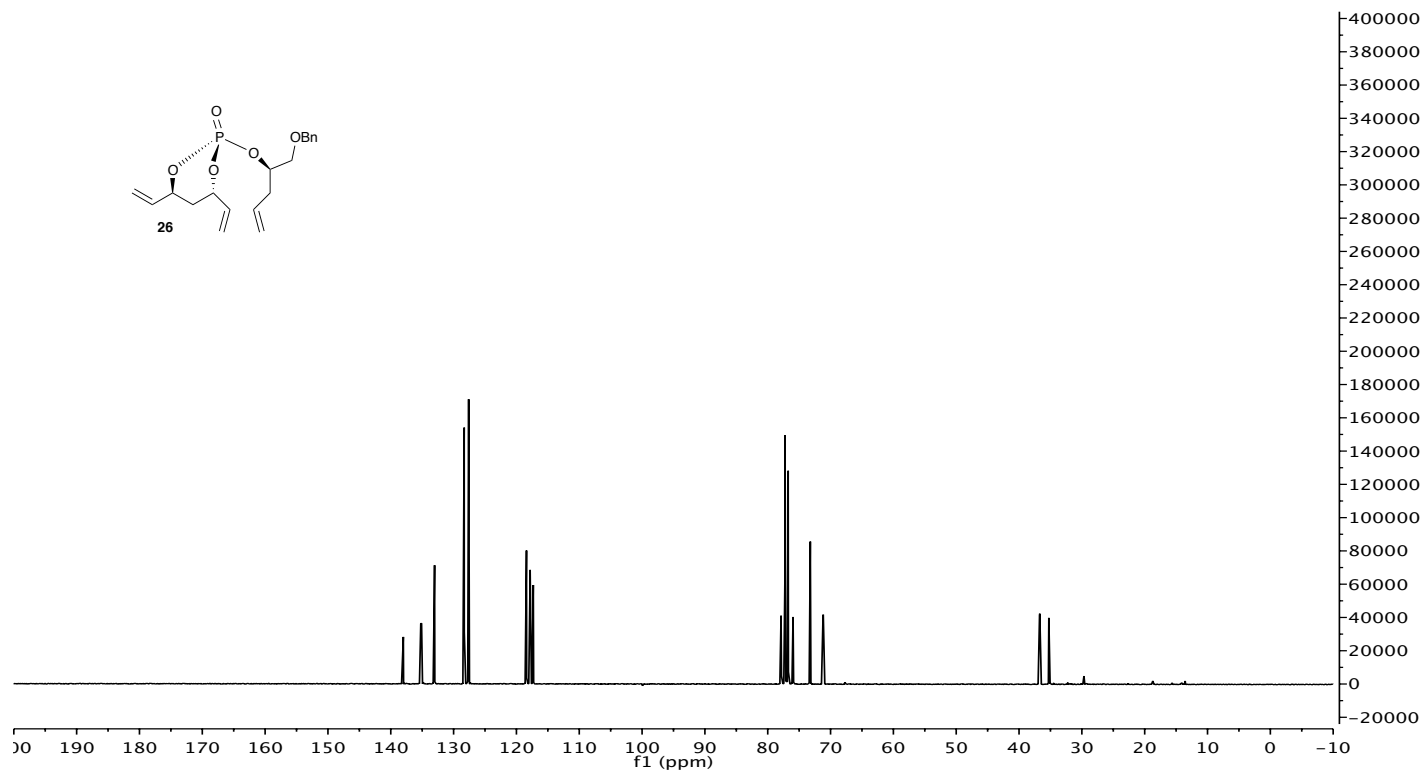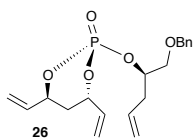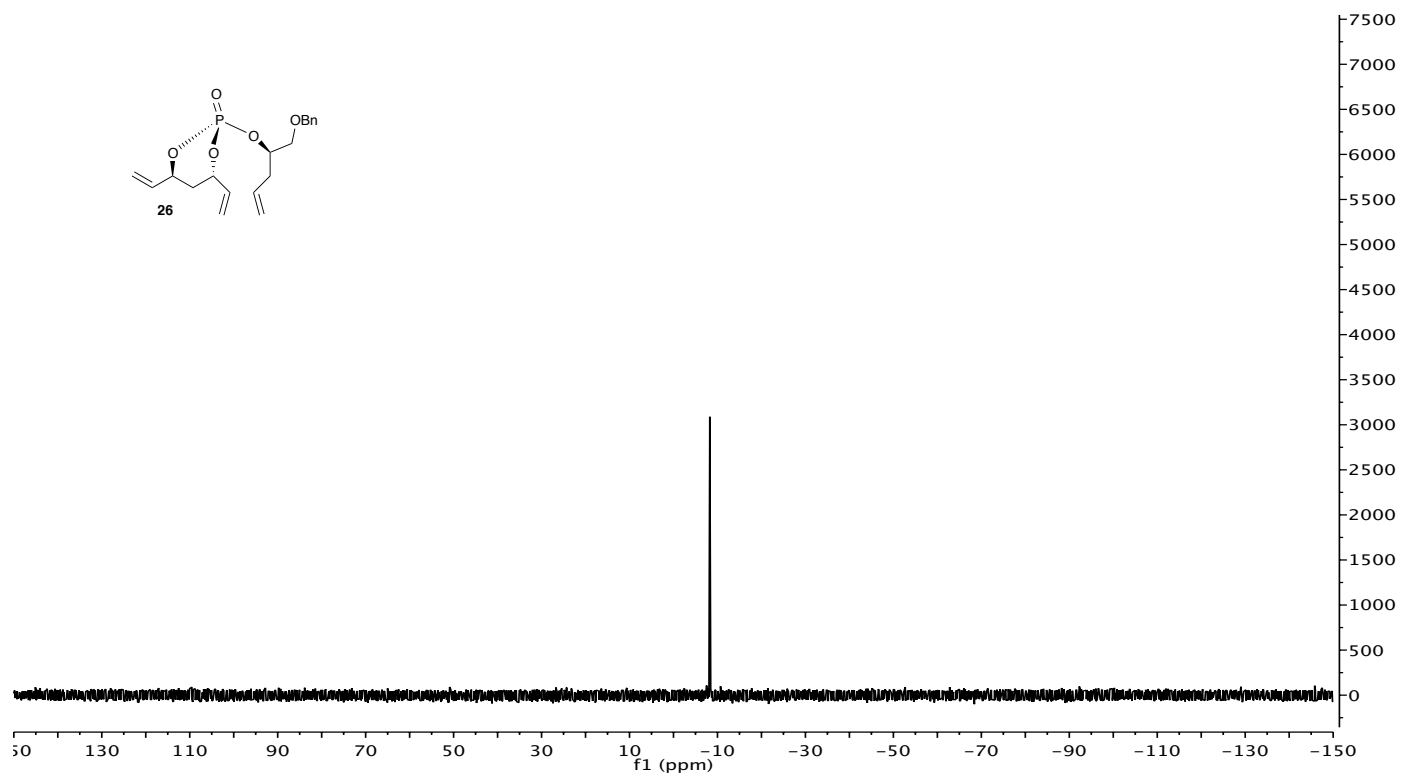

**(4*S*,6*S*)-2-(((*R*)-1-(benzyloxy)-4-methylpent-4-en-2-yl)oxy)-4,6-divinyl-1,3,2-dioxaphosphinane 2-oxide (27):**

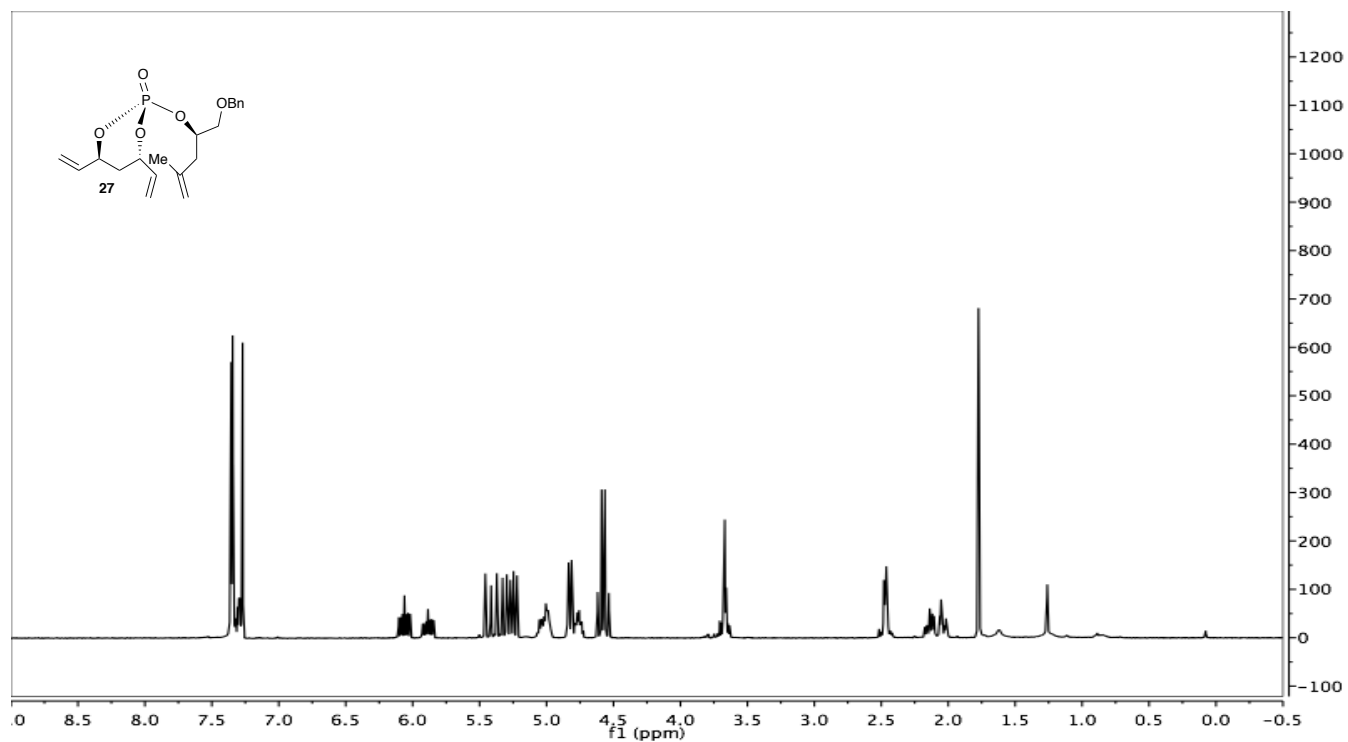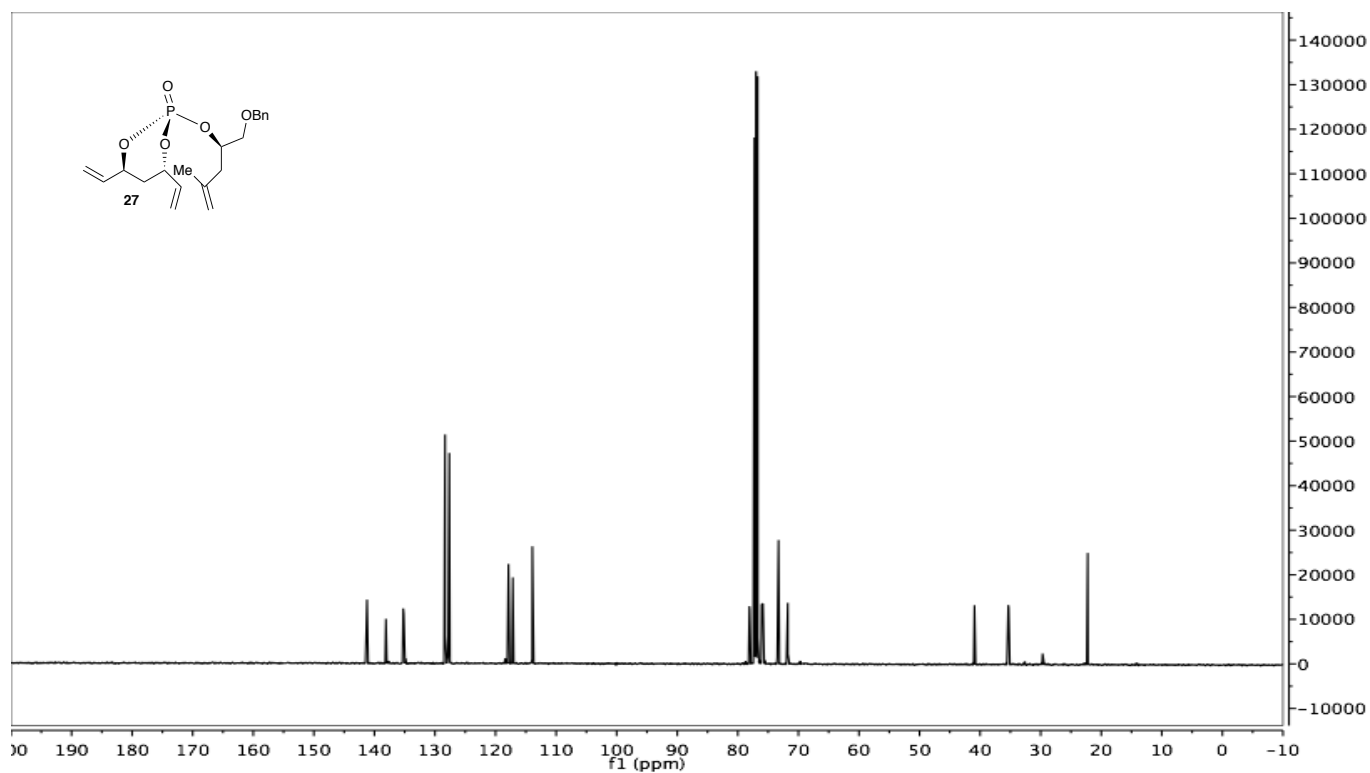

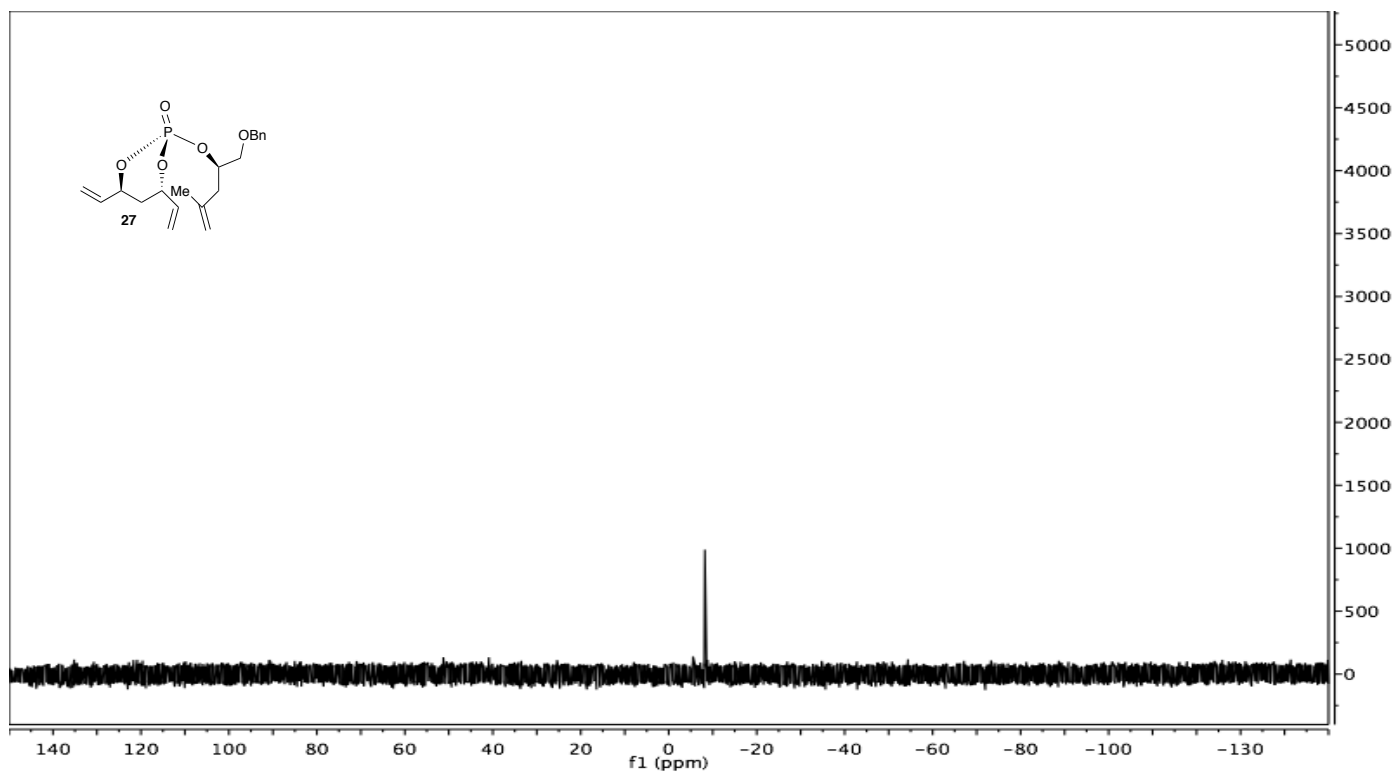

**(1*S*,3*R*,7*S*,9*S*,*Z*)-3-((benzyloxy)methyl)-9-vinyl-2,10,11-trioxa-1-phosphabicyclo[5.3.1]undec-5-ene 1-oxide (*trans*-28):**

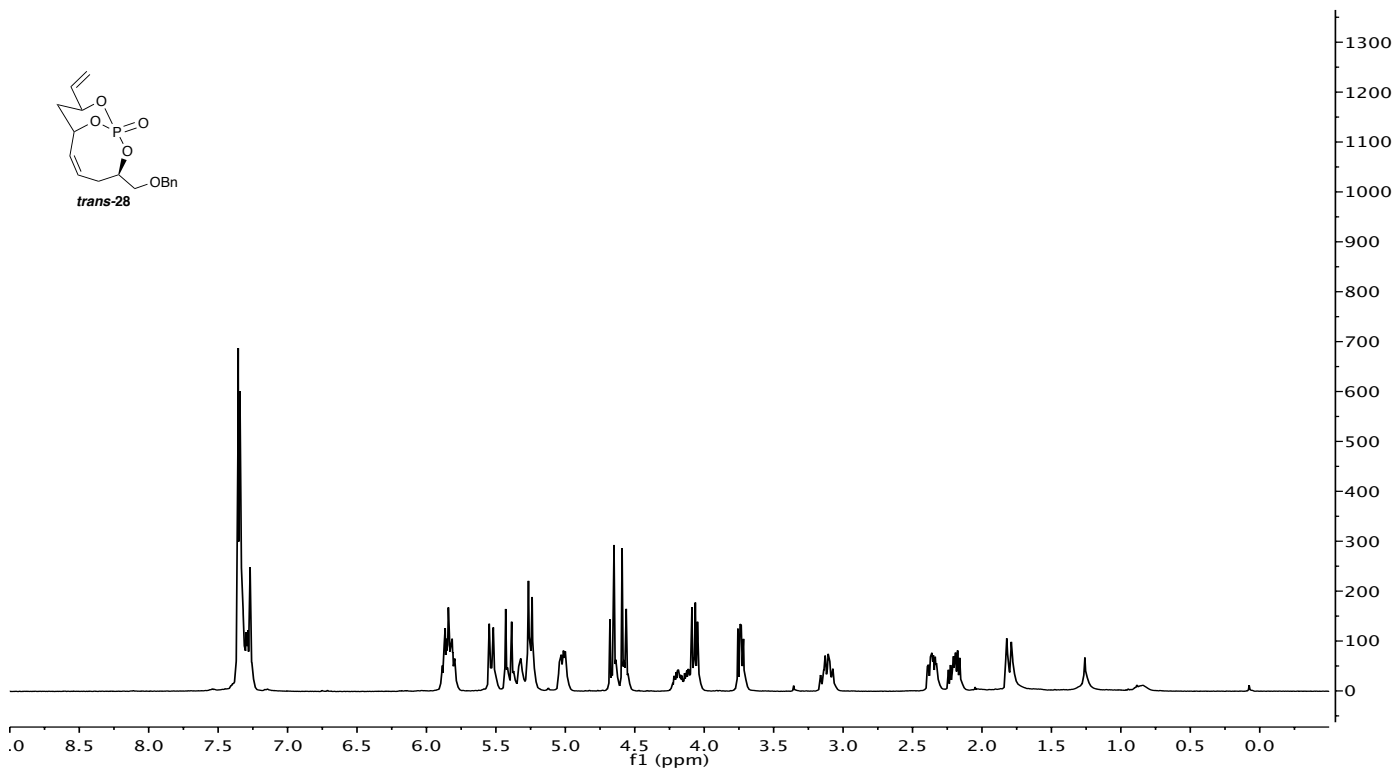

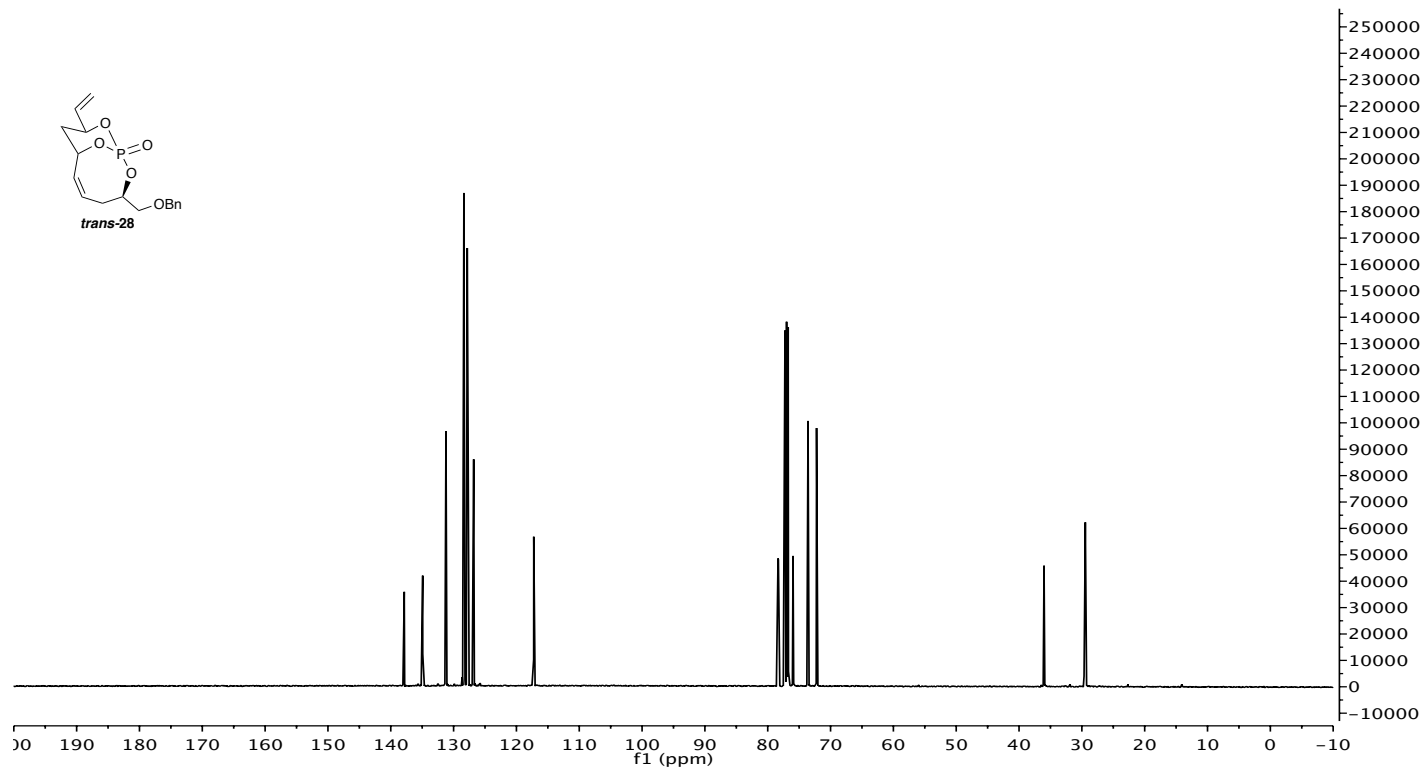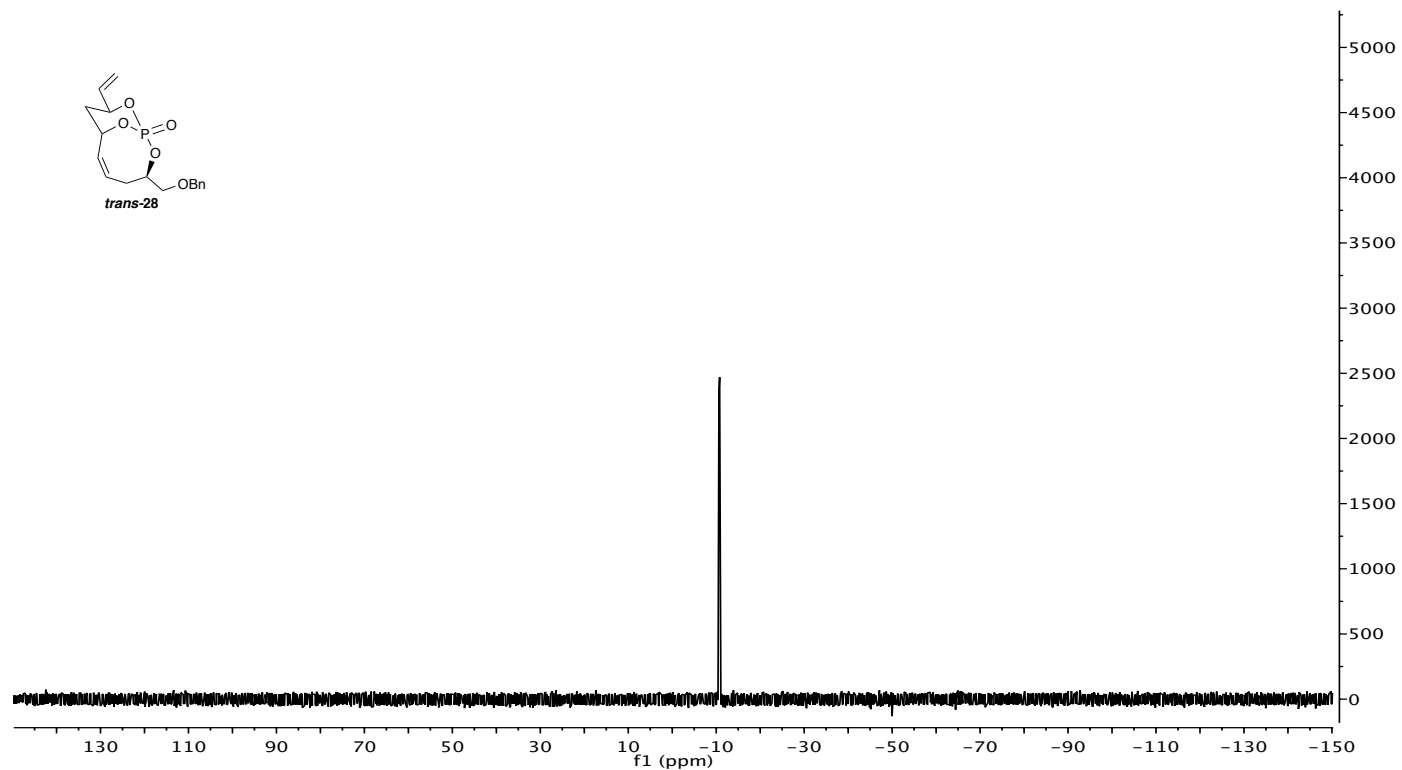

**(1*S*,3*R*,7*S*,9*S*,*Z*)-3-((benzyloxy)methyl)-5-methyl-9-vinyl-2,10,11-trioxa-1-phosphabicyclo[5.3.1]undec-5-ene 1-oxide (trans-29):**

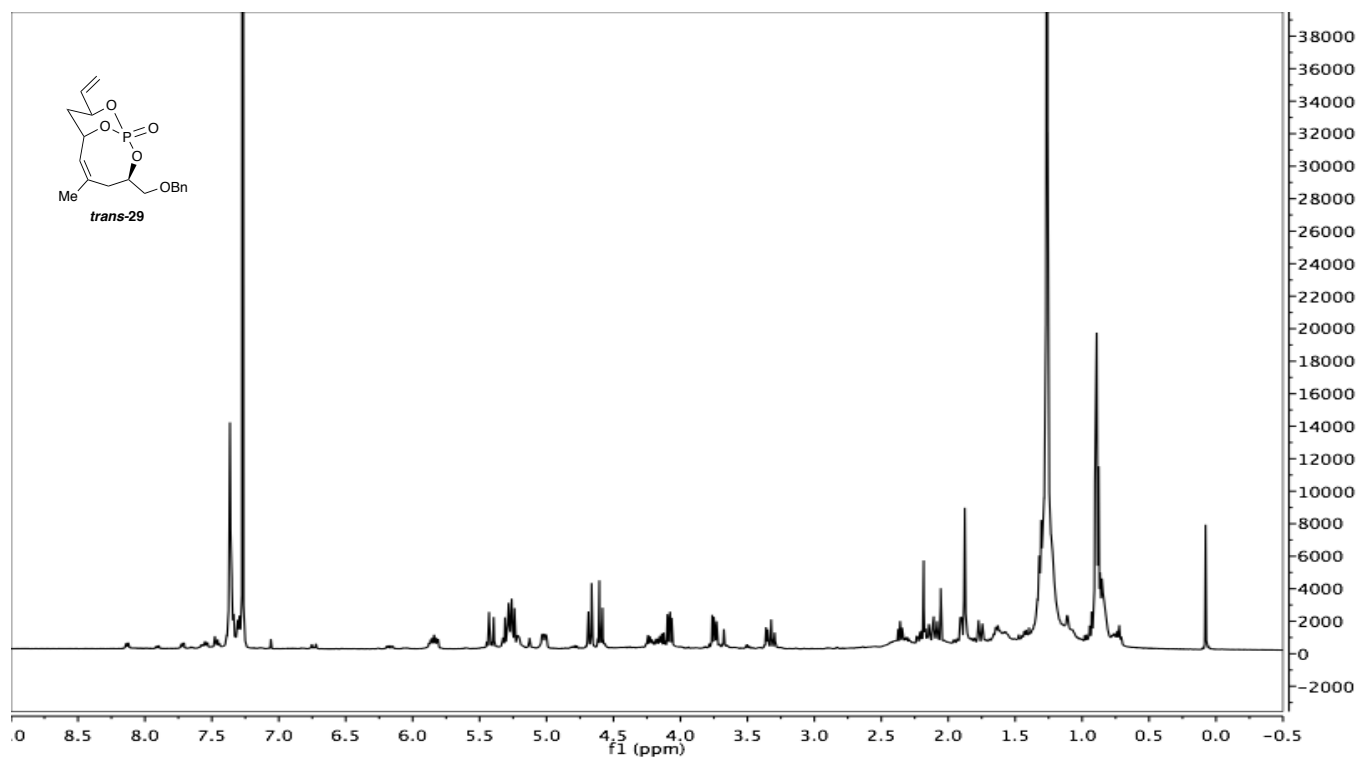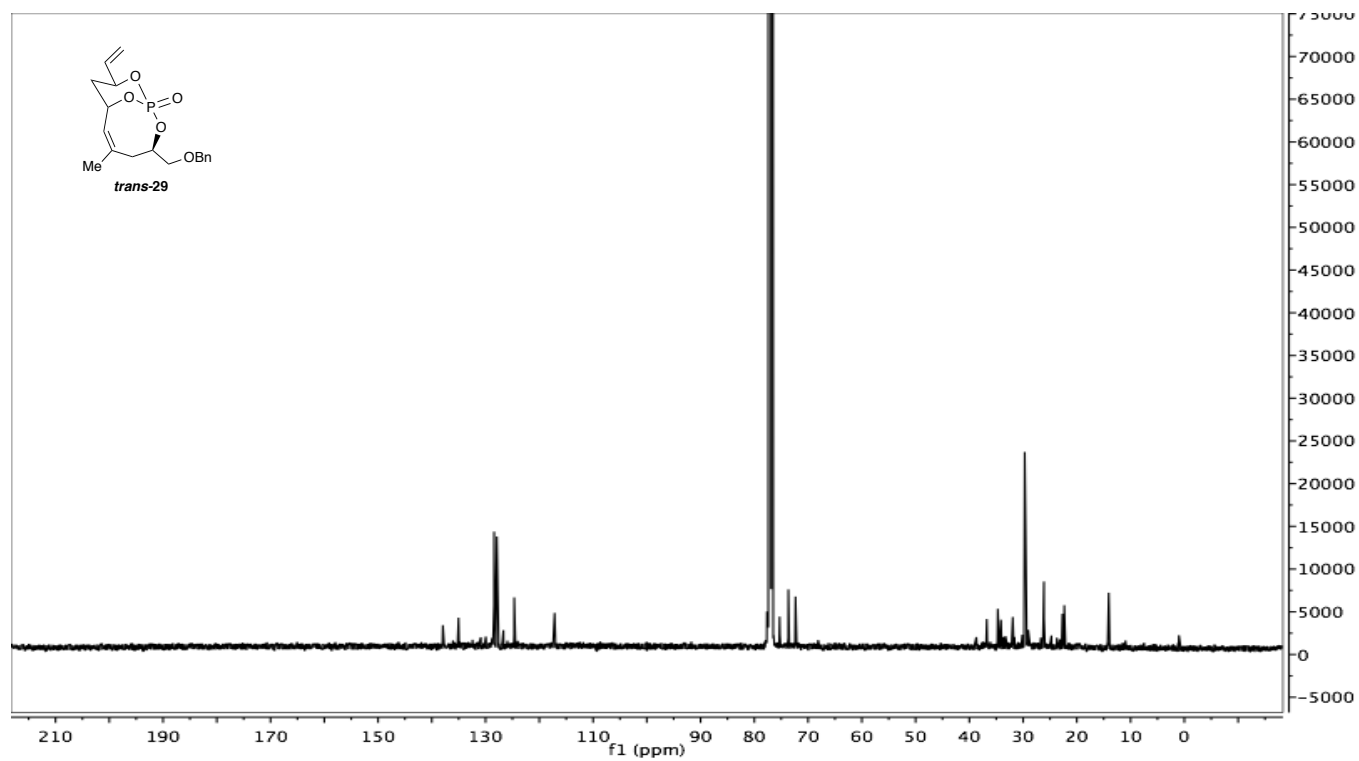

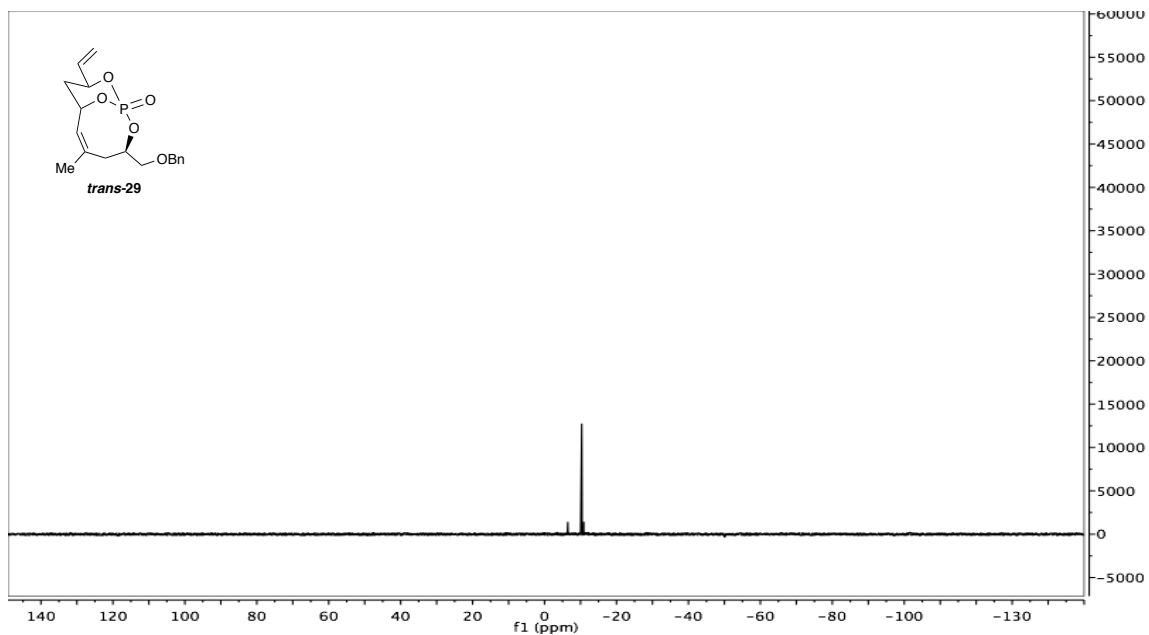

**(4*R*,6*R*)-2-(((*R*)-1-(benzyloxy)but-3-en-2-yl)oxy)-4,6-divinyl-1,3,2-dioxaphosphinane 2-oxide (30):**

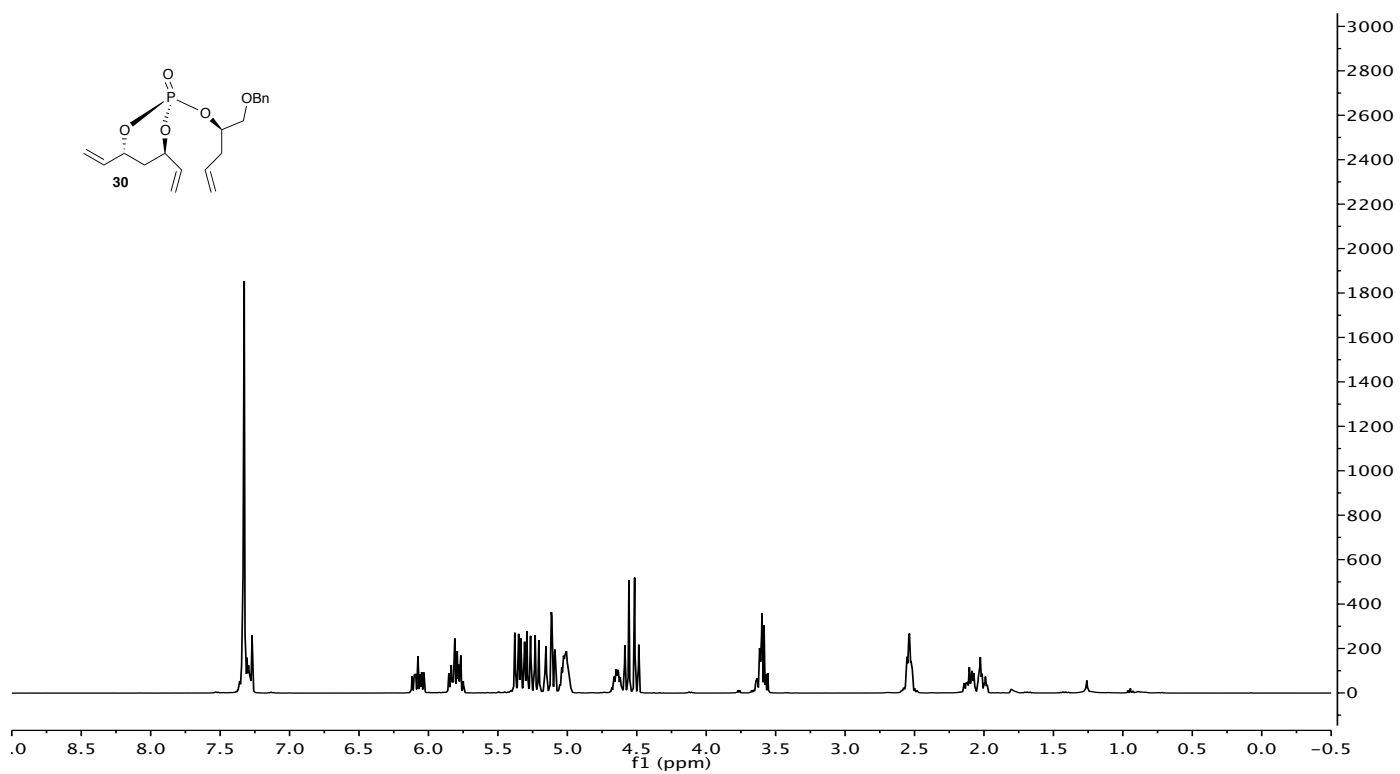

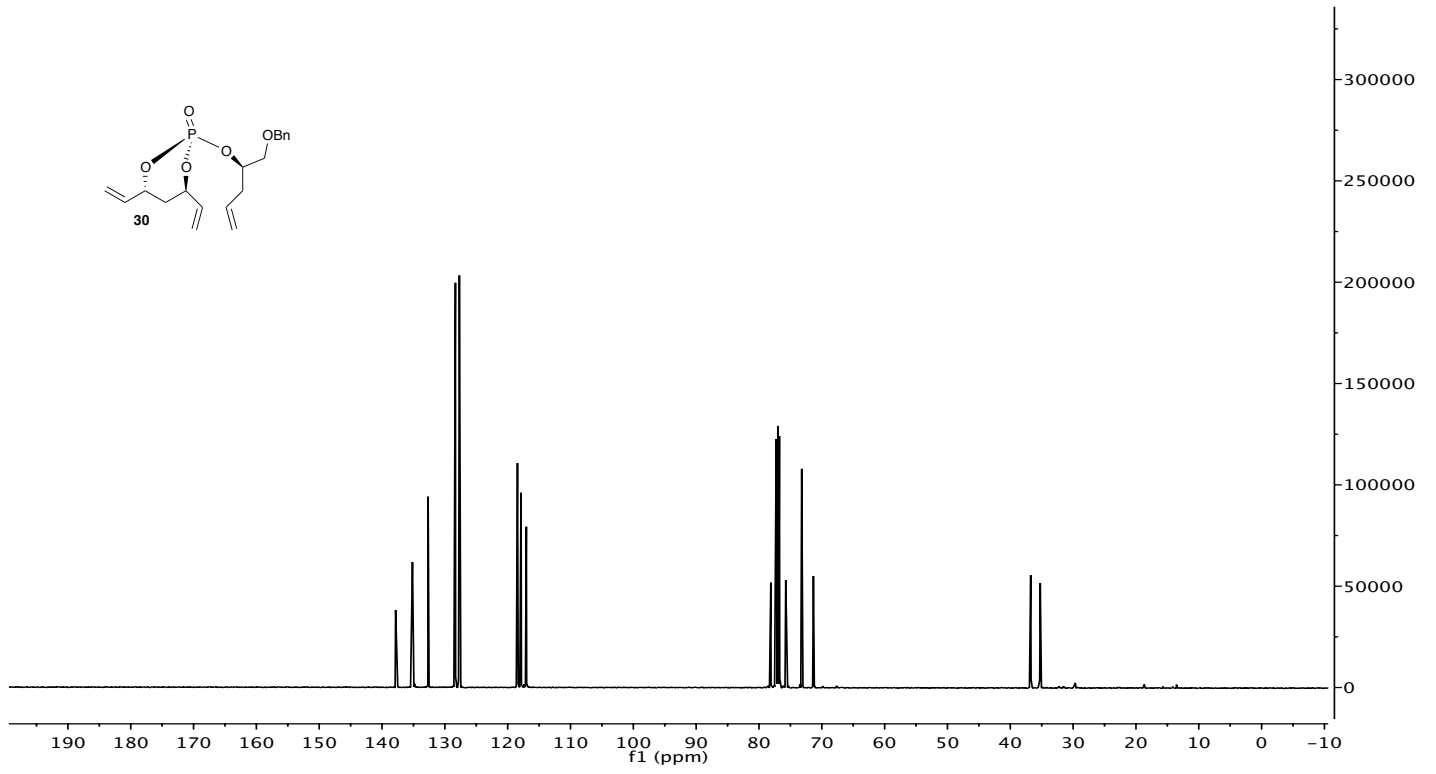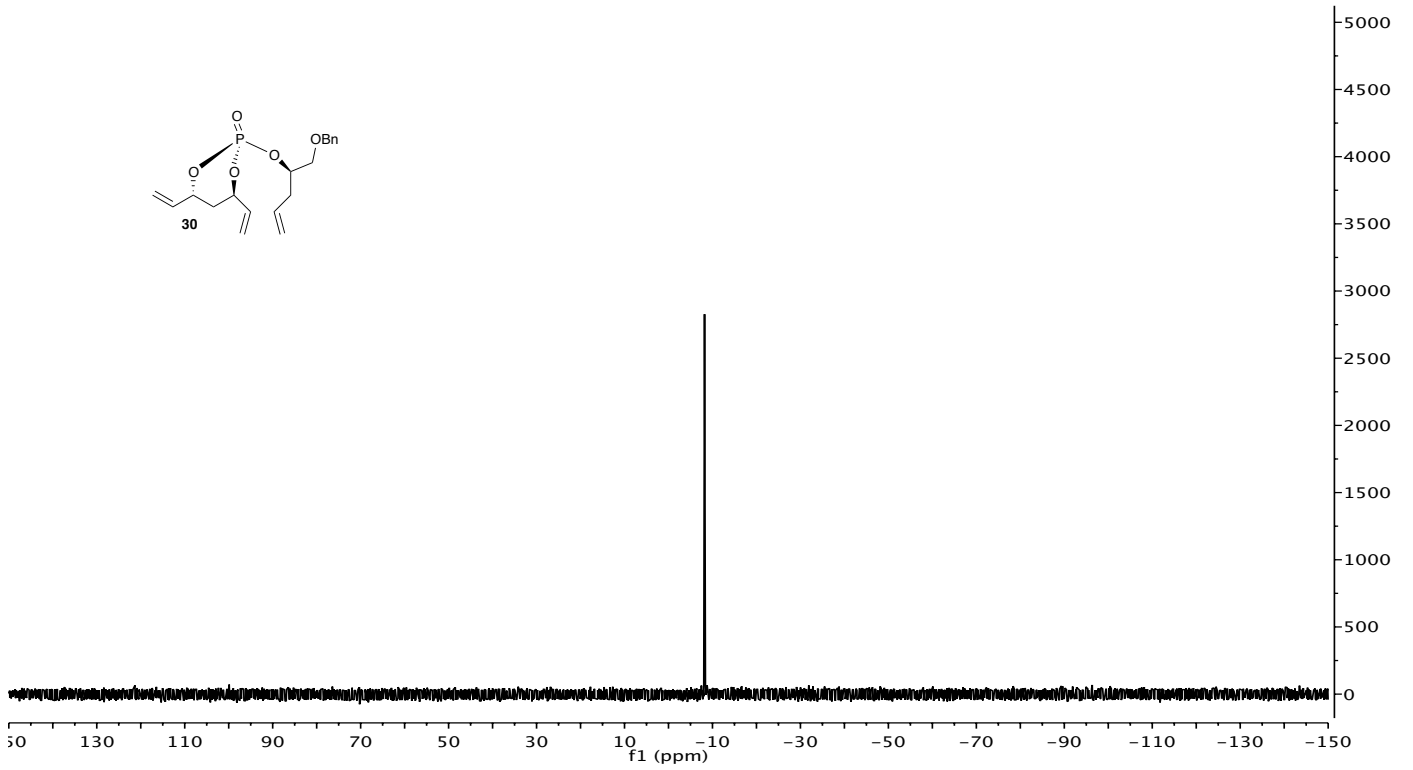



**(4*R*,6*R*)-2-(((*R*)-1-(benzyloxy)-4-methylpent-4-en-2-yl)oxy)-4,6-divinyl-1,3,2-dioxaphosphinane 2-oxide (31):**

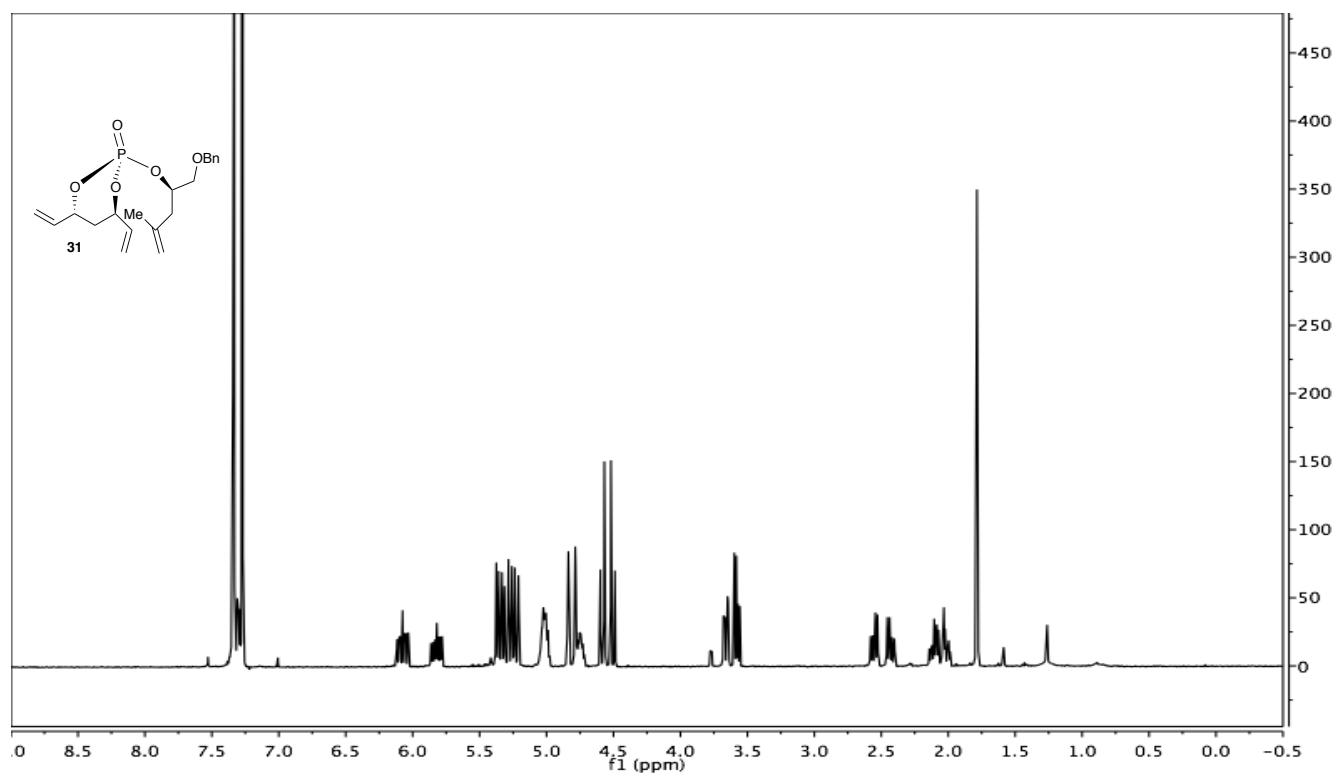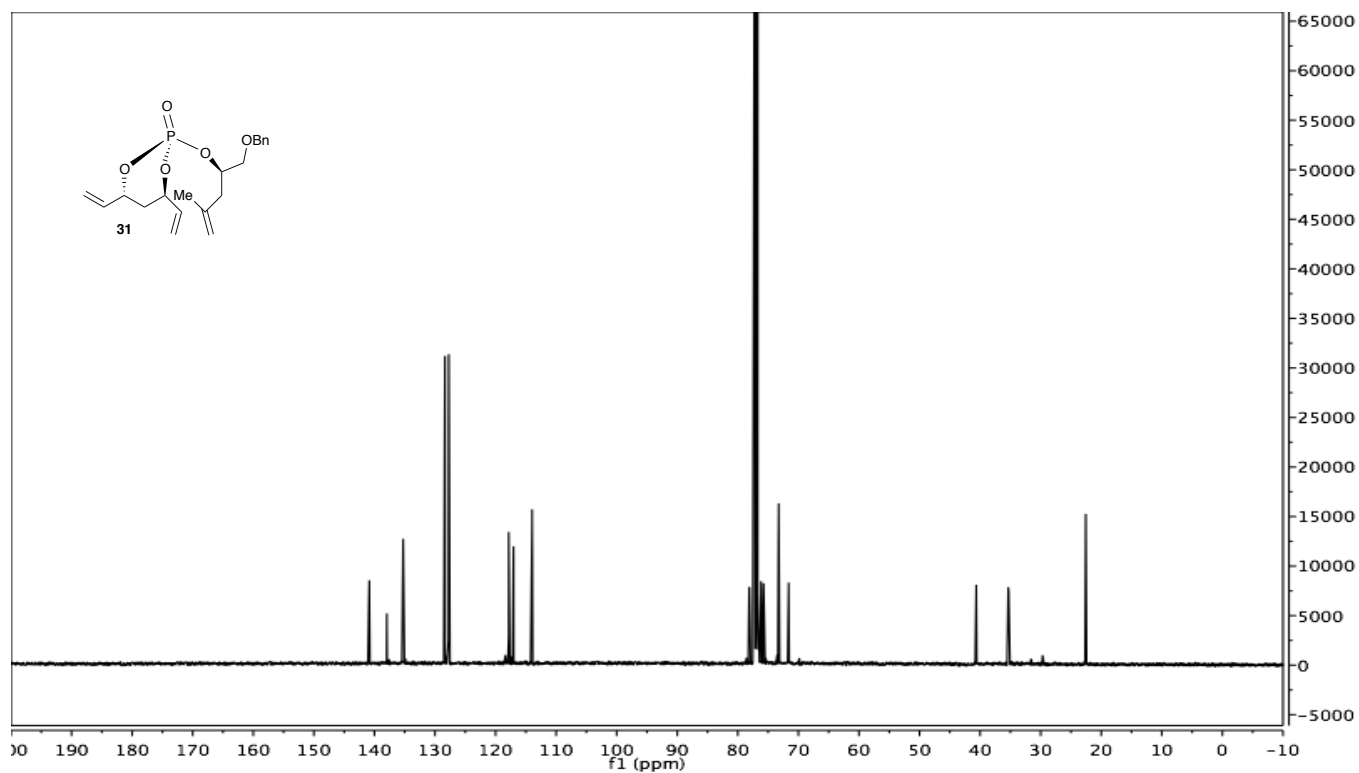

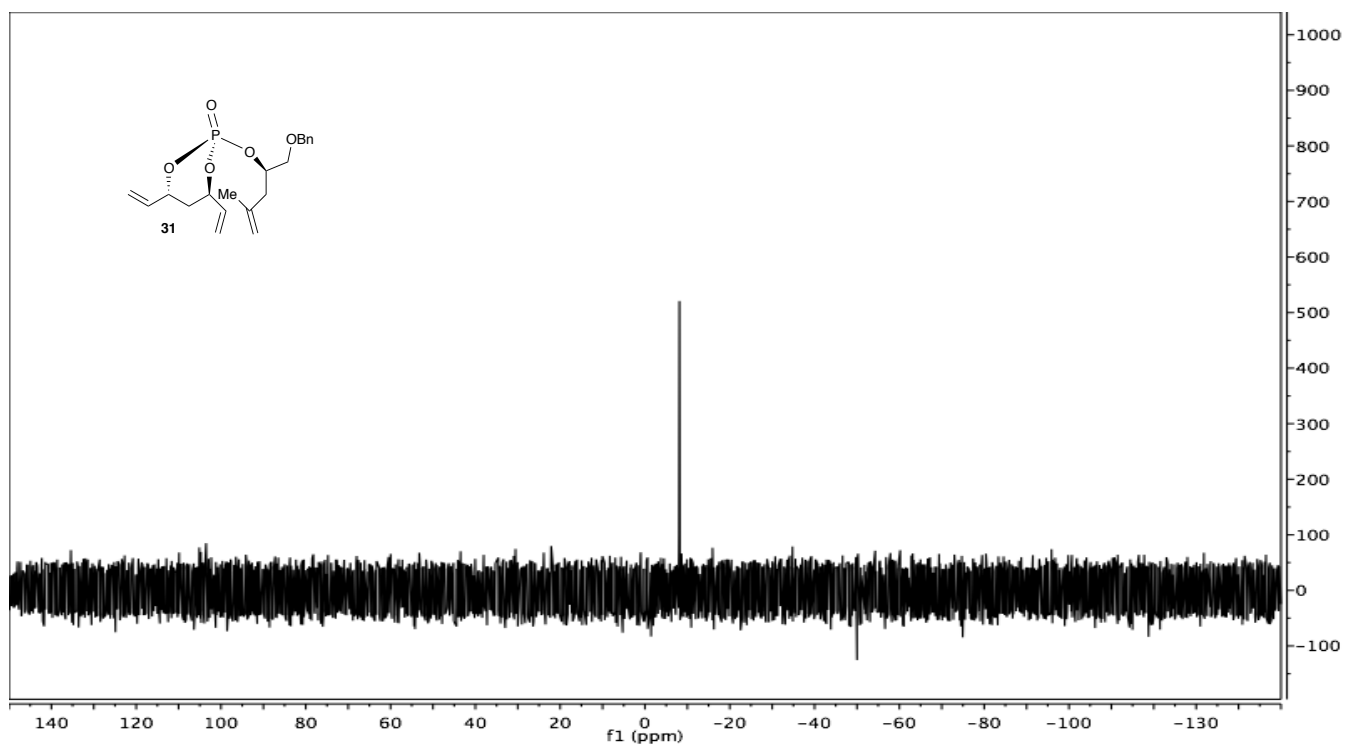

**(1*R*,3*R*,7*R*,9*R*,*Z*)-3-((benzyloxy)methyl)-9-vinyl-2,10,11-trioxa-1-phosphabicyclo[5.3.1]undec-5-ene 1-oxide**  
**(*cis*-32):**

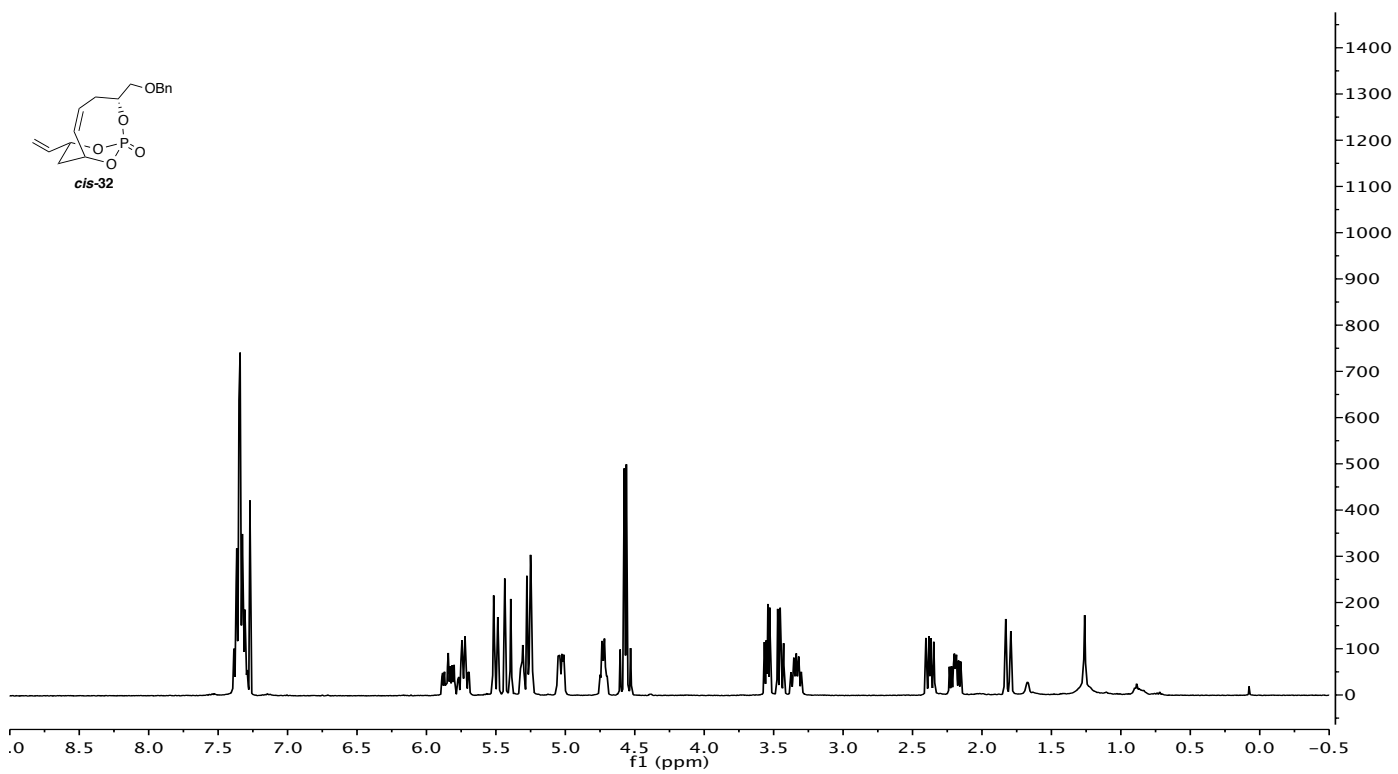

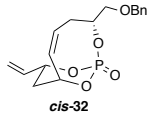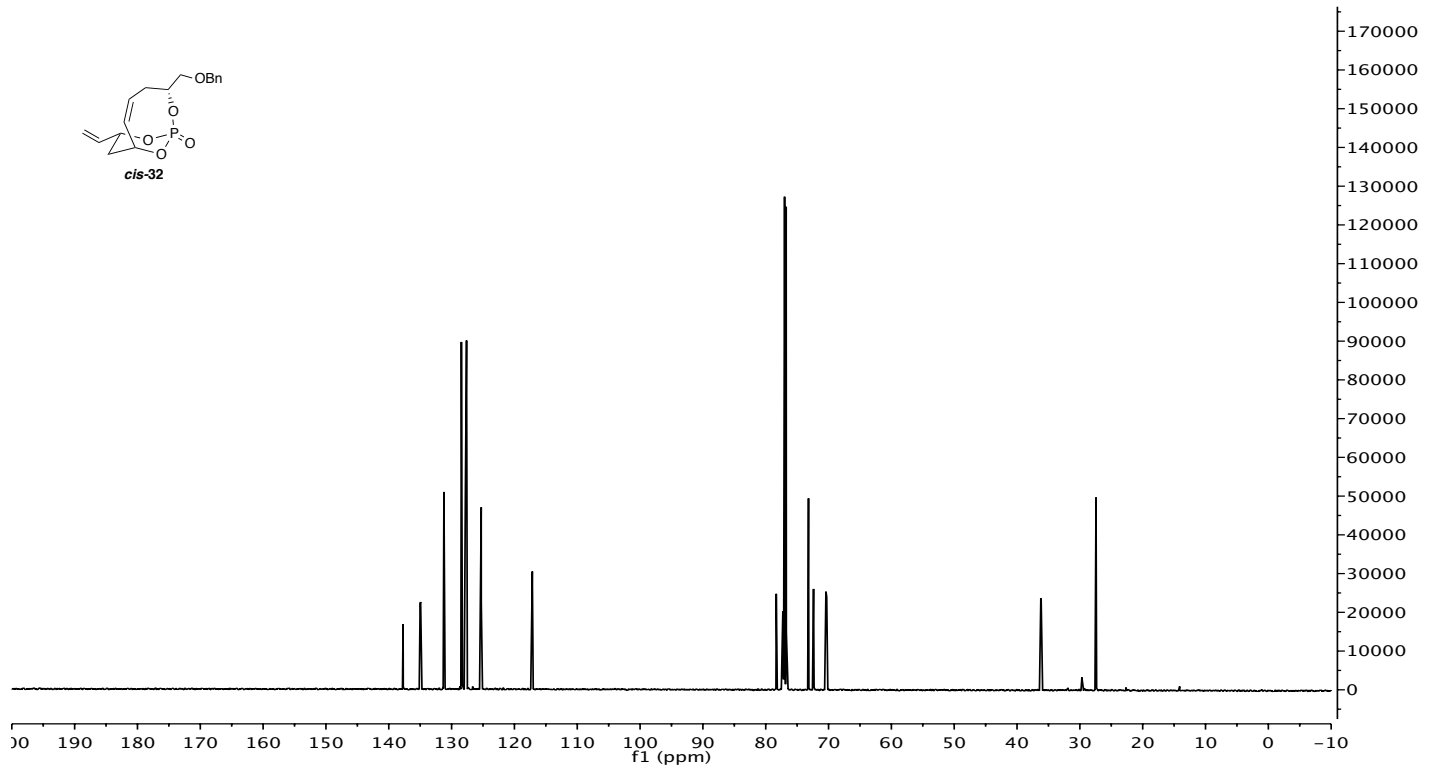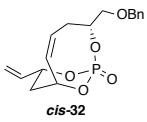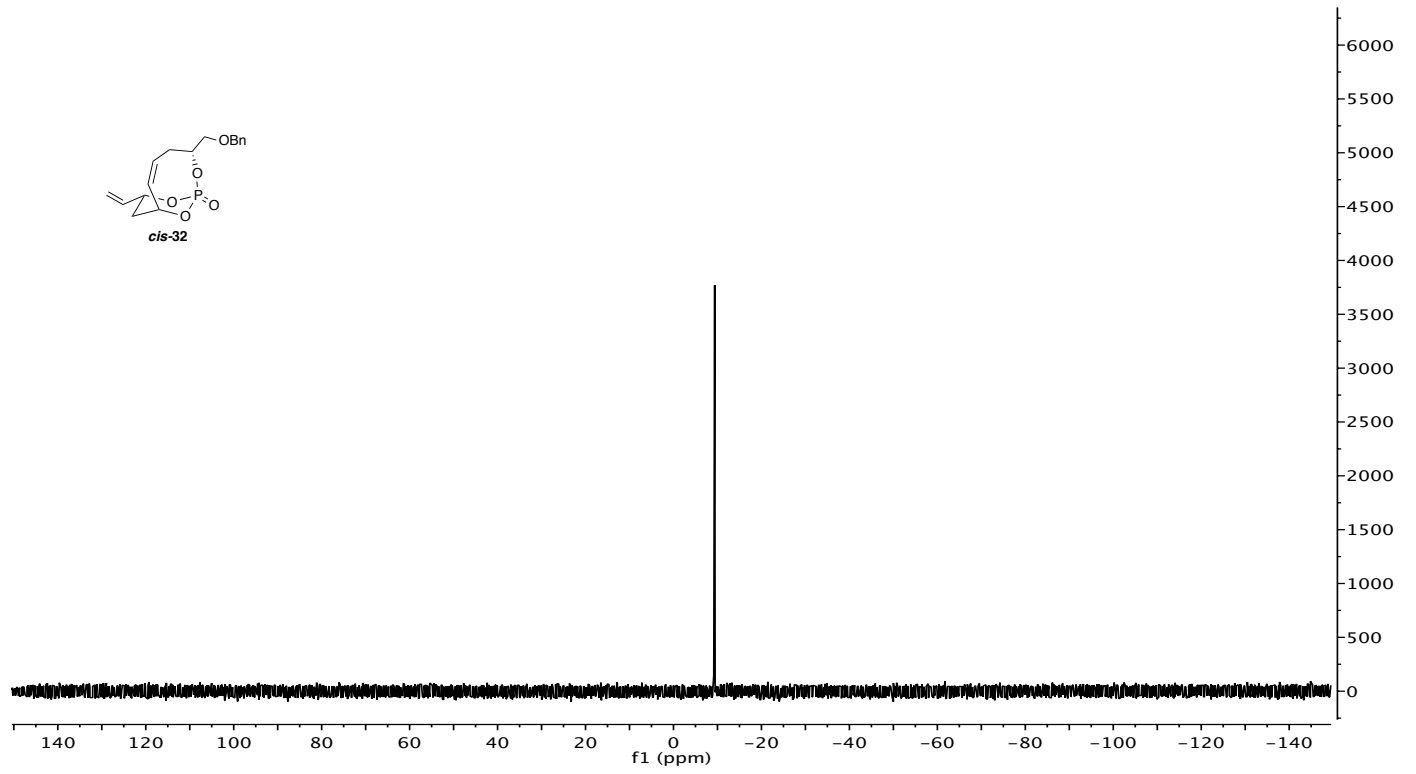

**(4*R*,6*R*)-2-(((1*R*,2*S*)-2-methyl-1-(4-nitrophenyl)but-3-en-1-yl)oxy)-4,6-divinyl-1,3,2-dioxaphosphinane 2-oxide**

**(36):**

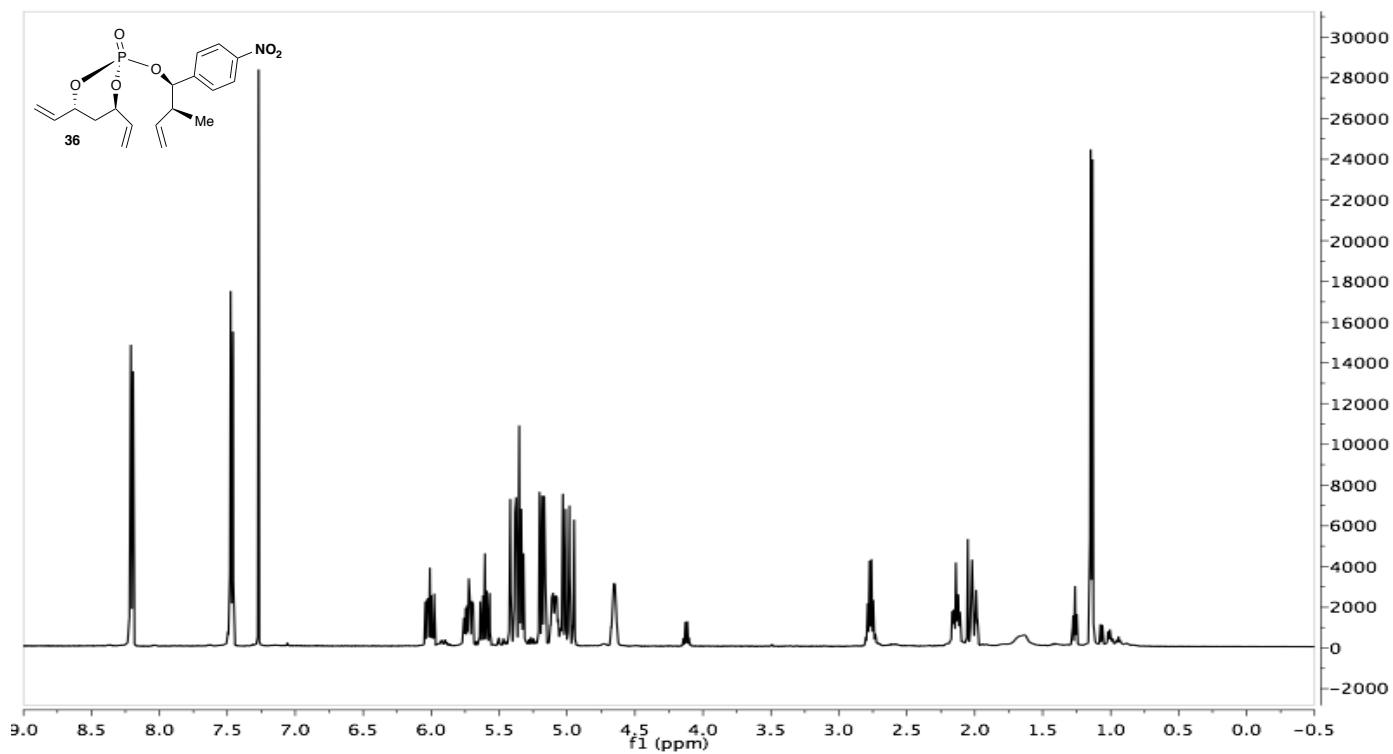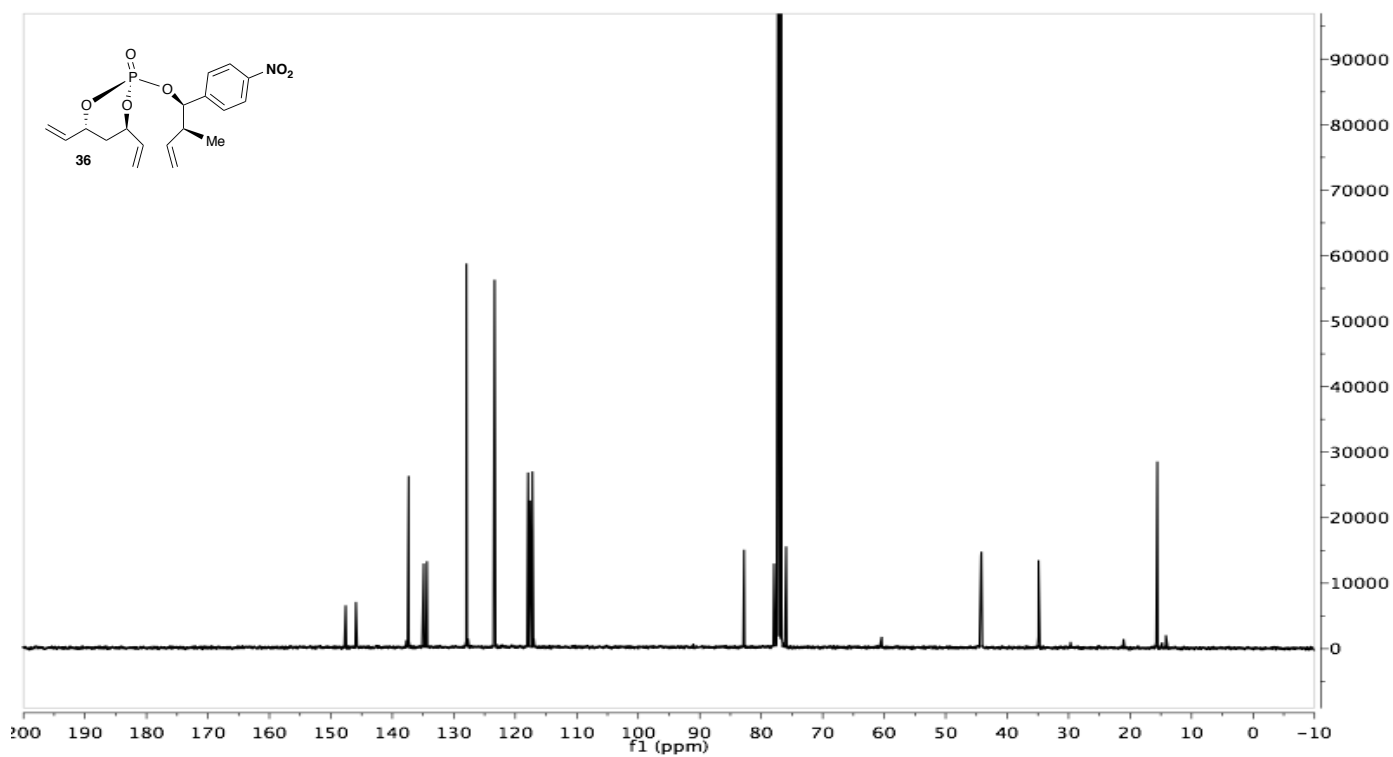

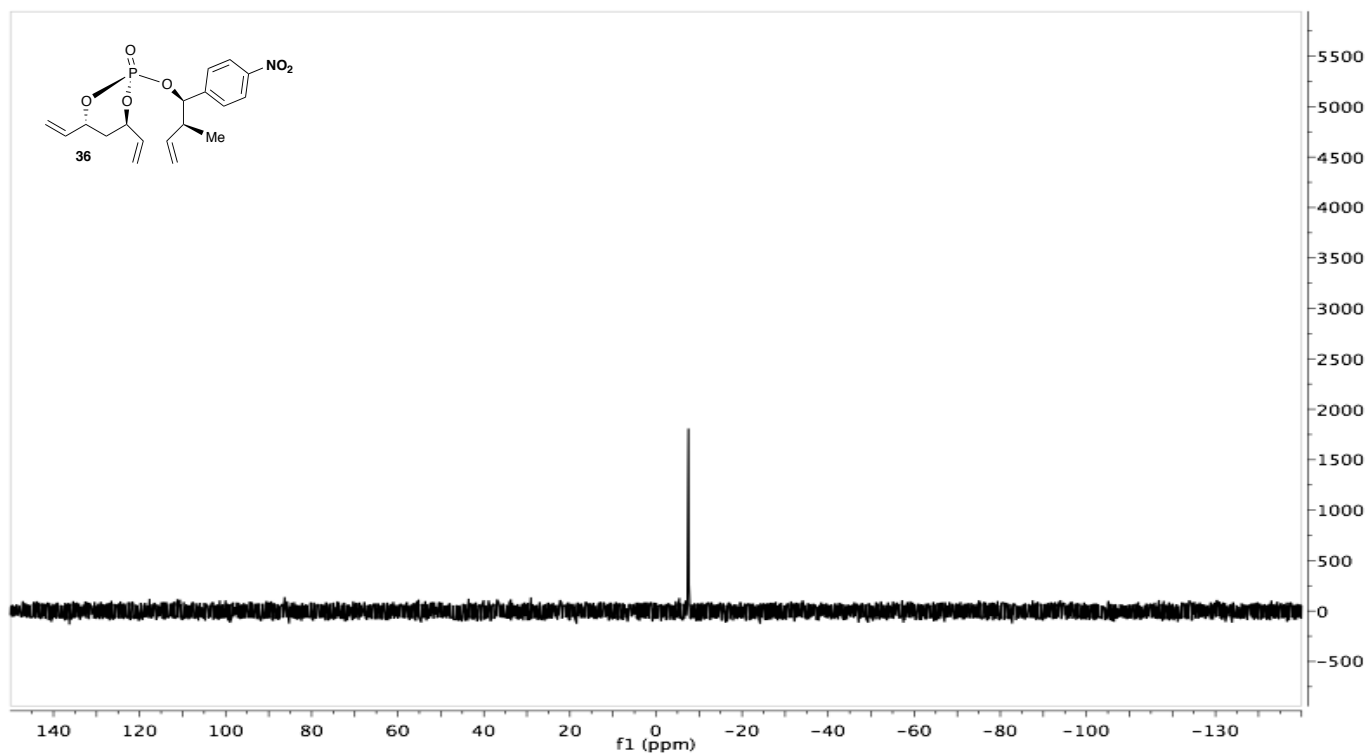

**(4*R*,6*R*)-2-(((1*R*,2*R*)-2-methyl-1-(4-nitrophenyl)but-3-en-1-yl)oxy)-4,6-divinyl-1,3,2-dioxaphosphinane 2-oxide (37):**

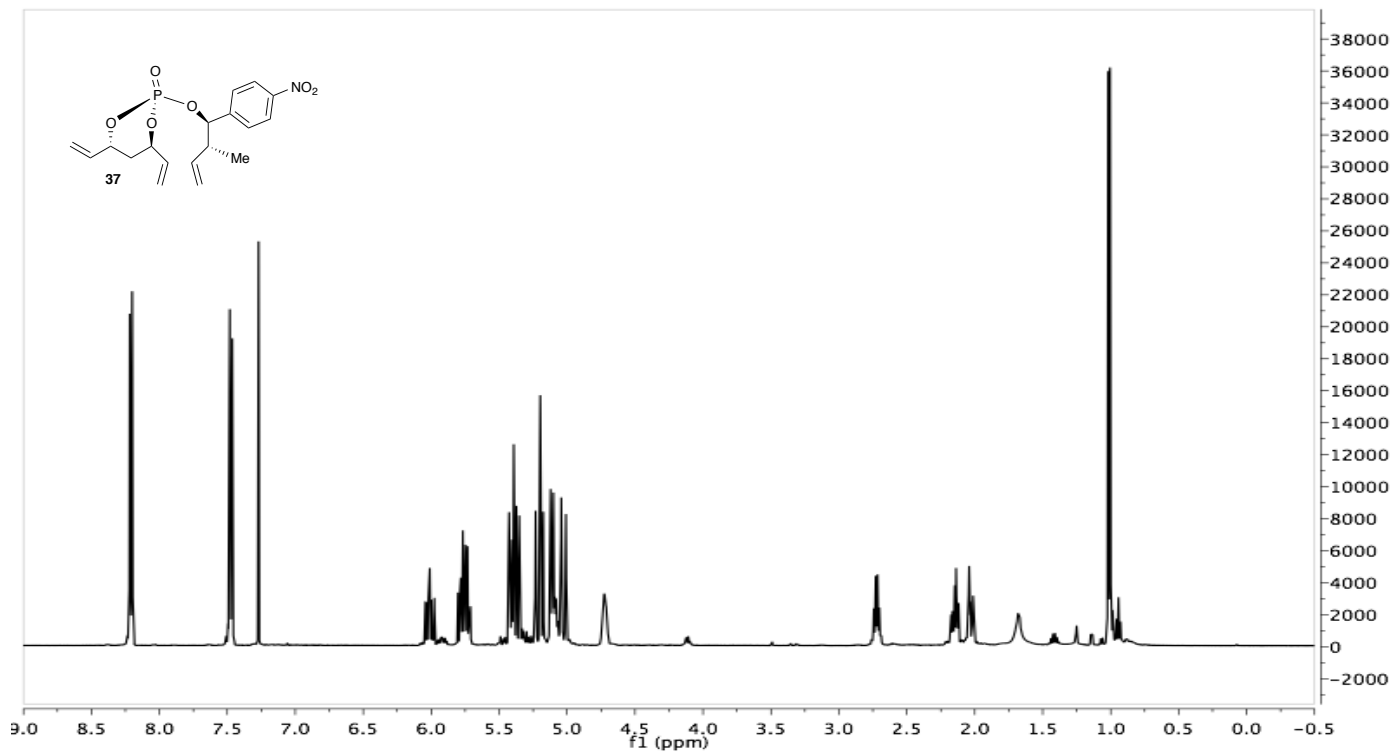

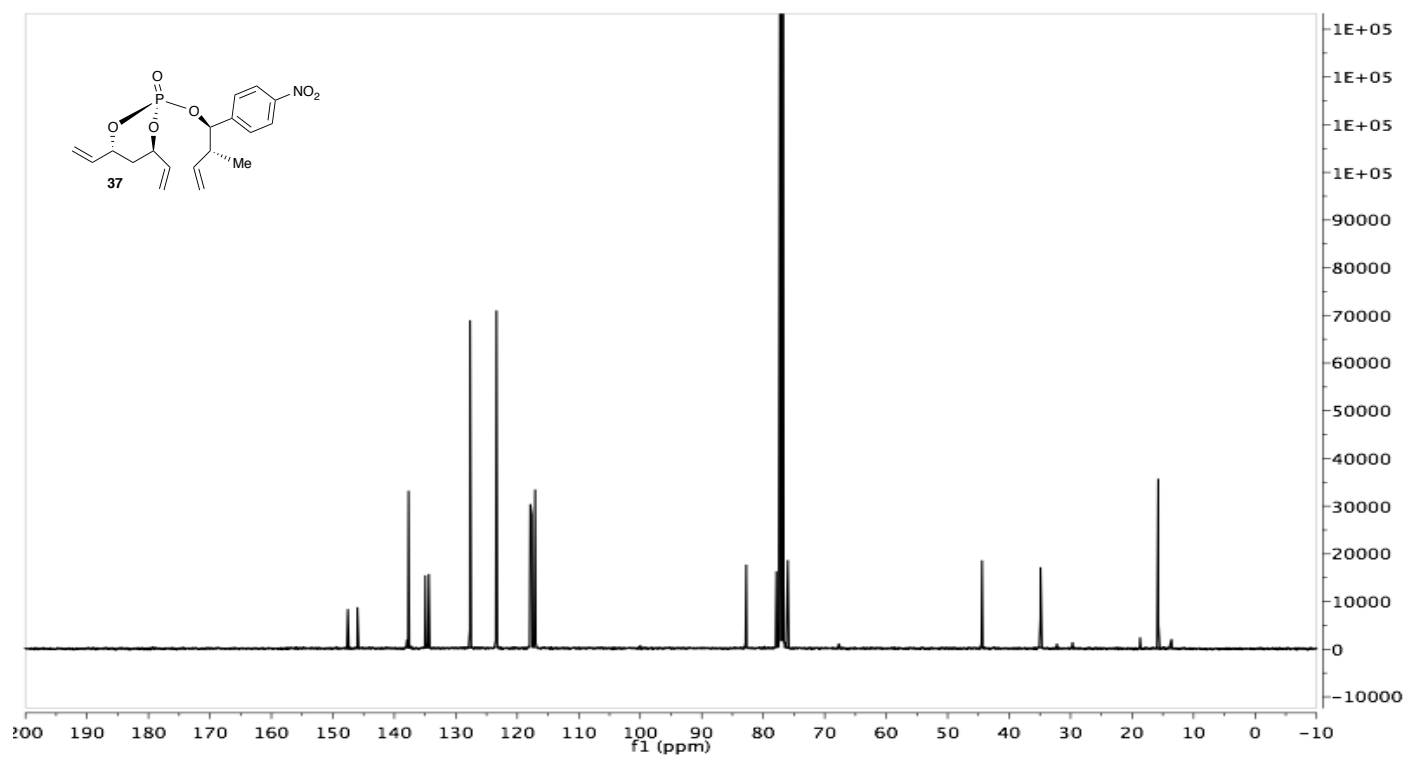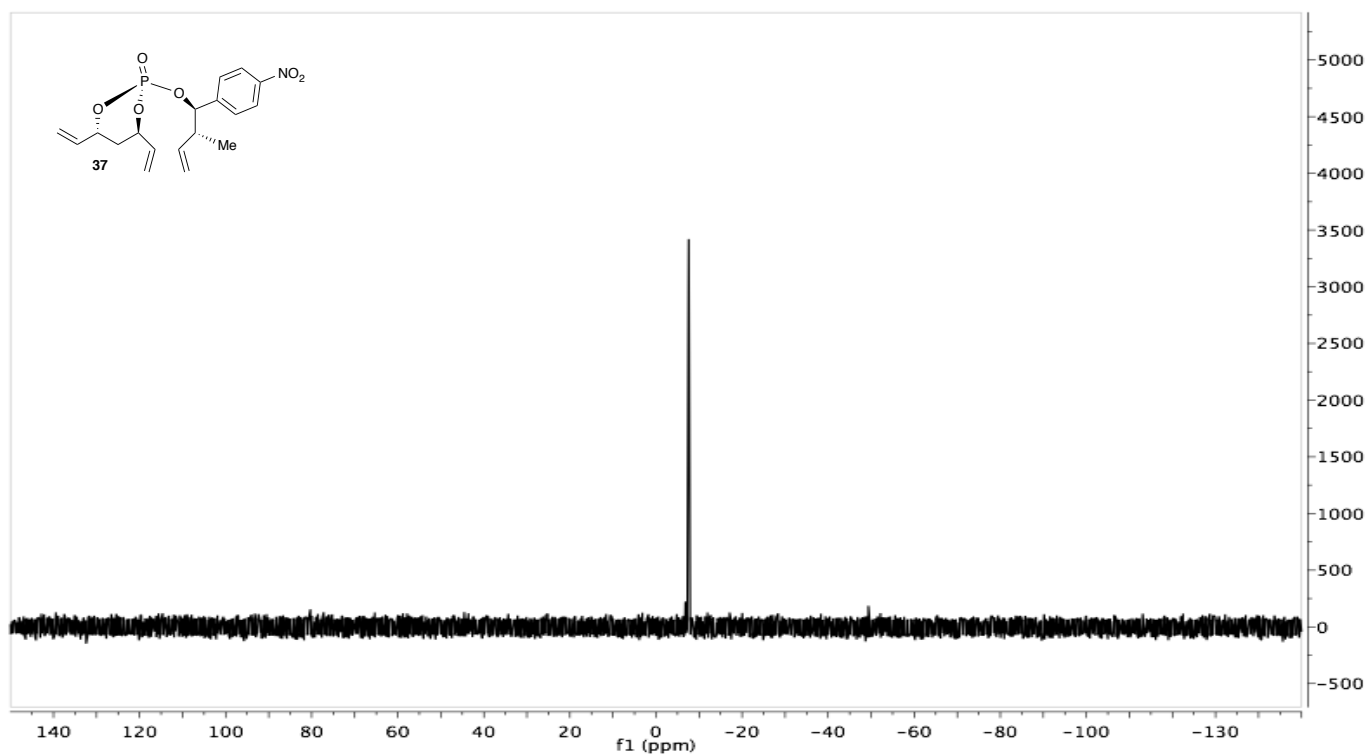

**(1*R*,3*R*,4*S*,7*R*,9*R*,*Z*)-4-methyl-3-(4-nitrophenyl)-9-vinyl-2,10,11-trioxa-1 phosphabicyclo[5.3.1]undec-5-ene 1-oxide (*cis*,*syn*-38):**

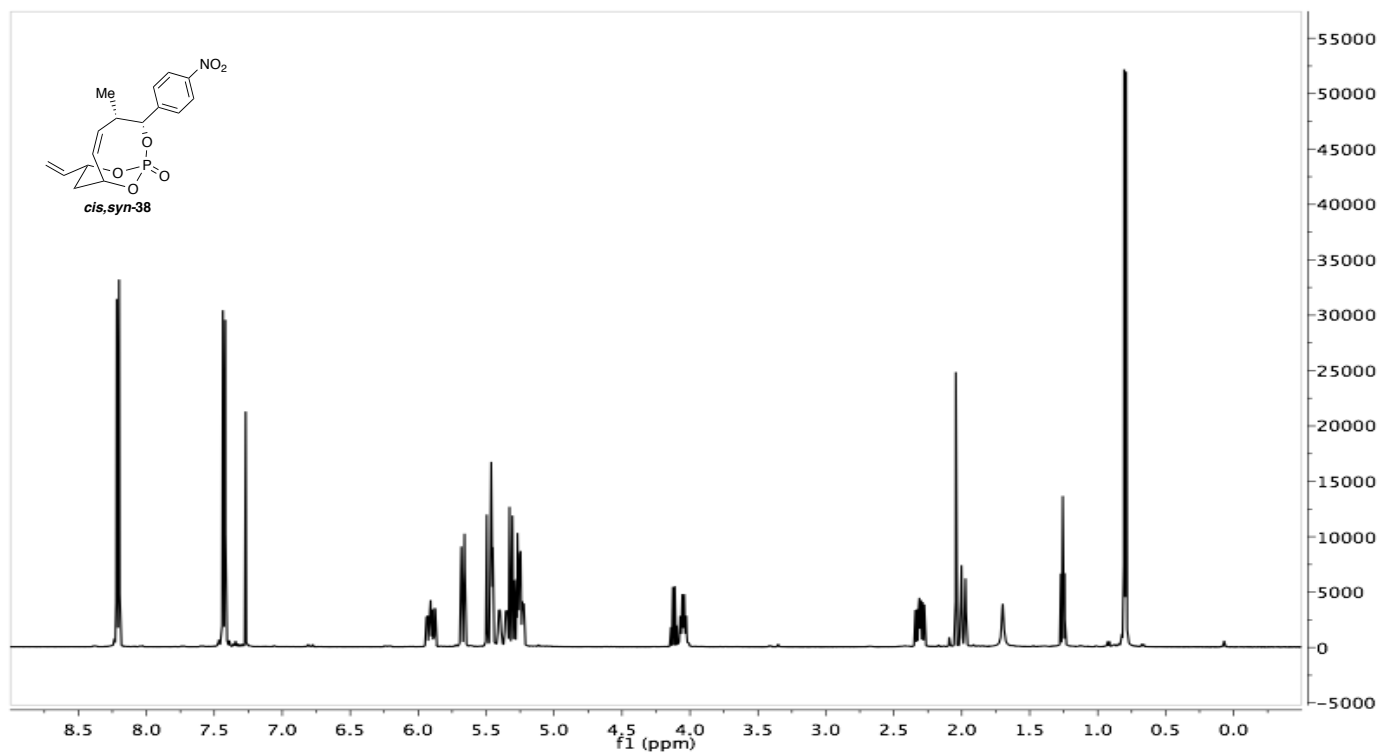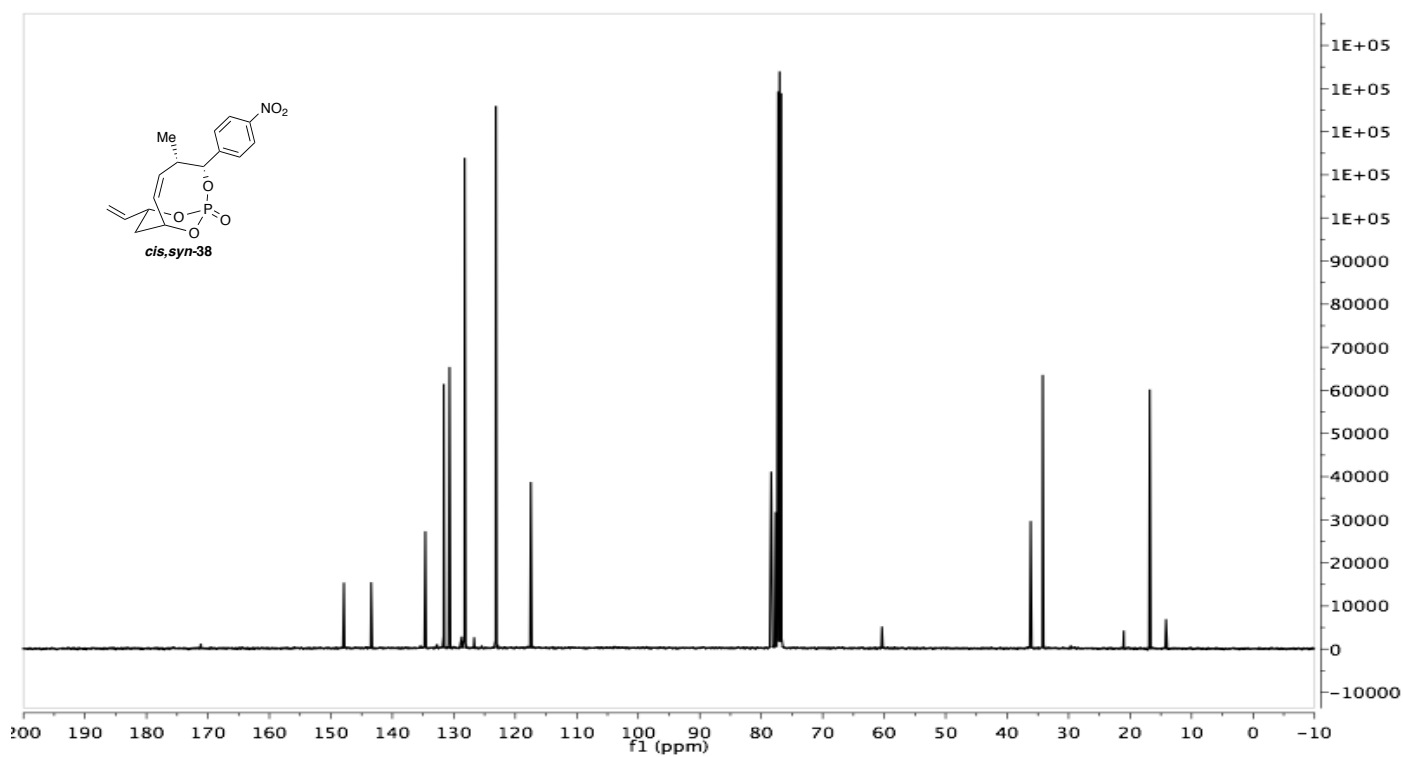

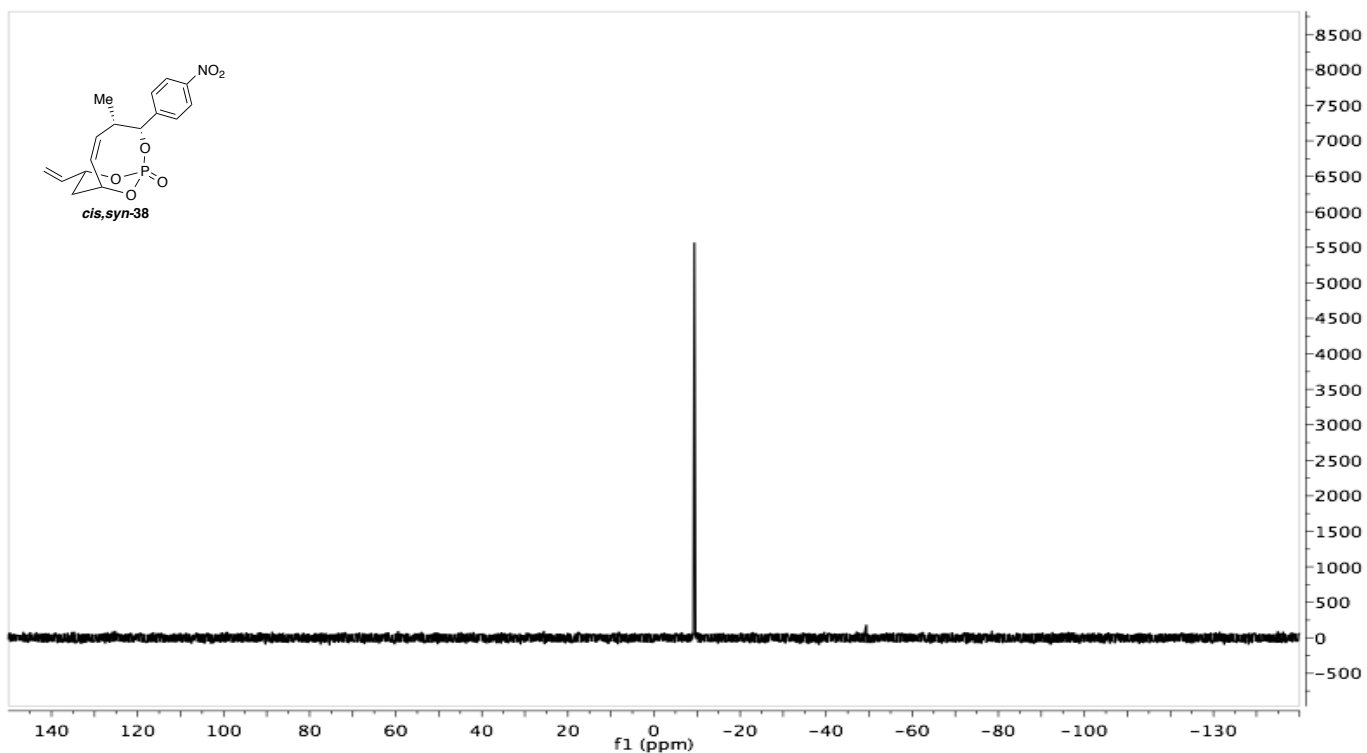

**(4*S*,6*S*)-2-(((1*R*,2*S*)-2-methyl-1-(4-nitrophenyl)but-3-en-1-yl)oxy)-4,6-divinyl-1,3,2-dioxaphosphinane 2-oxide (40):**

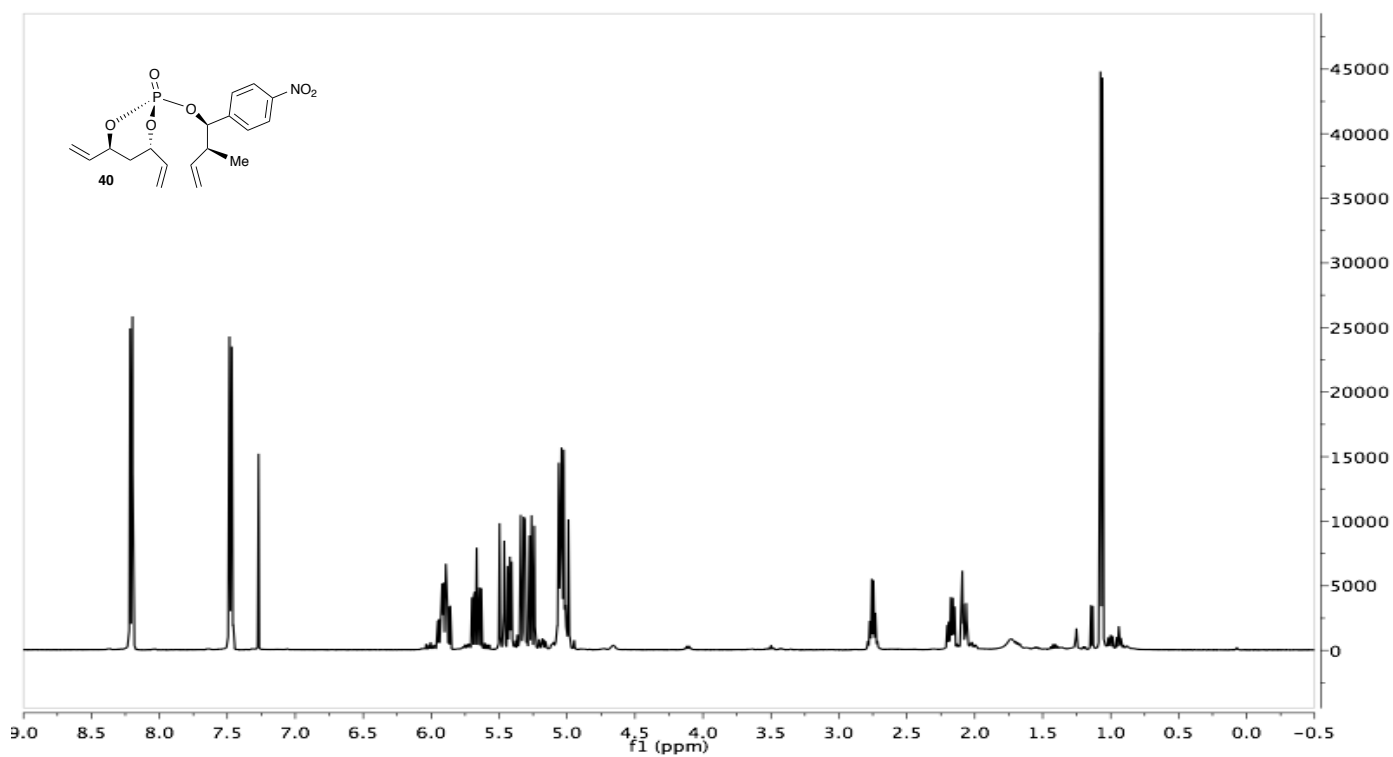



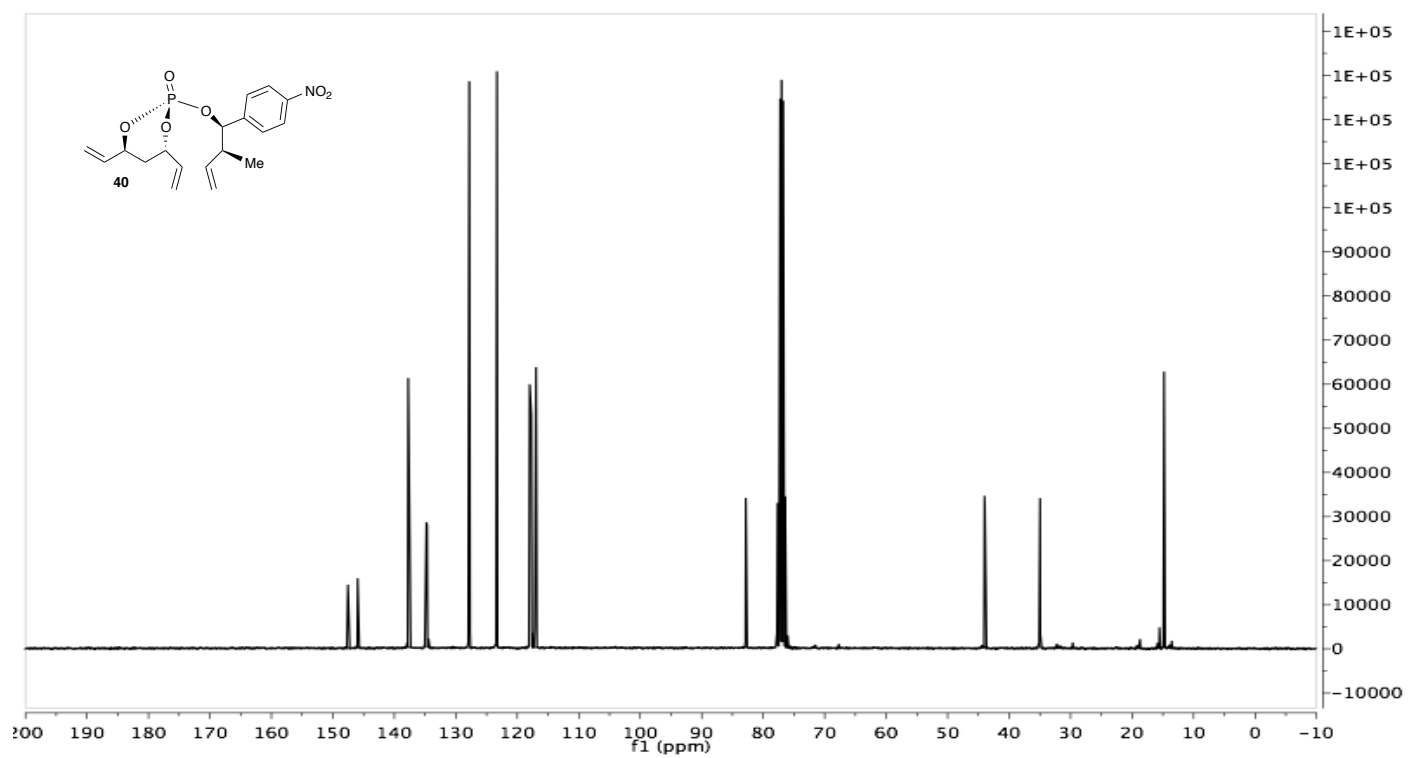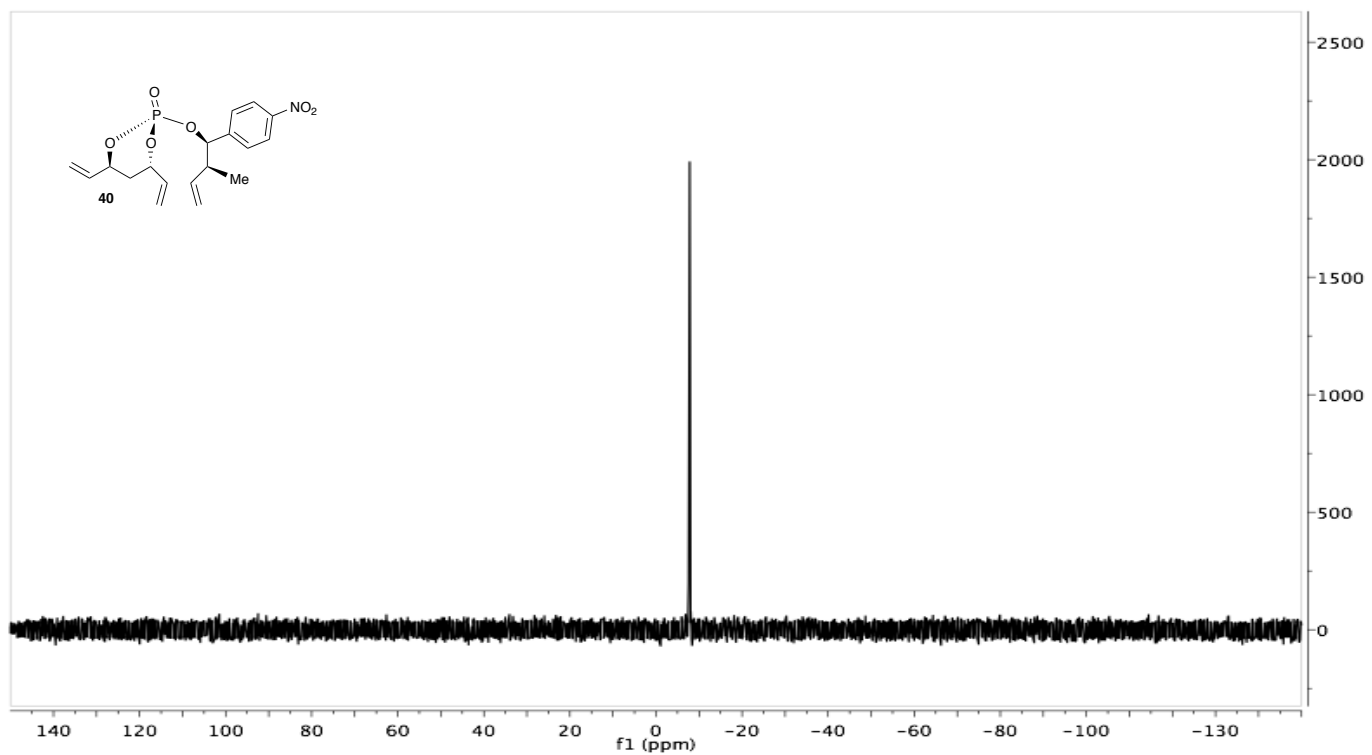

**(4*S*,6*S*)-2-(((1*R*,2*R*)-2-methyl-1-(4-nitrophenyl)but-3-en-1-yl)oxy)-4,6-divinyl-1,3,2-dioxaphosphinane 2-oxide (41):**

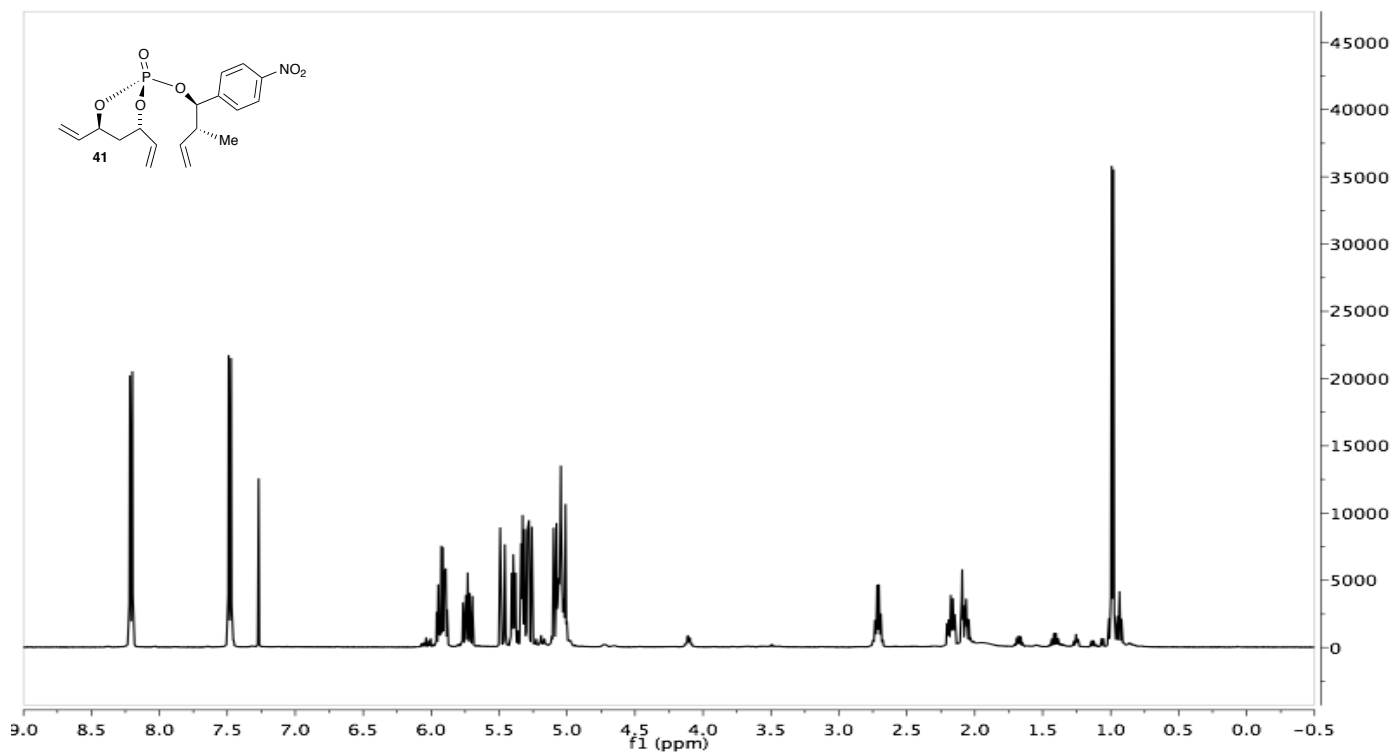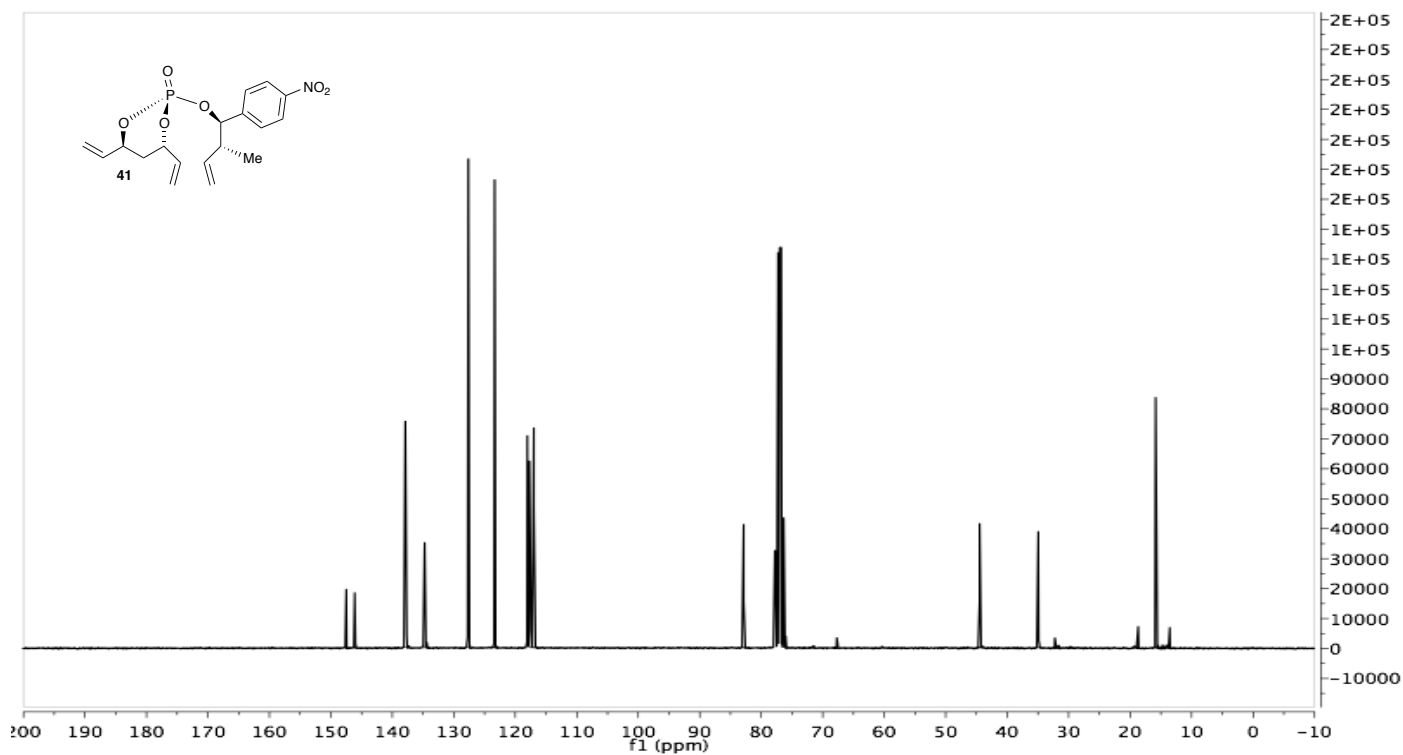

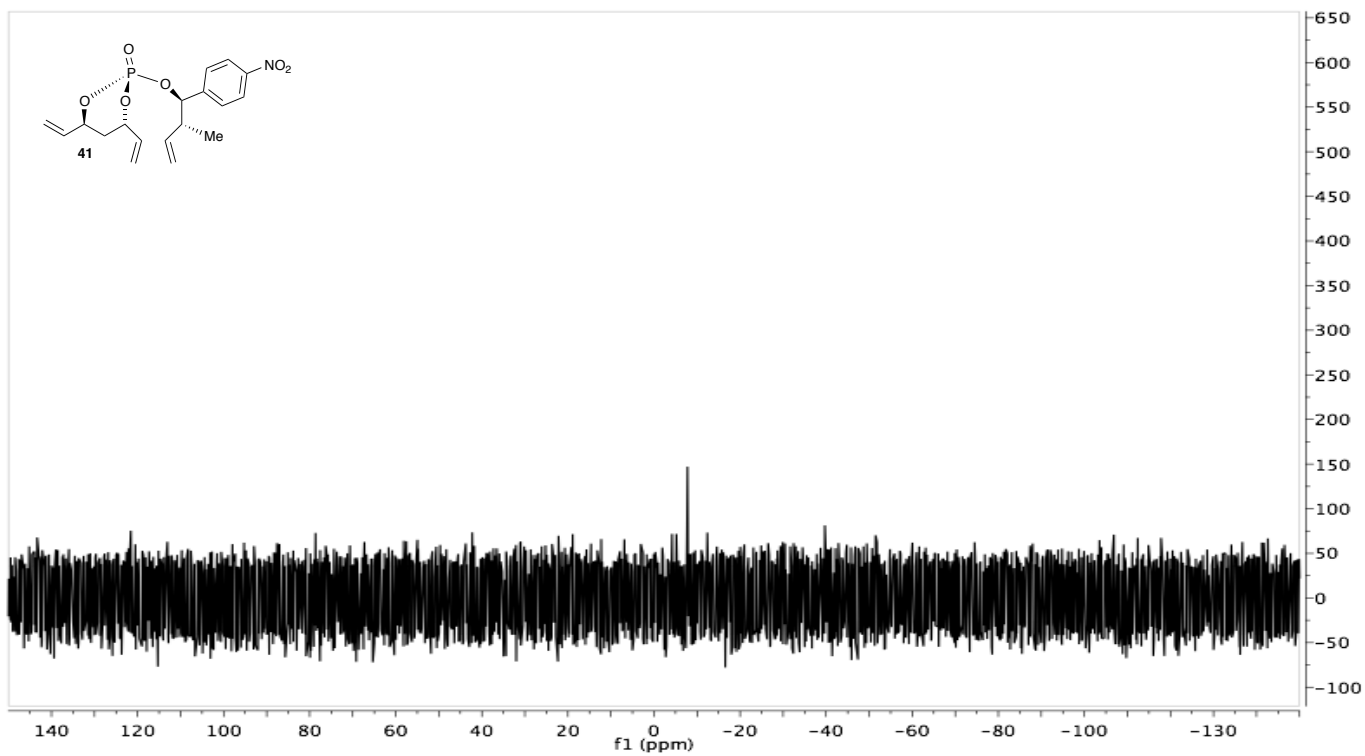

**(1*S*,3*R*,4*R*,7*S*,9*S*,*Z*)-4-methyl-3-(4-nitrophenyl)-9-vinyl-2,10,11-trioxa-1-phosphabicyclo[5.3.1]undec-5-ene 1-oxide (*trans,anti*-43):**

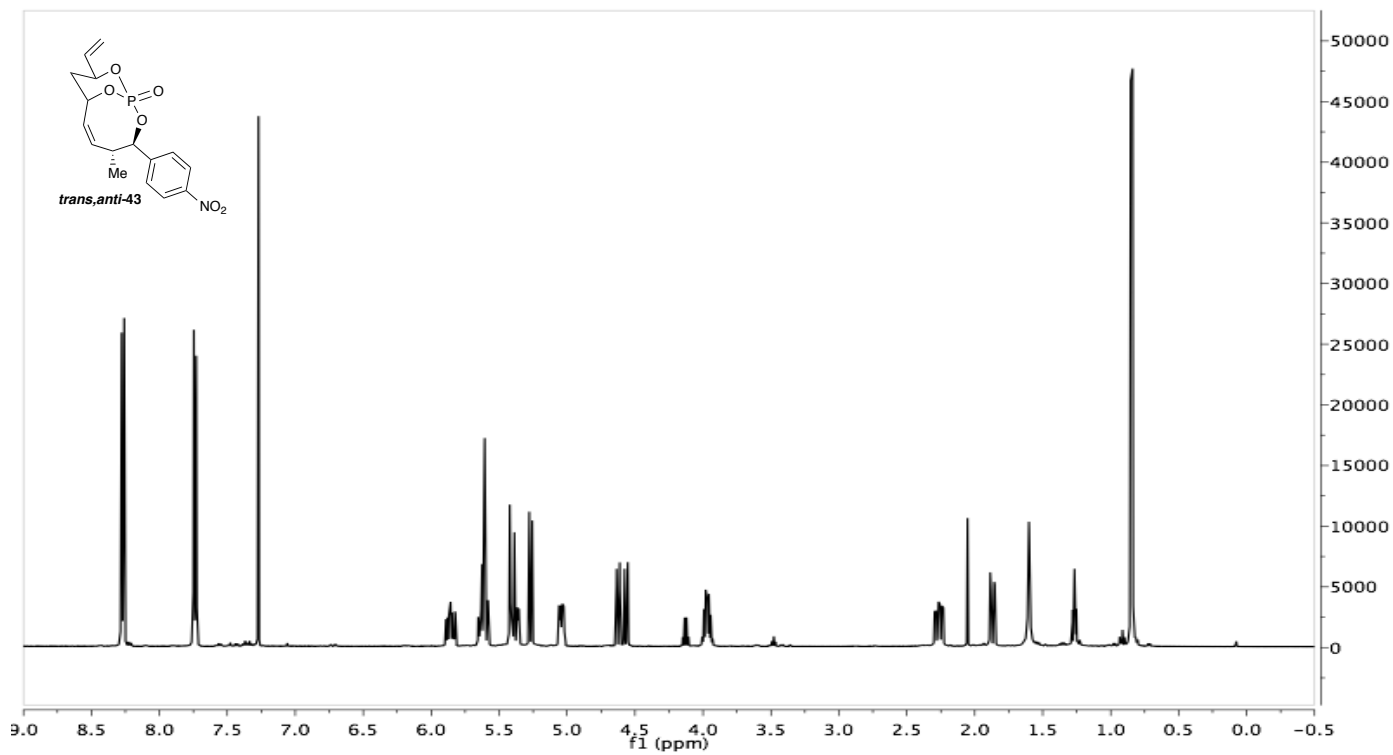

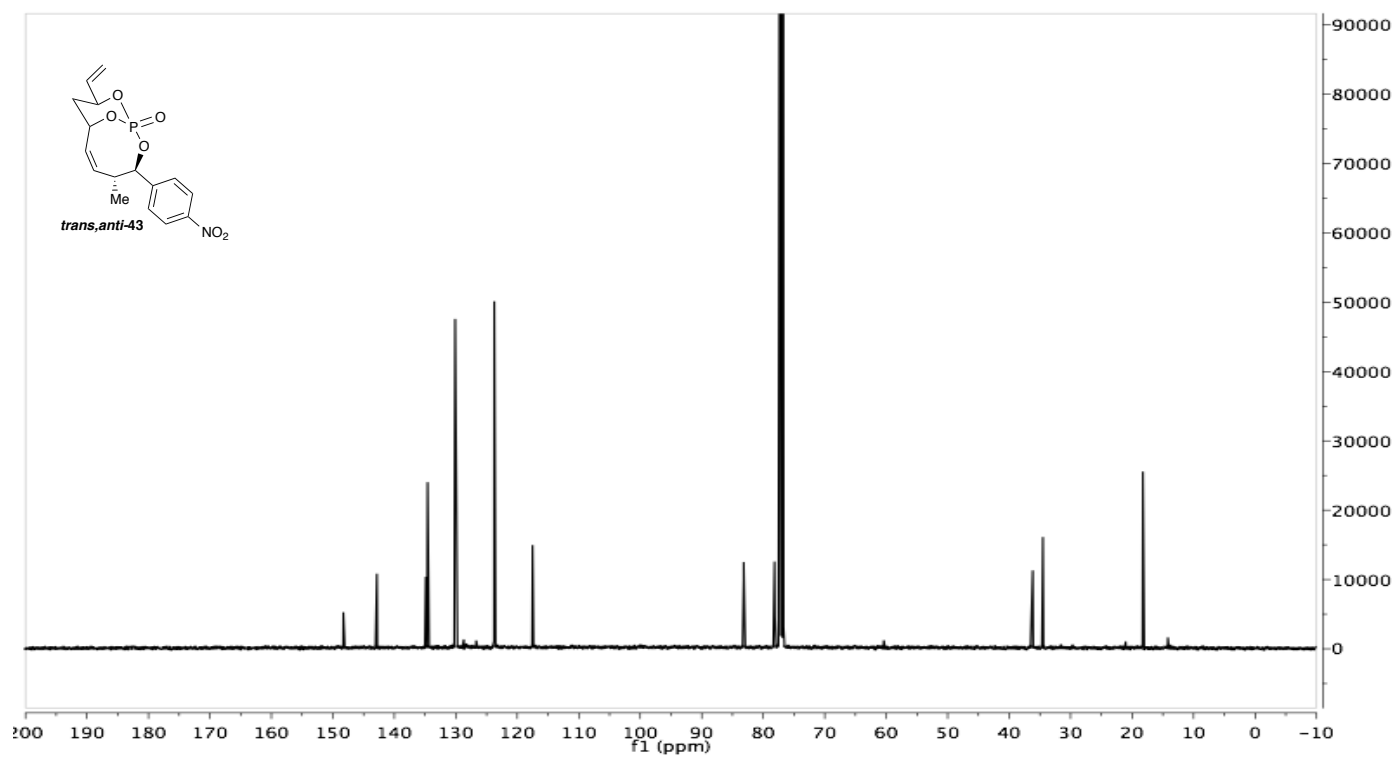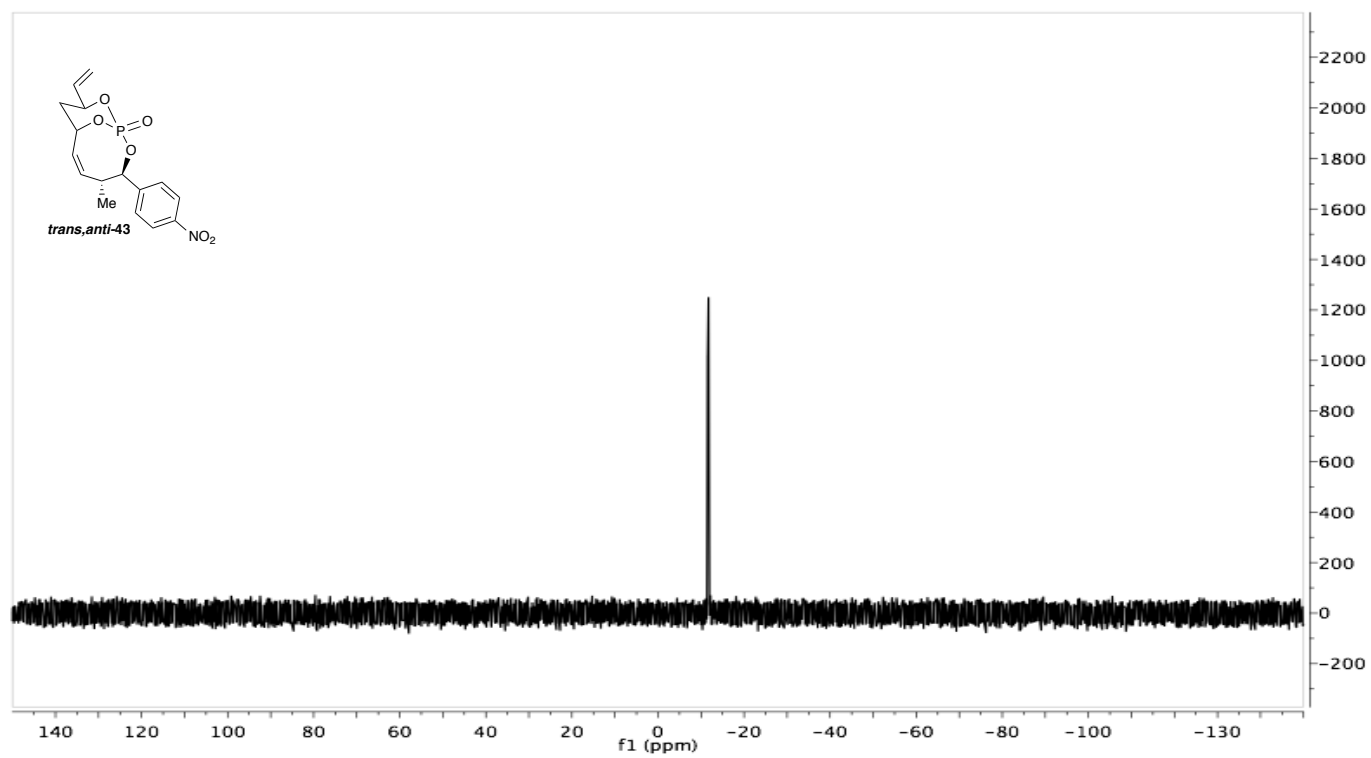

**(4*S*,6*S*)-2-((2-methylbut-3-en-1-yl)oxy)-4,6-divinyl-1,3,2-dioxaphosphinane 2-oxide (45a):**

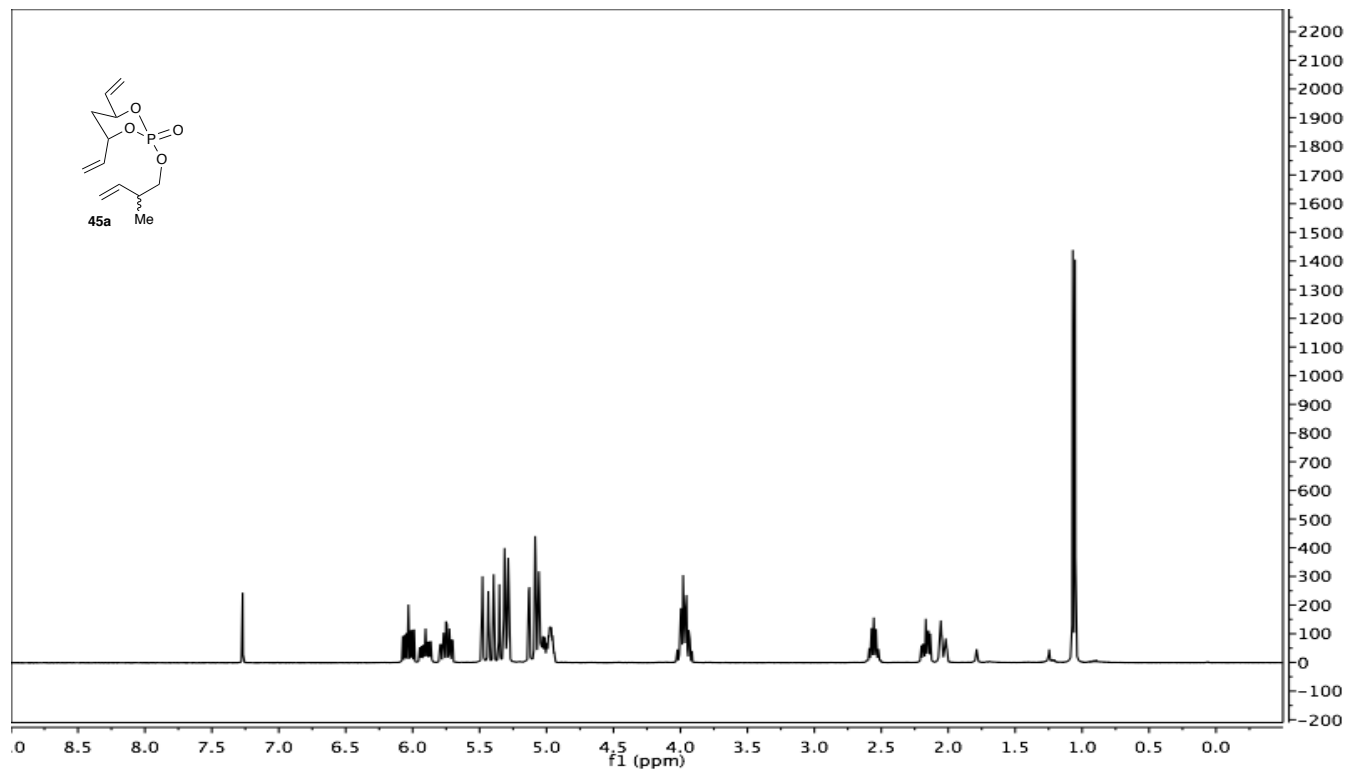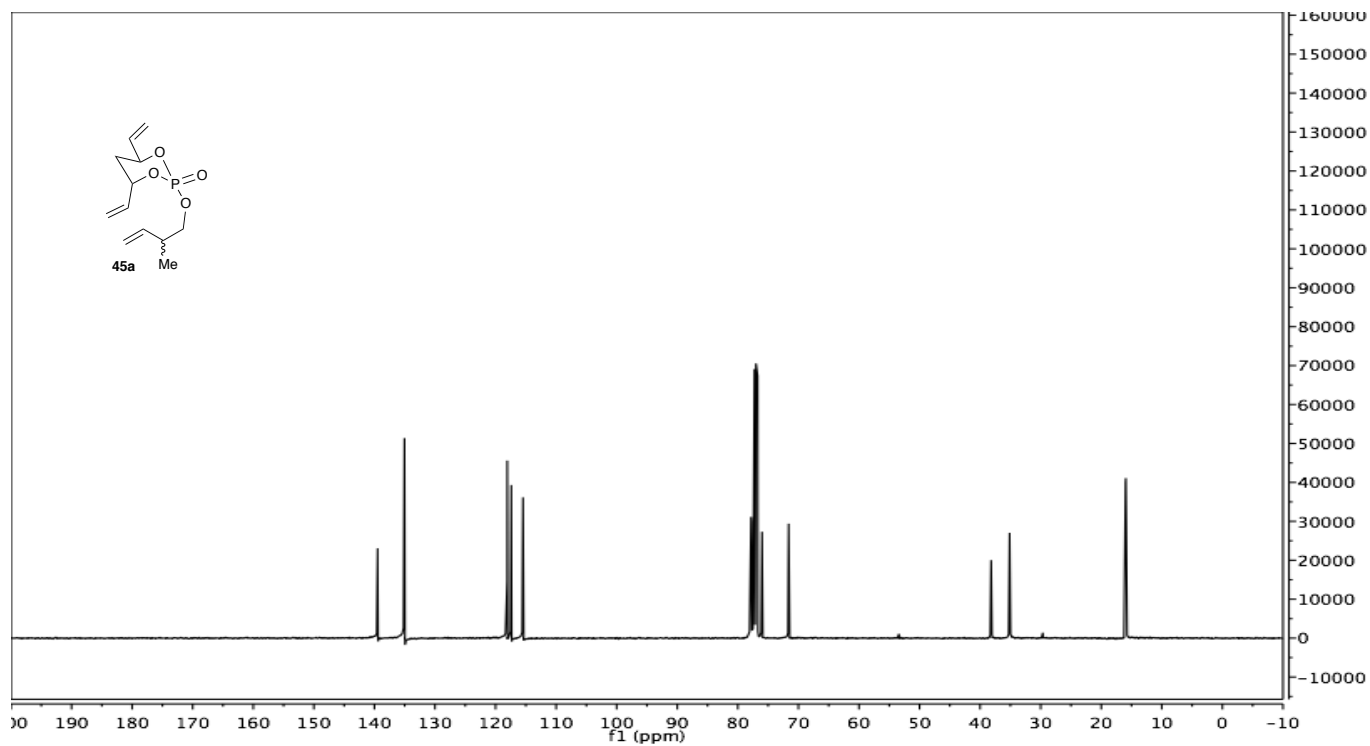

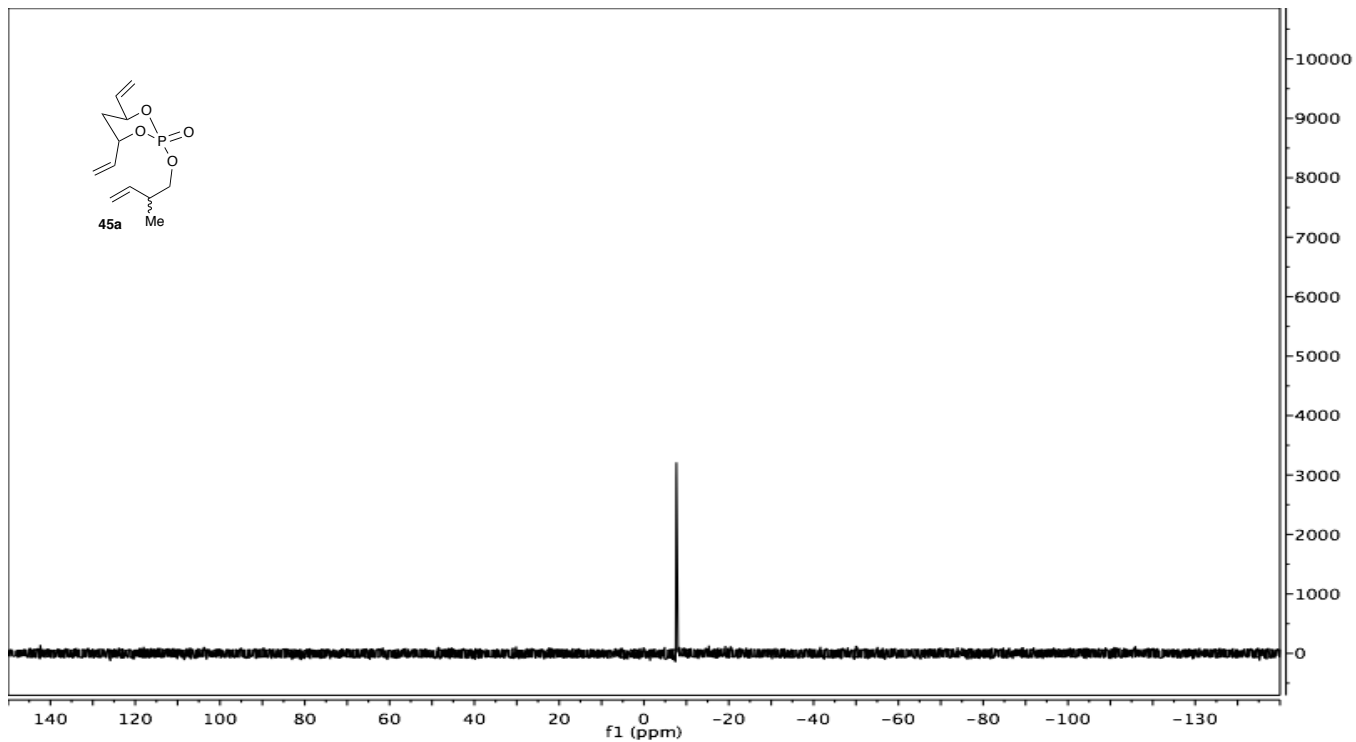

**(4*S*,6*S*)-2-(((*S*)-2-methylbut-3-en-1-yl)oxy)-4,6-divinyl-1,3,2-dioxaphosphinane 2-oxide (45b):**

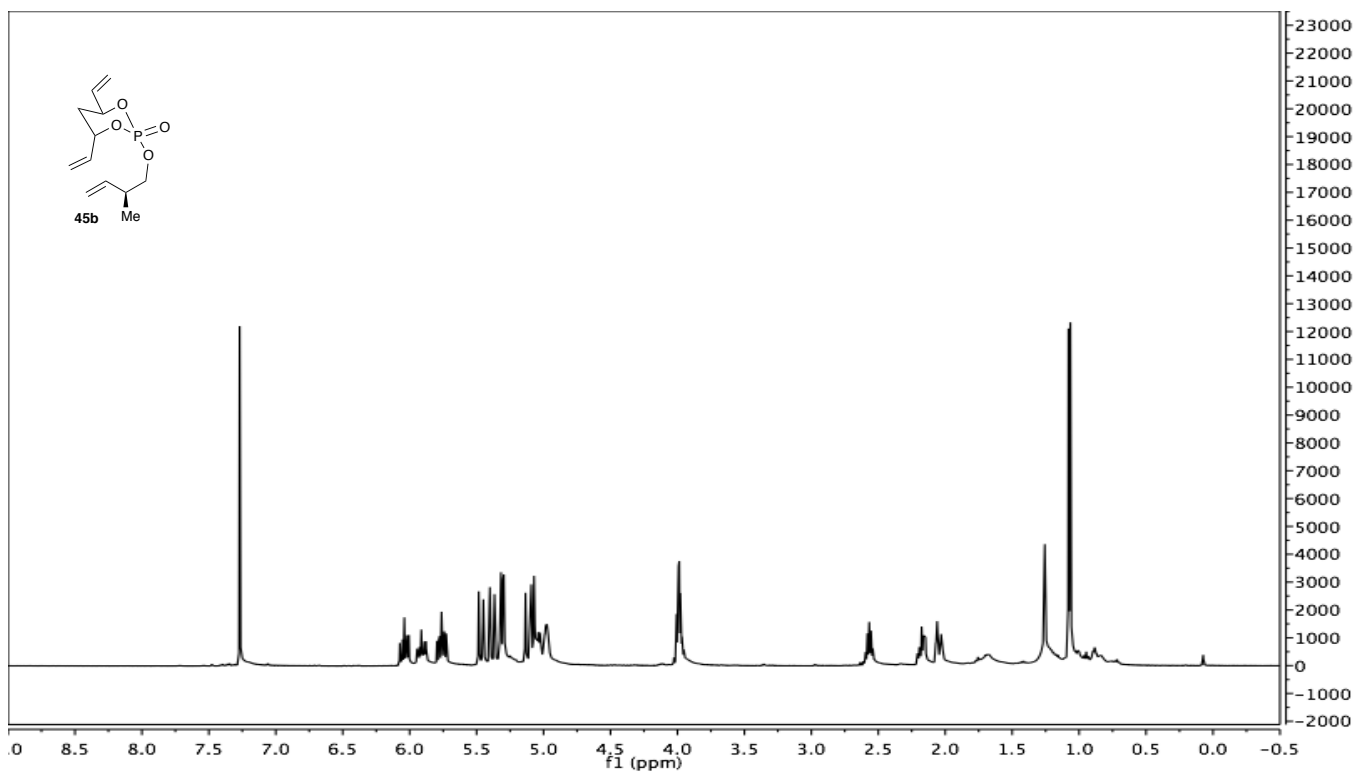

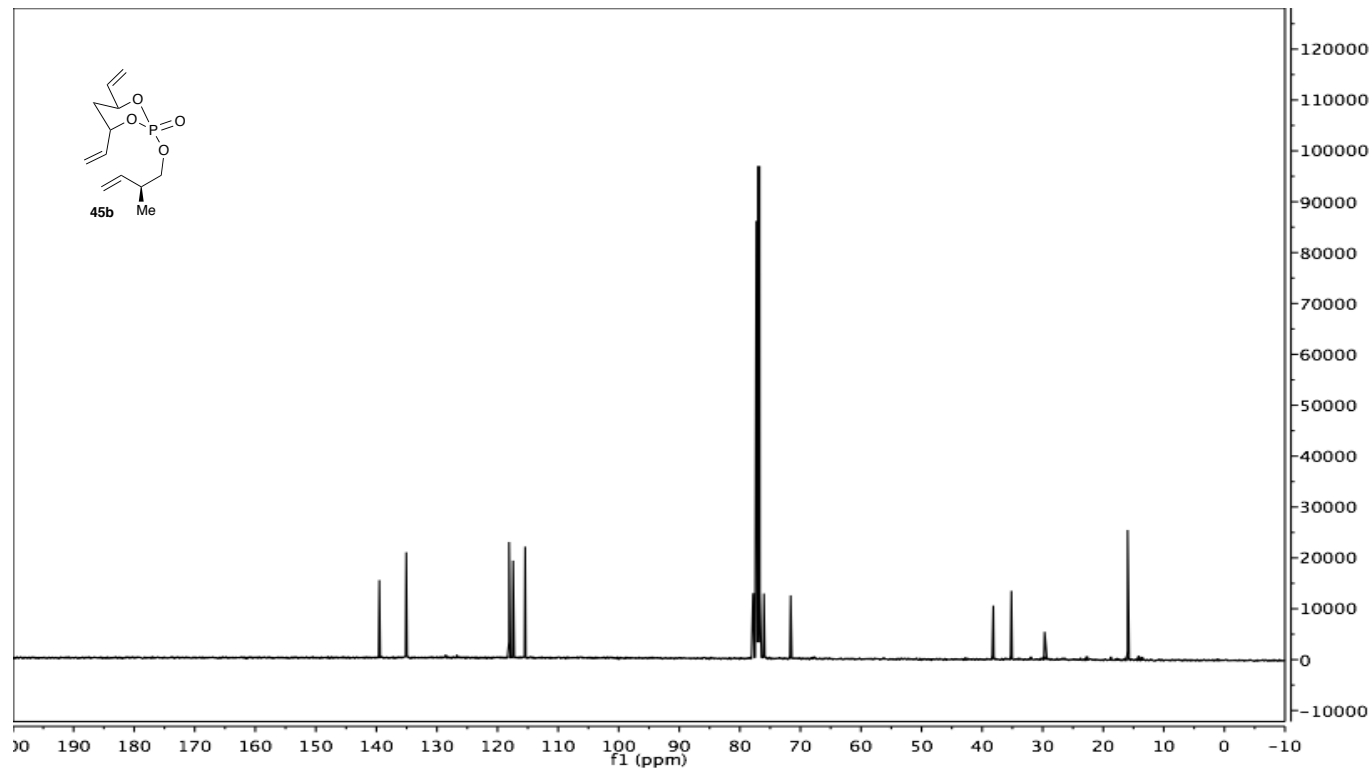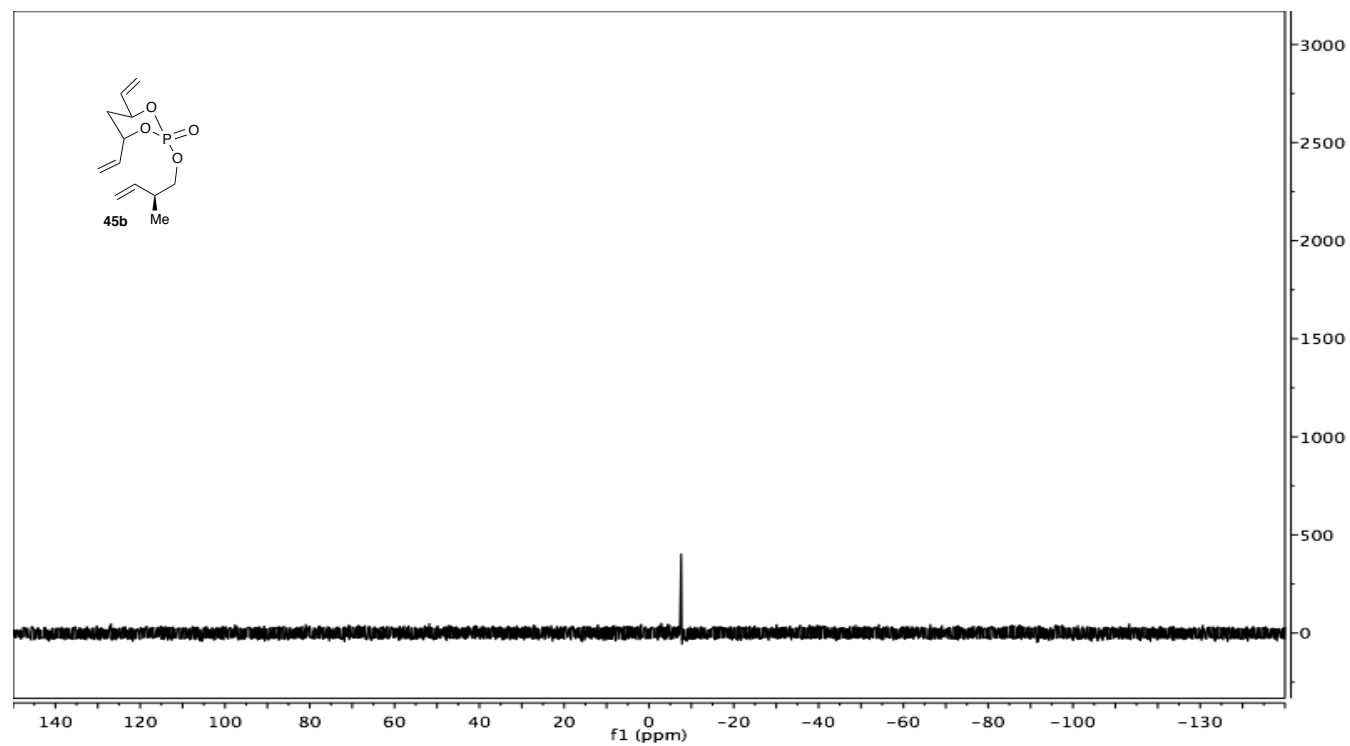

(1*S*,4*R*,7*S*,9*S*,*Z*)-4-methyl-9-vinyl-2,10,11-trioxa-1-phosphabicyclo[5.3.1]undec-5-ene 1-oxide (46):

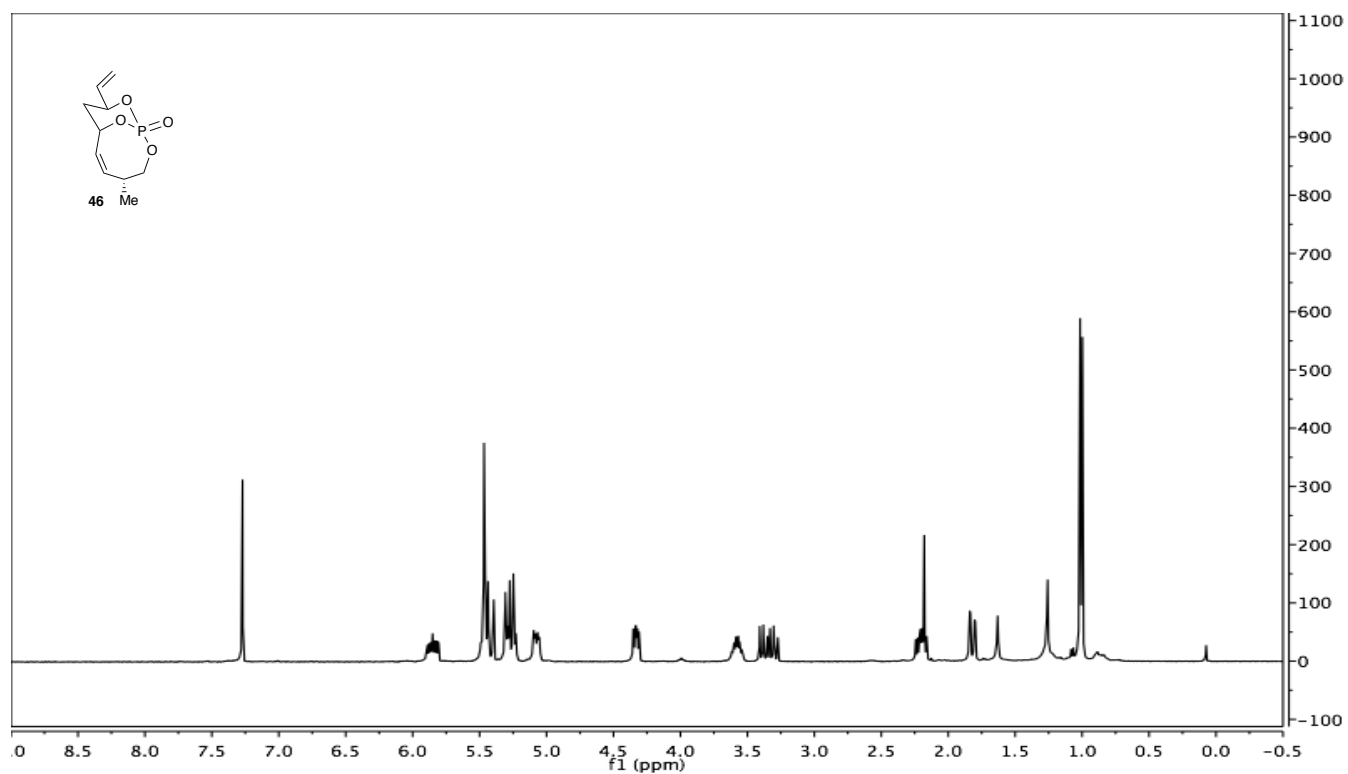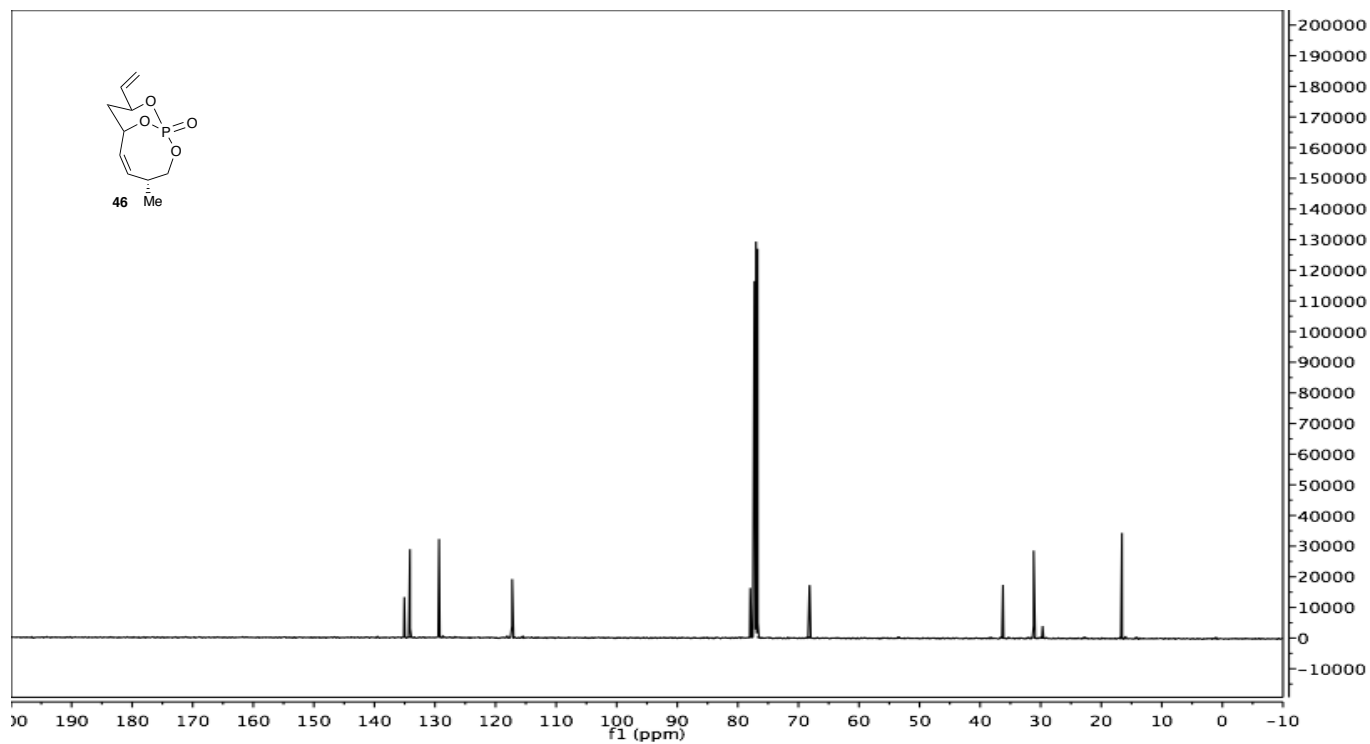



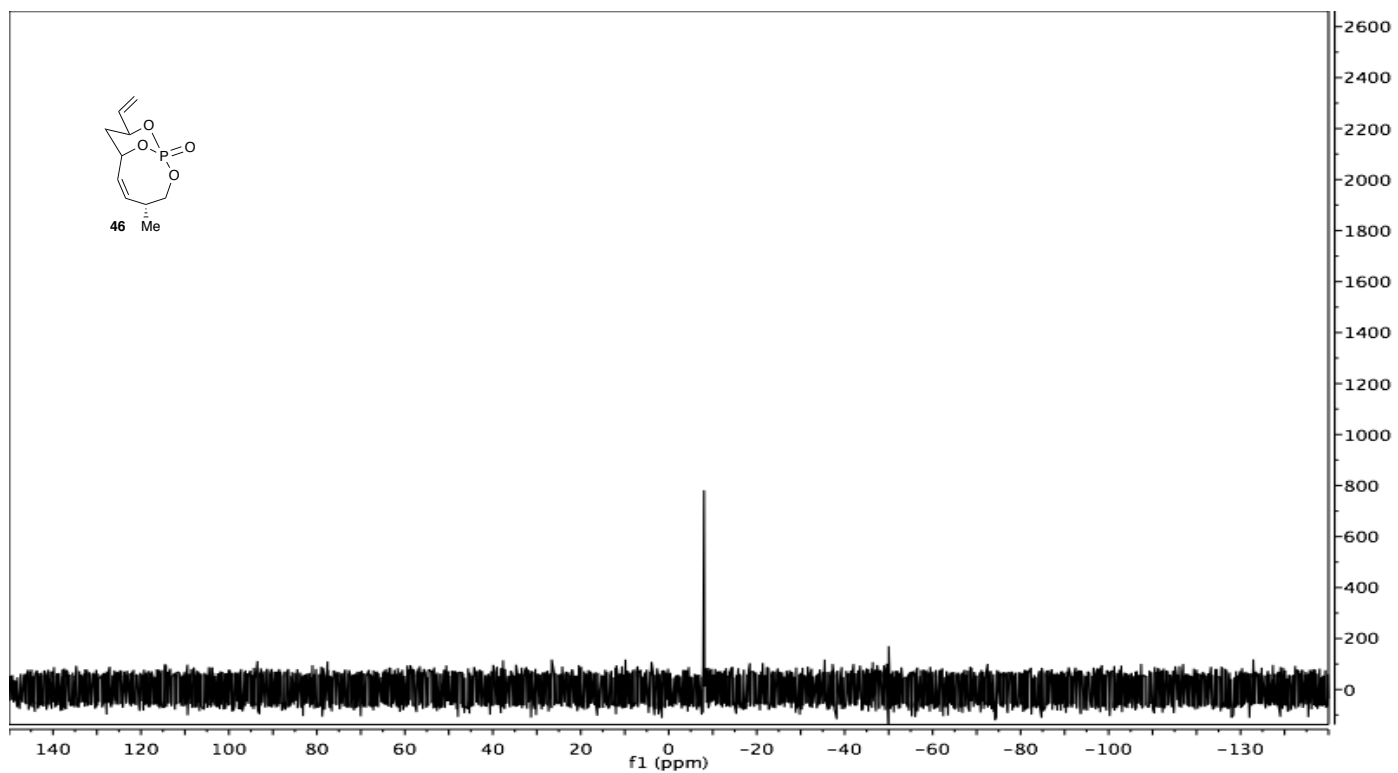

**(4*R*,6*R*)-4,6-diallyl-2-(((*R*)-1-(benzyloxy)but-3-en-2-yl)oxy)-1,3,2-dioxaphosphinane 2-oxide (50):**

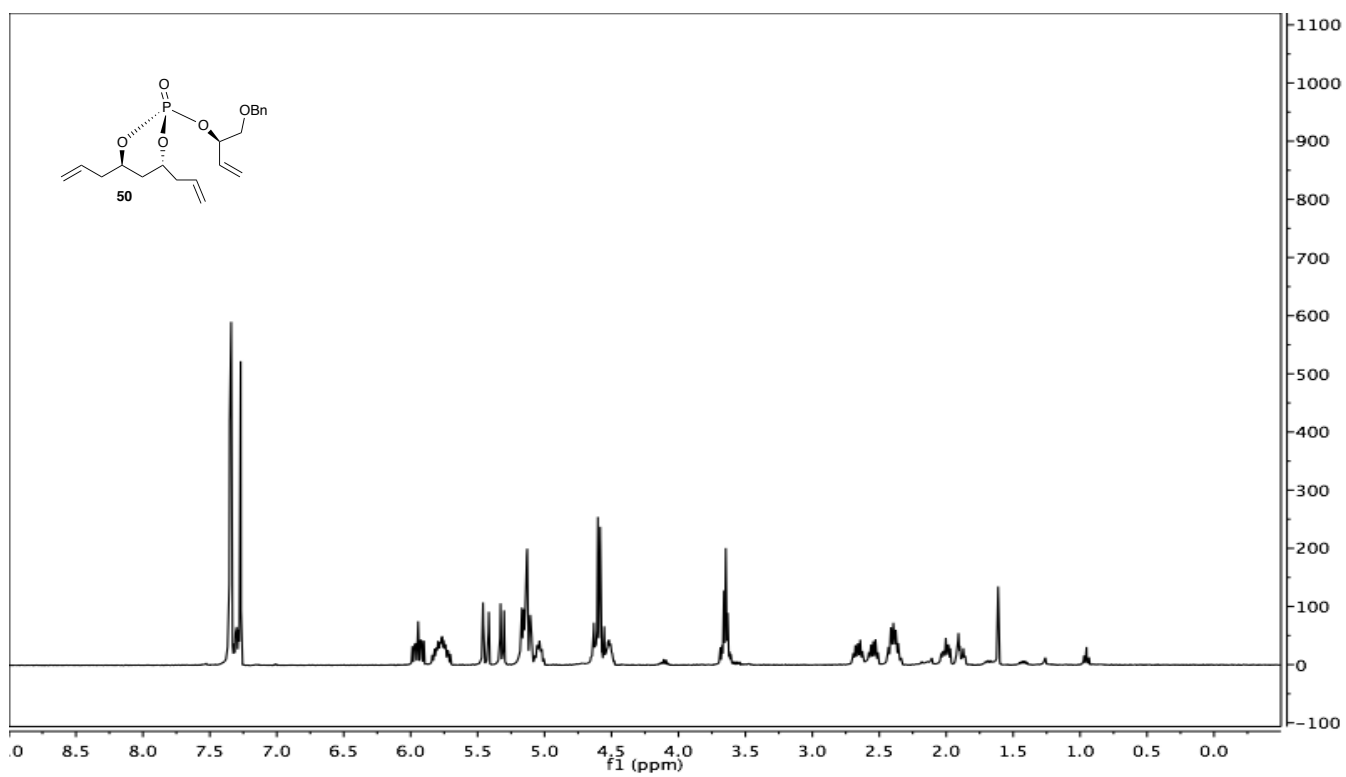

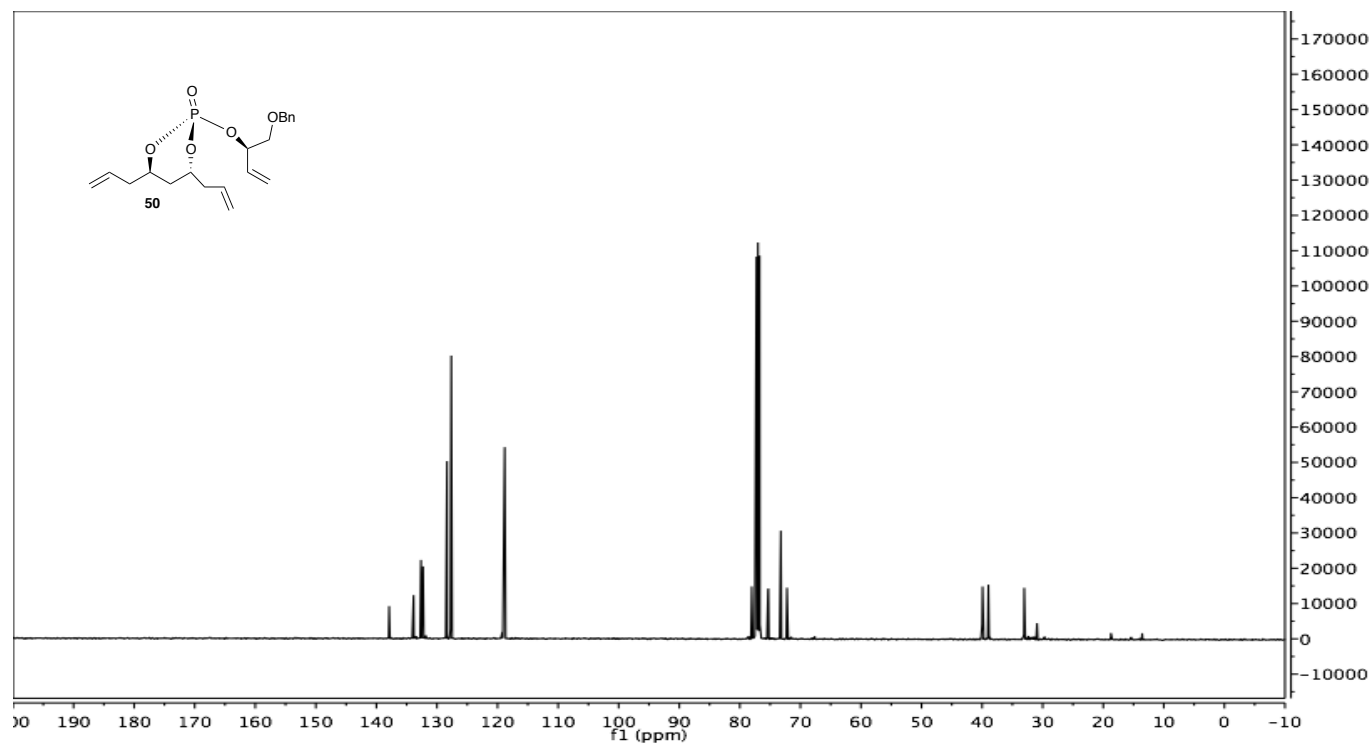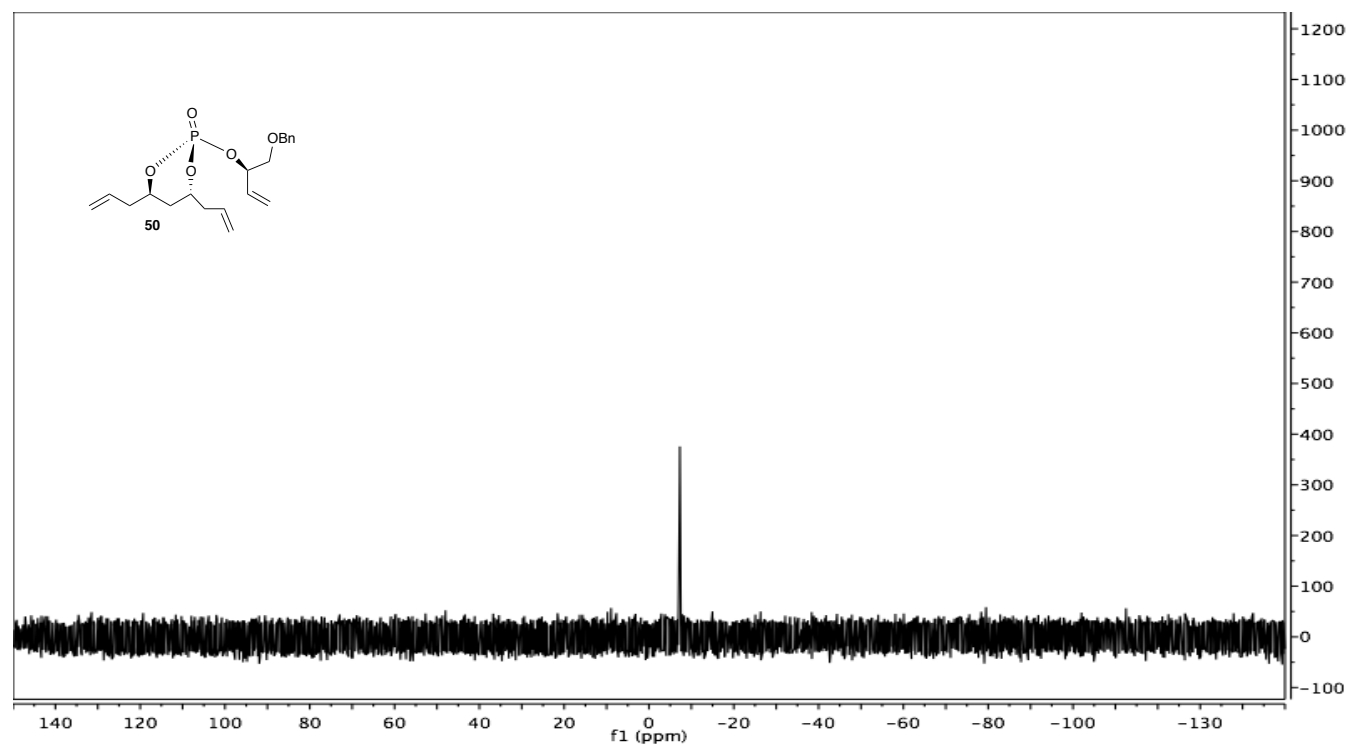

**(4*R*,6*R*)-2-(((*R*)-1-(benzyloxy)but-3-en-2-yl)oxy)-4,6-bis(2-methylallyl)-1,3,2-dioxaphosphinane 2-oxide (51):**

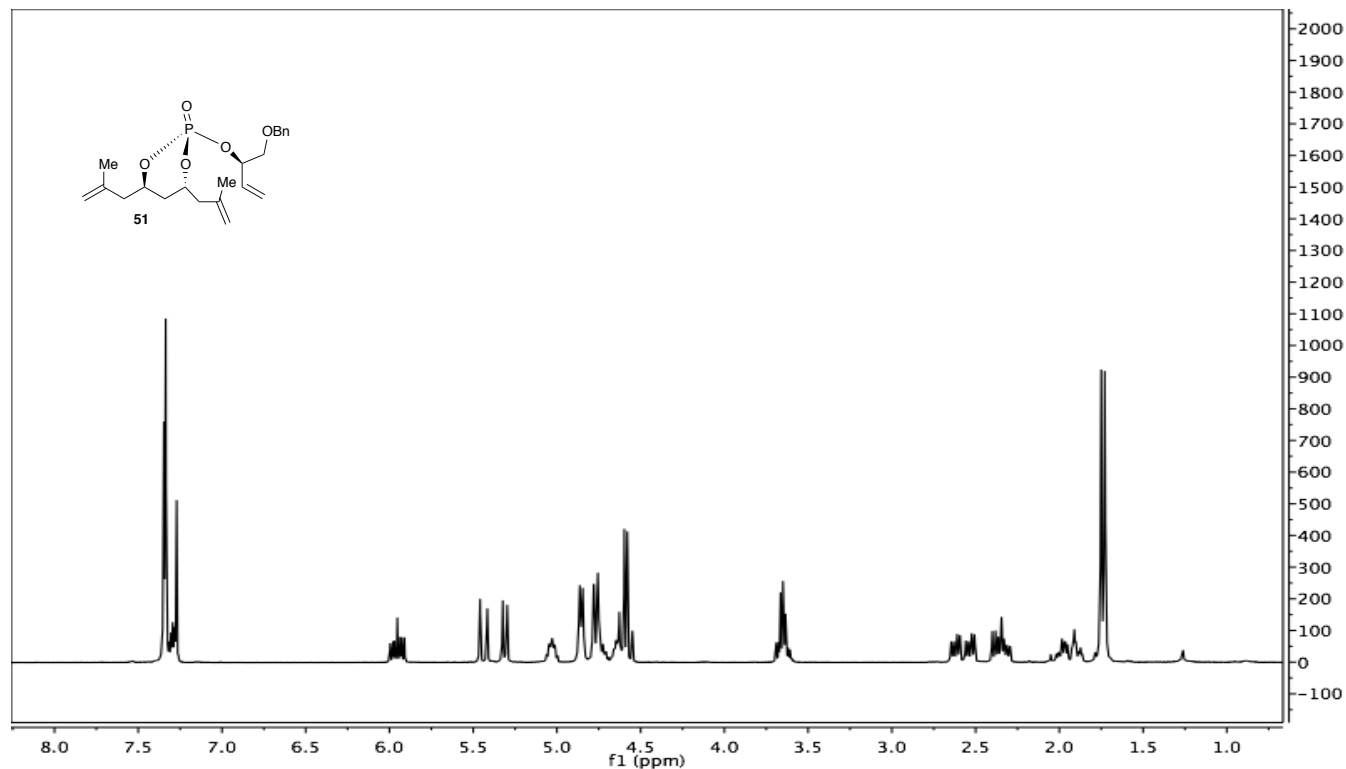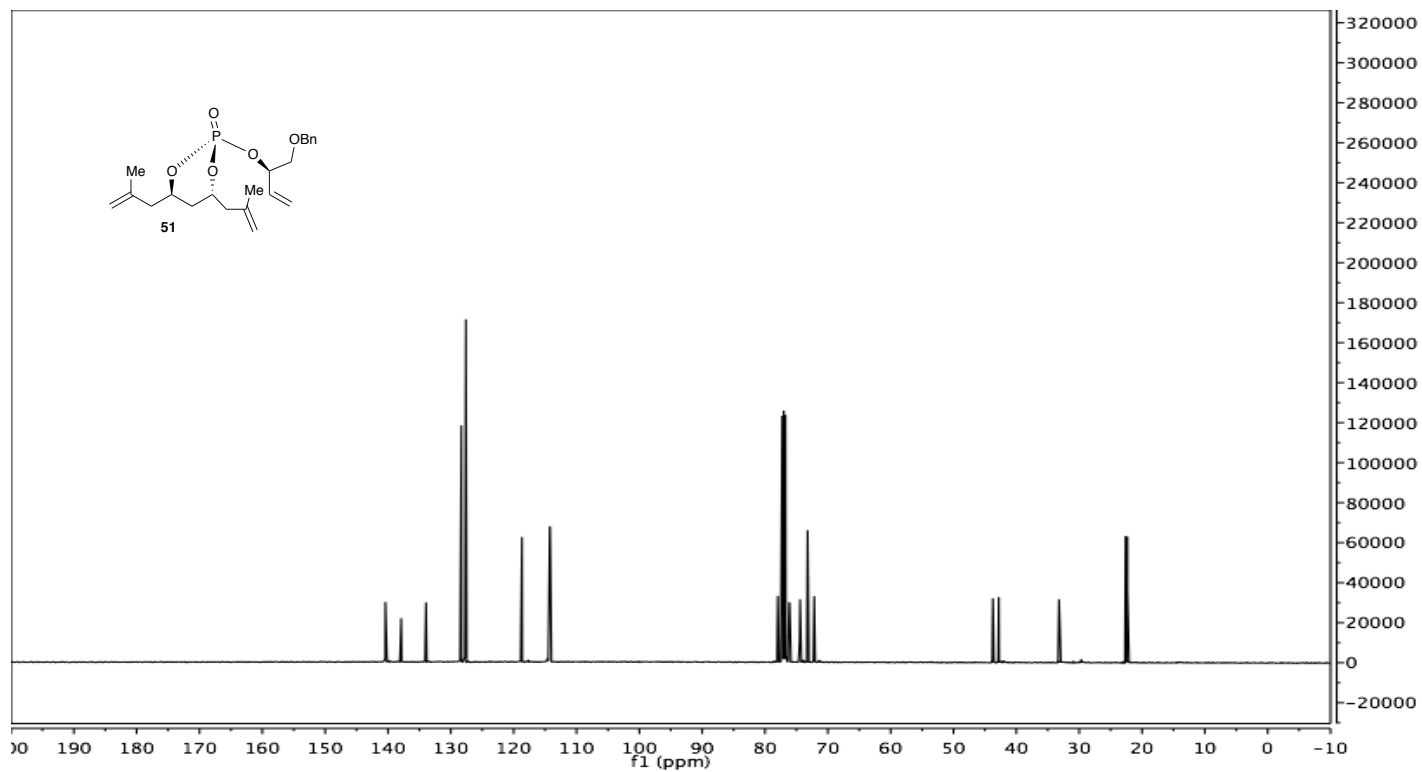

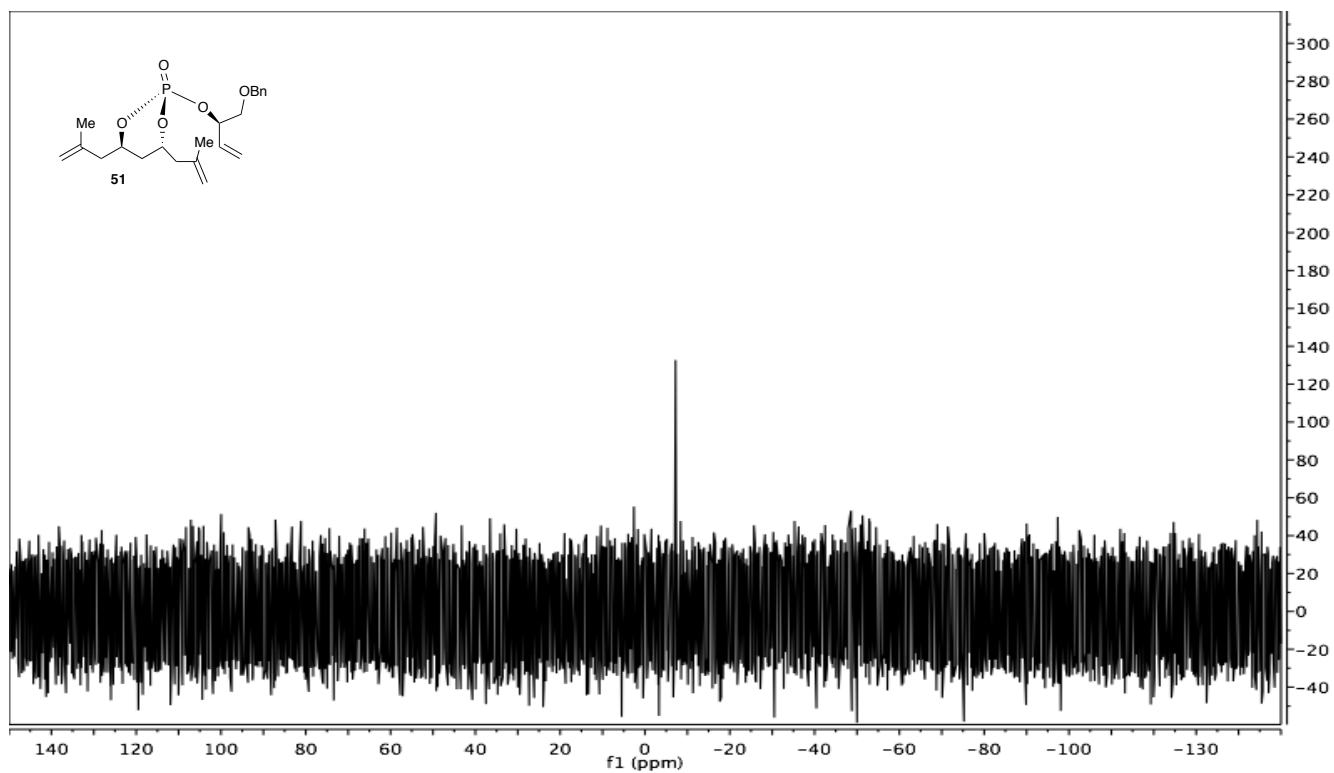

**(1*S*,3*R*,7*R*,9*R*,*Z*)-9-allyl-3-((benzyloxy)methyl)-2,10,11-trioxa-1-phosphabicyclo[5.3.1]undec-4-ene 1-oxide (*trans*-52):**

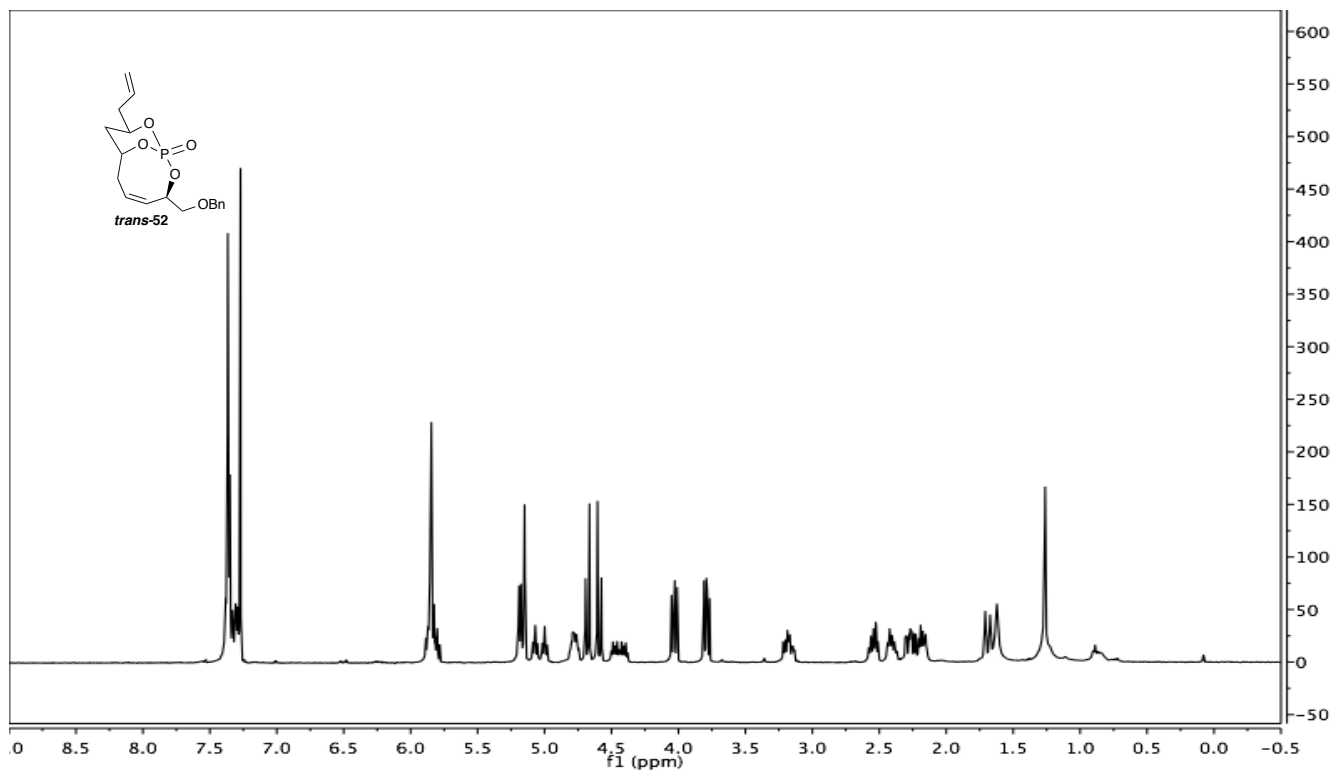

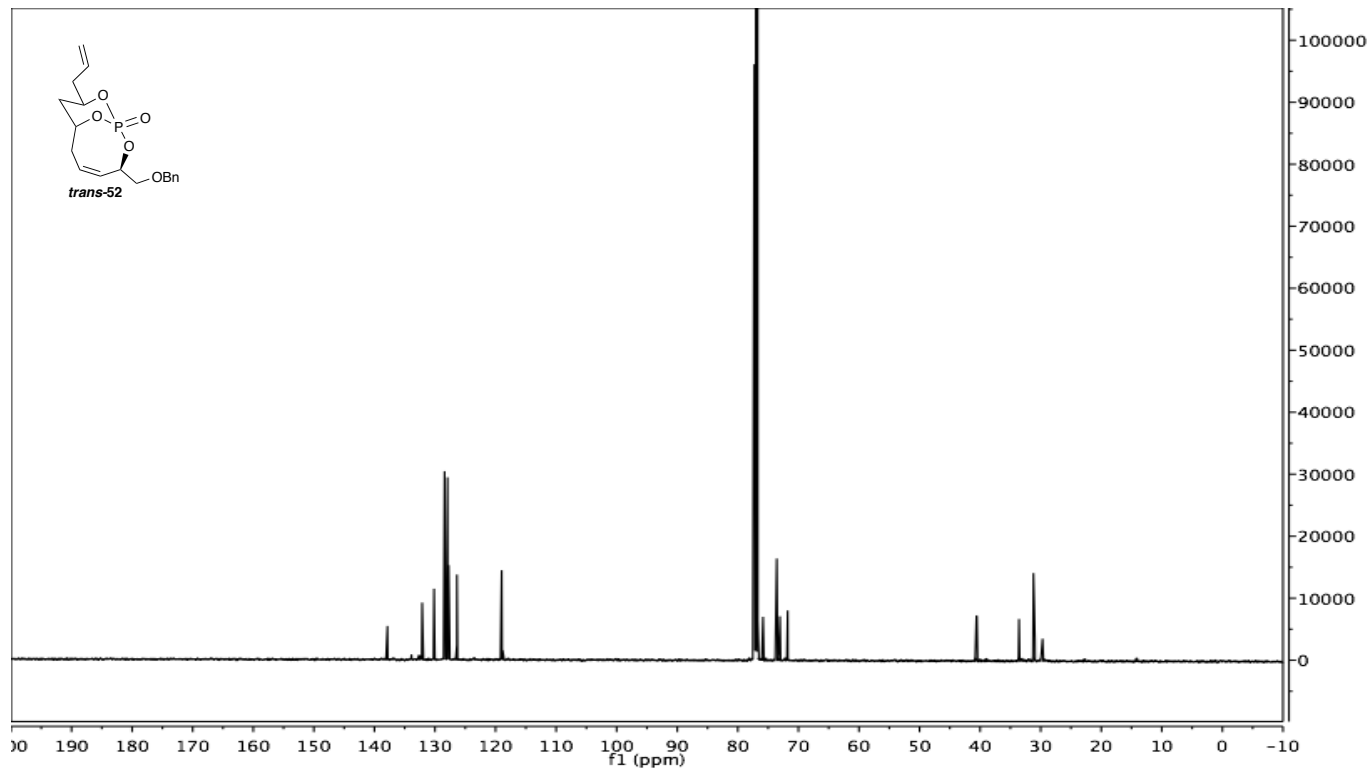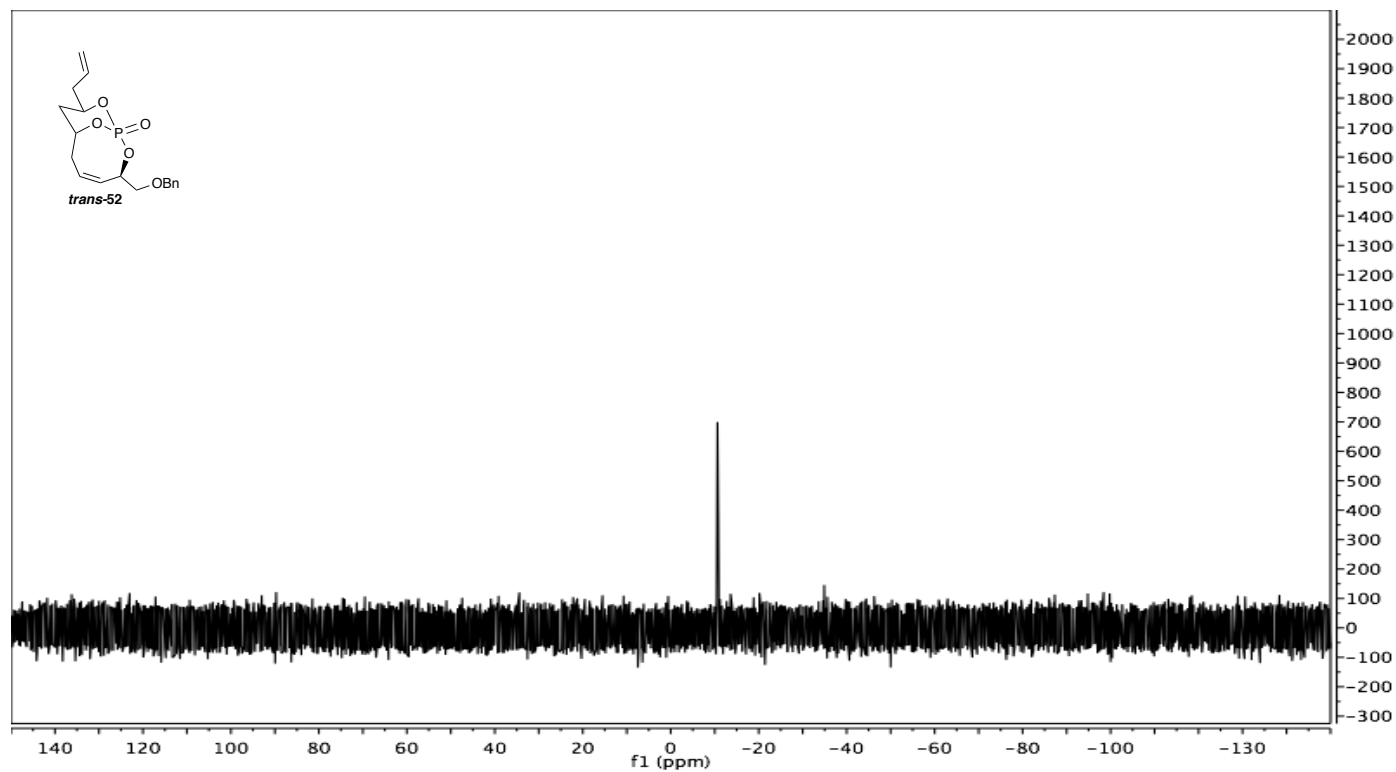

**(1*S*,3*R*,7*R*,9*R*,*Z*)-3-((benzyloxy)methyl)-5-methyl-9-(2-methylallyl)-2,10,11-trioxa-1-phosphabicyclo[5.3.1]undec-4-ene 1-oxide (*trans*-53):**

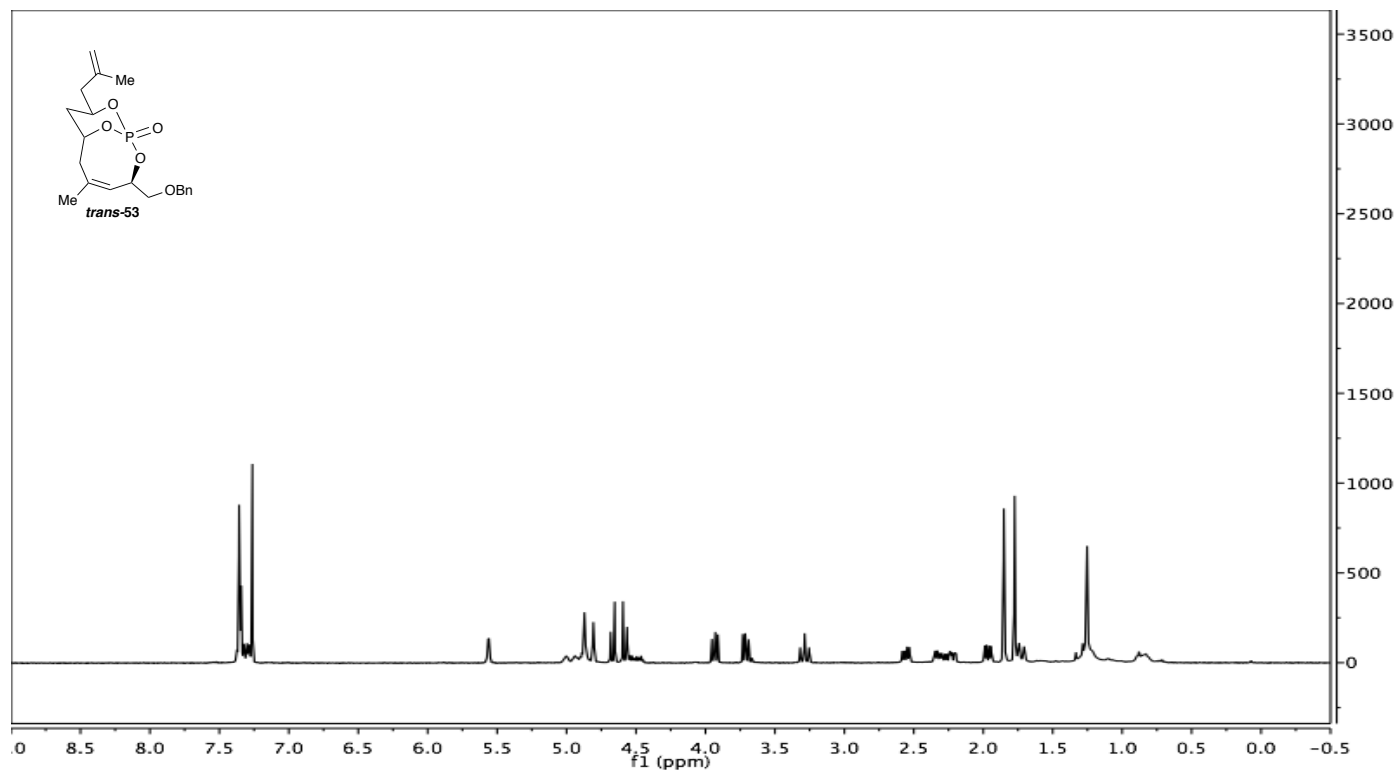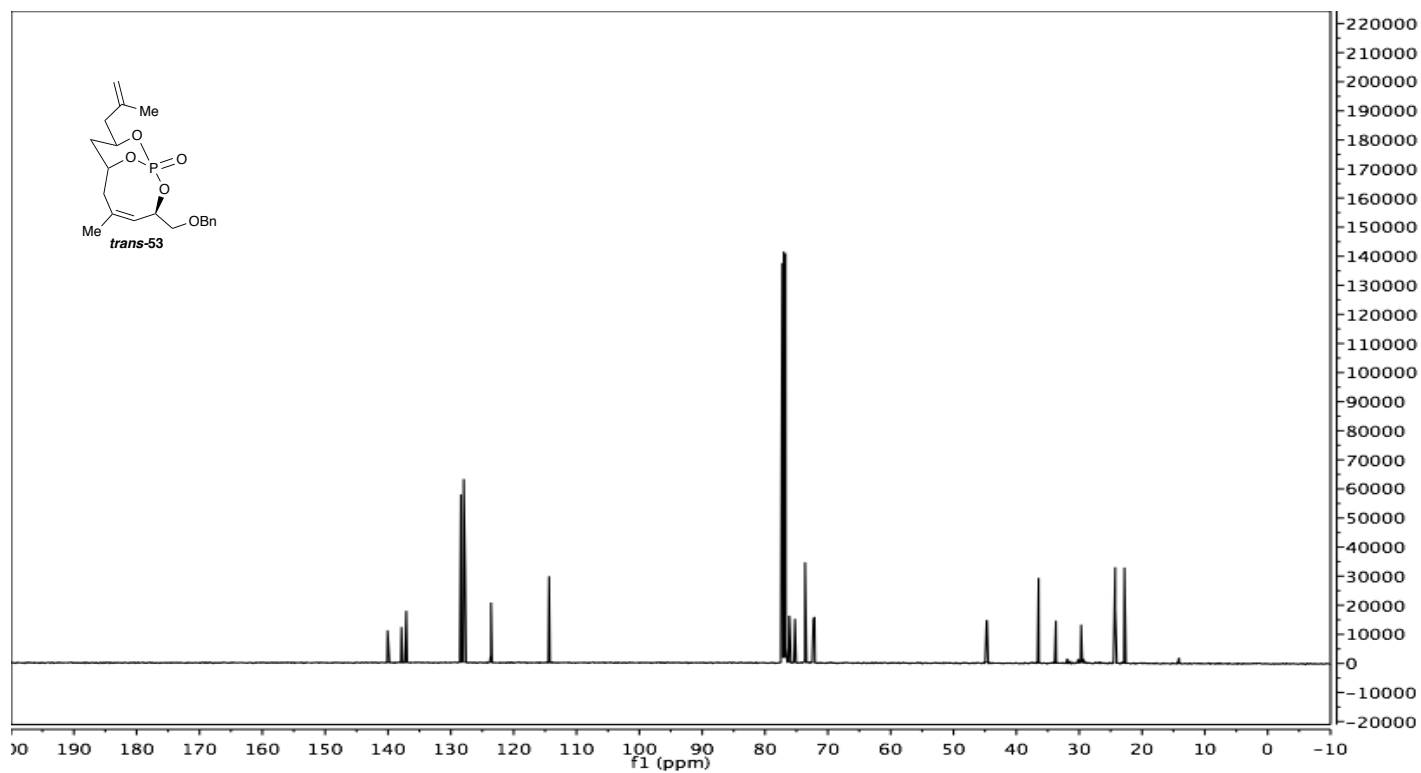

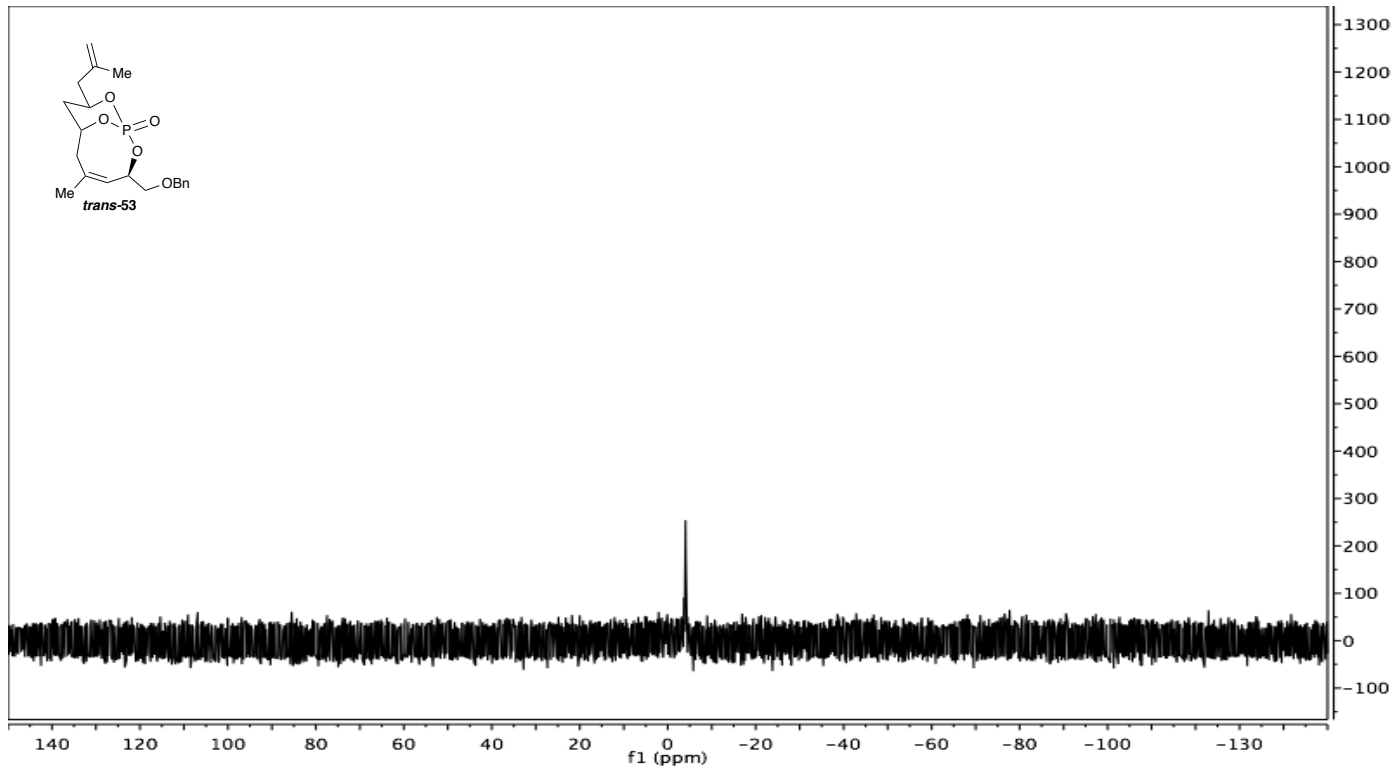

**(4*S*,6*S*)-4,6-diallyl-2-(((*R*)-1-(benzyloxy)but-3-en-2-yl)oxy)-1,3,2-dioxaphosphinane 2-oxide (56):**

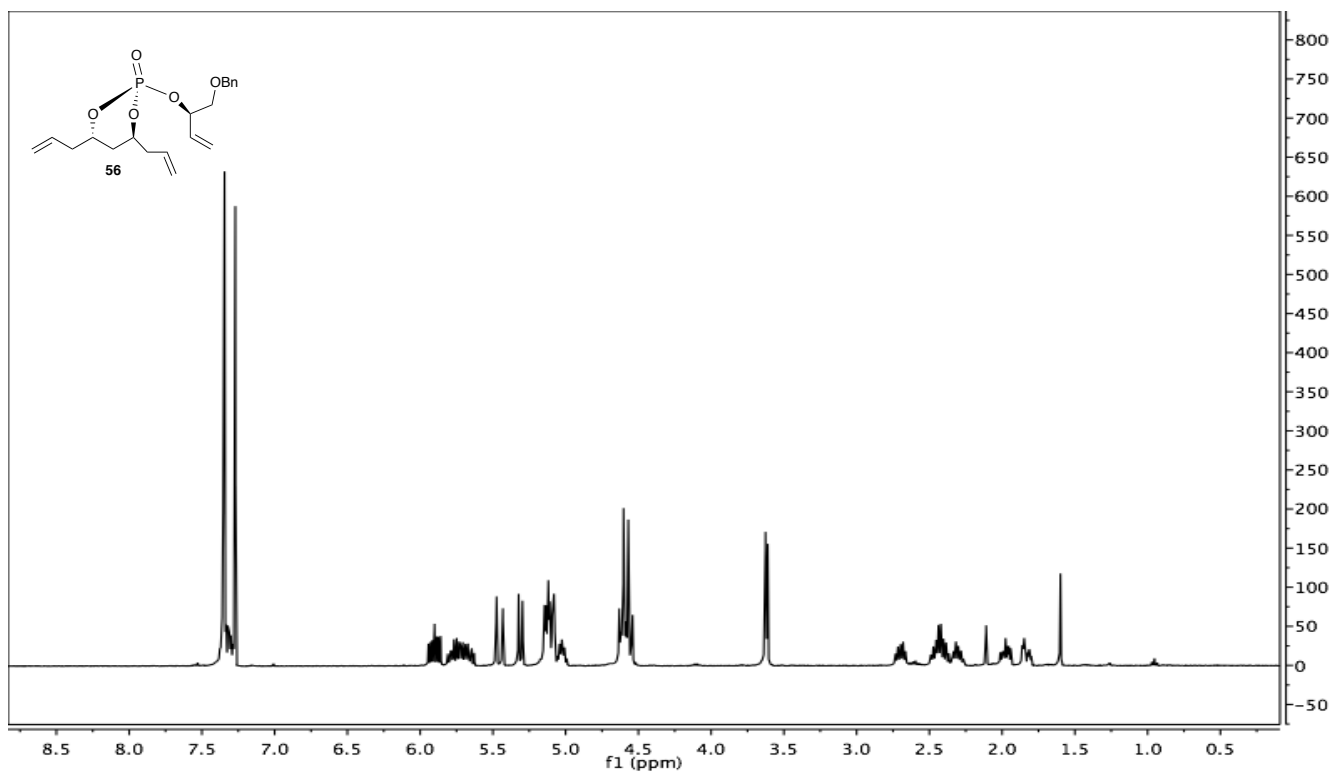

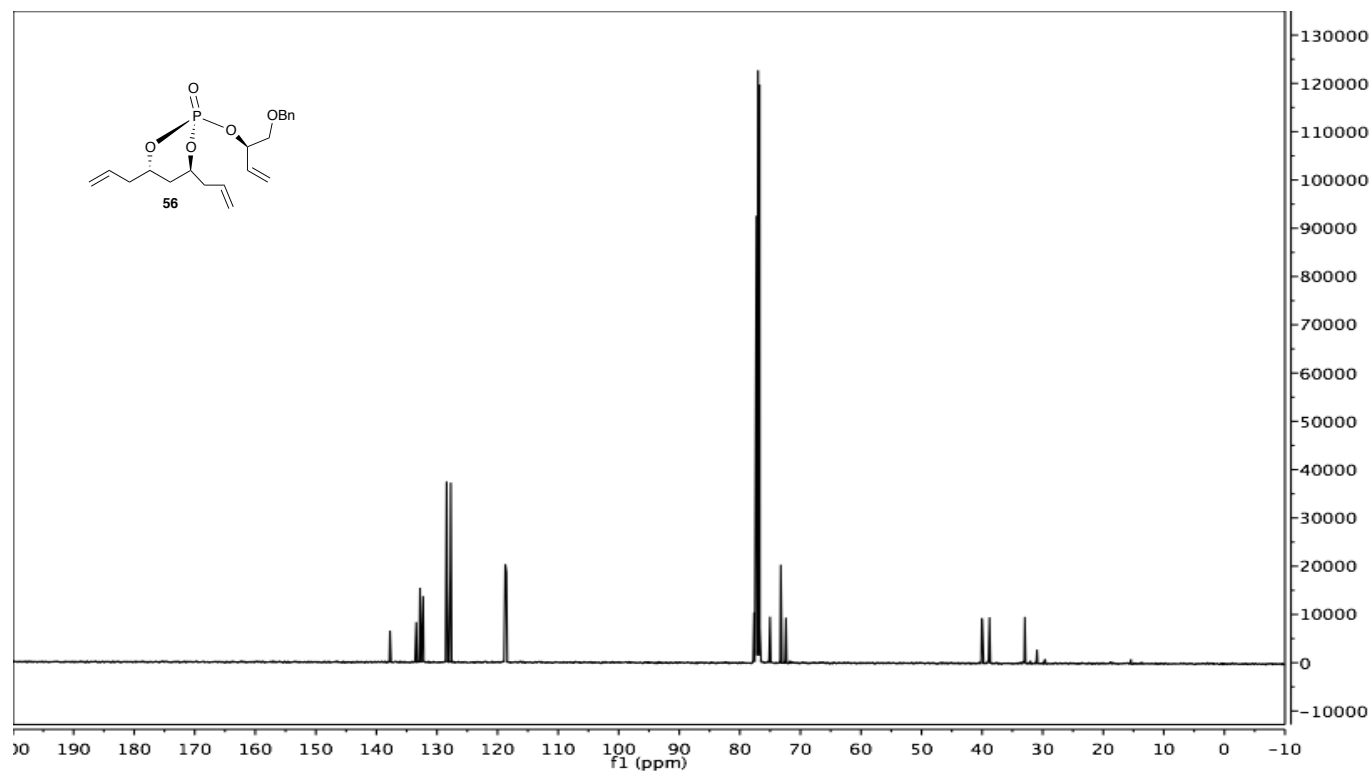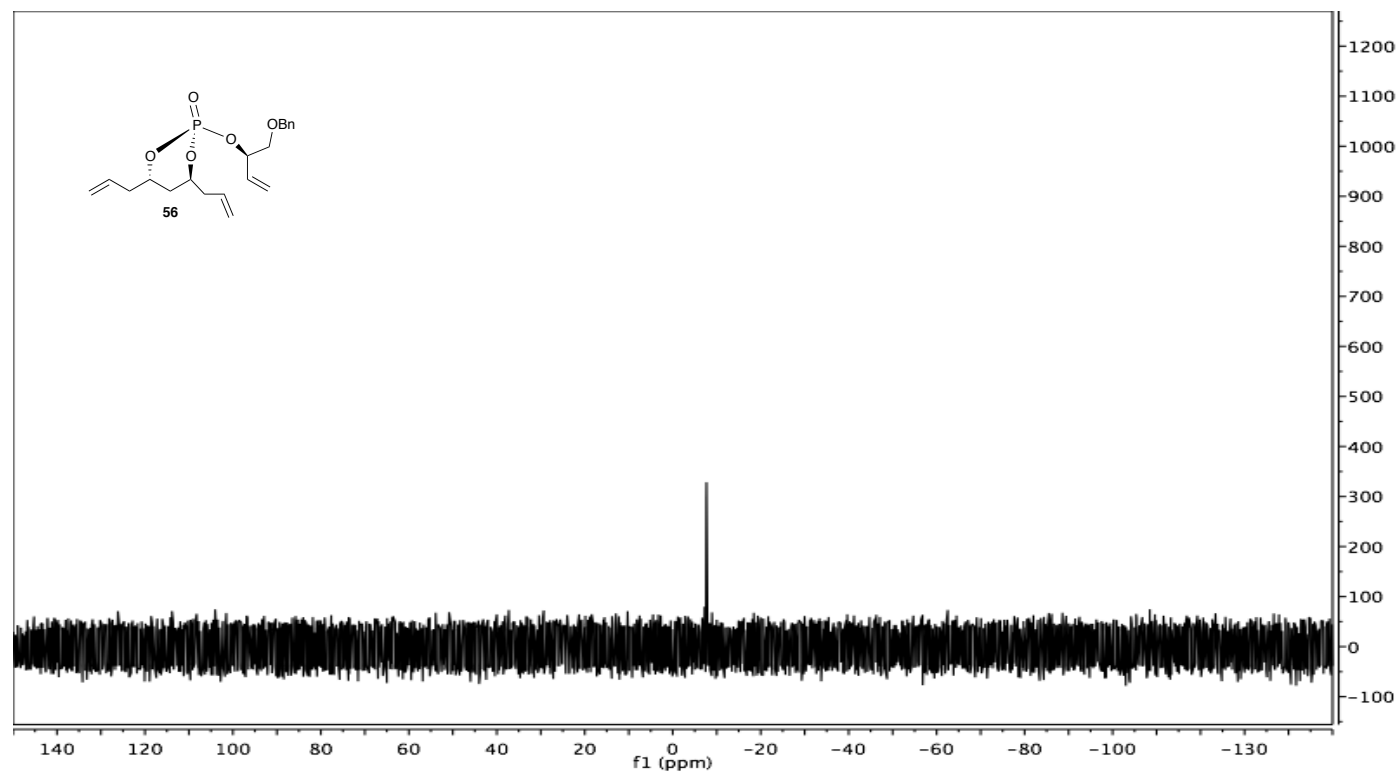



**(4*S*,6*S*)-2-(((*R*)-1-(benzyloxy)but-3-en-2-yl)oxy)-4,6-bis(2-methylallyl)-1,3,2-dioxaphosphinane 2-oxide (57):**

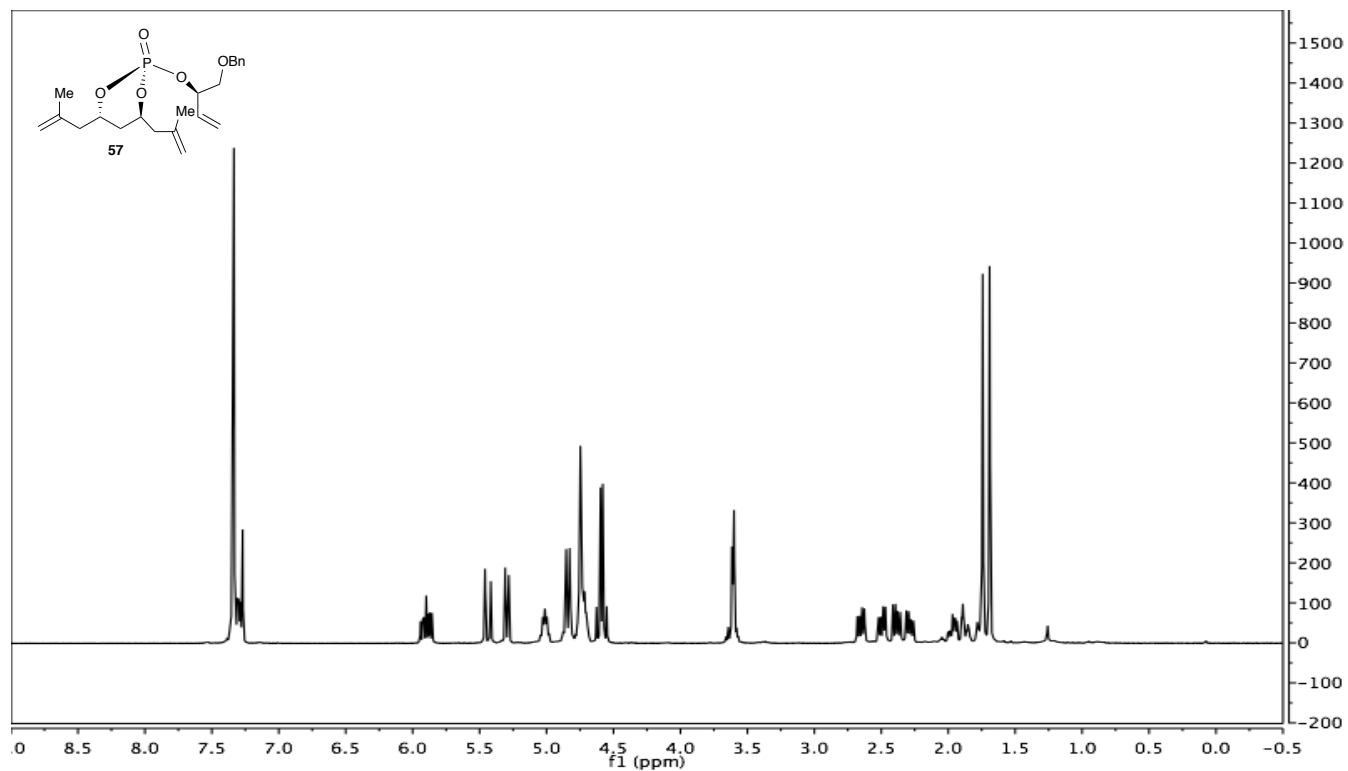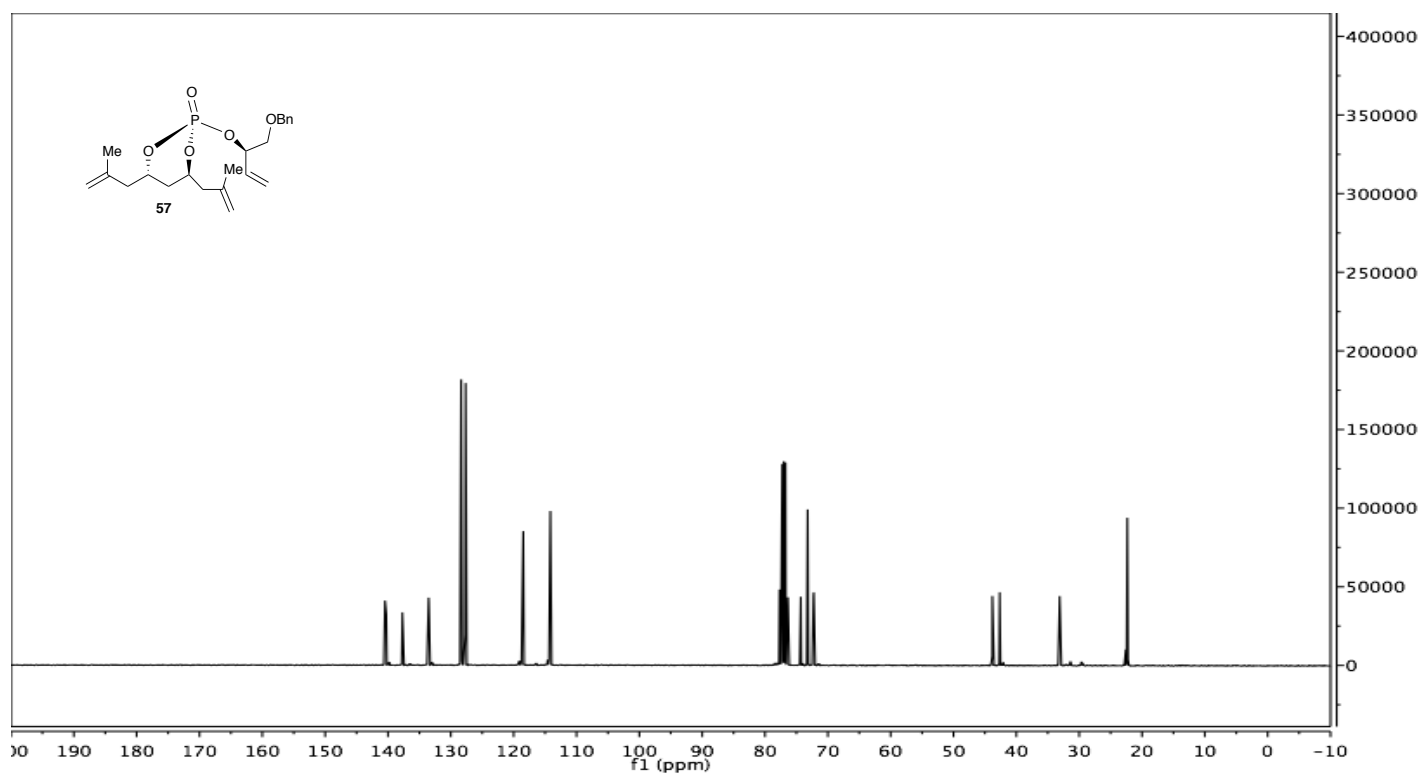

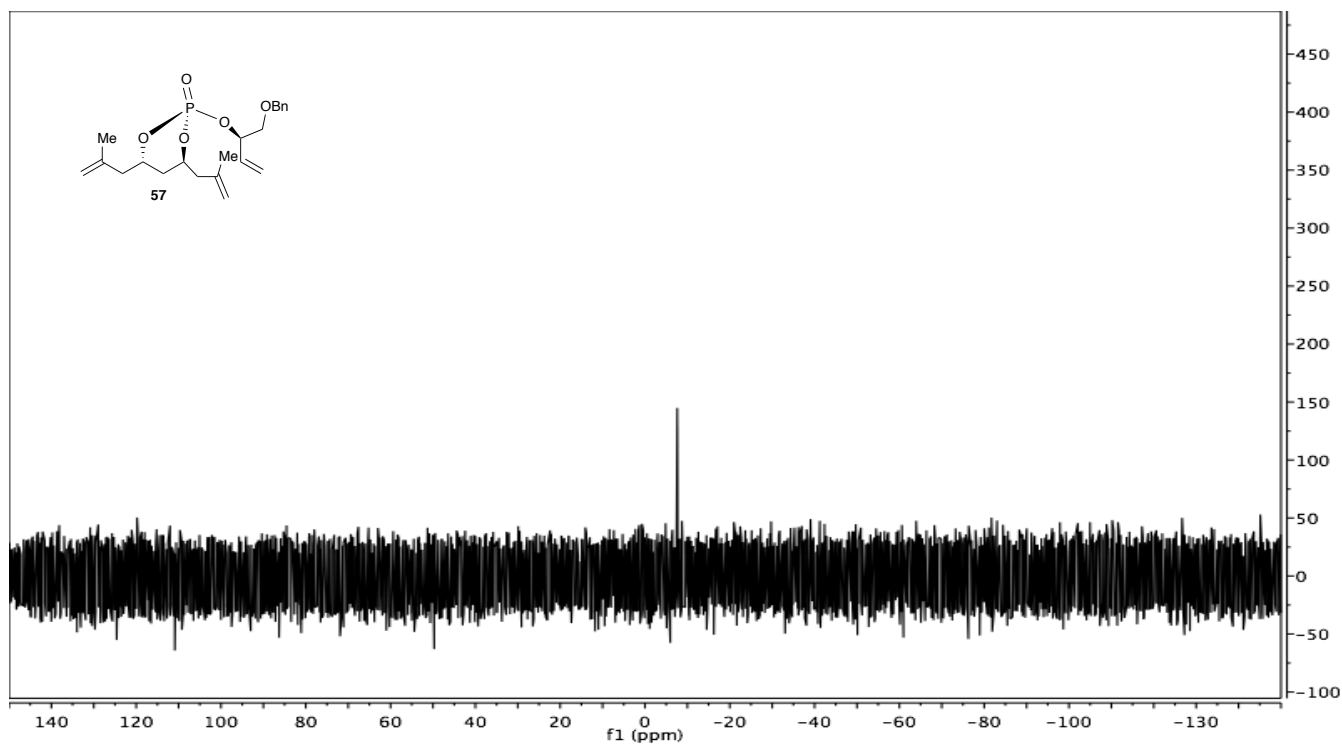

**(1*R*,3*R*,7*S*,9*S*,*Z*)-9-allyl-3-((benzyloxy)methyl)-2,10,11-trioxa-1-phosphabicyclo[5.3.1]undec-4-ene 1-oxide**  
**(*cis*-58):**

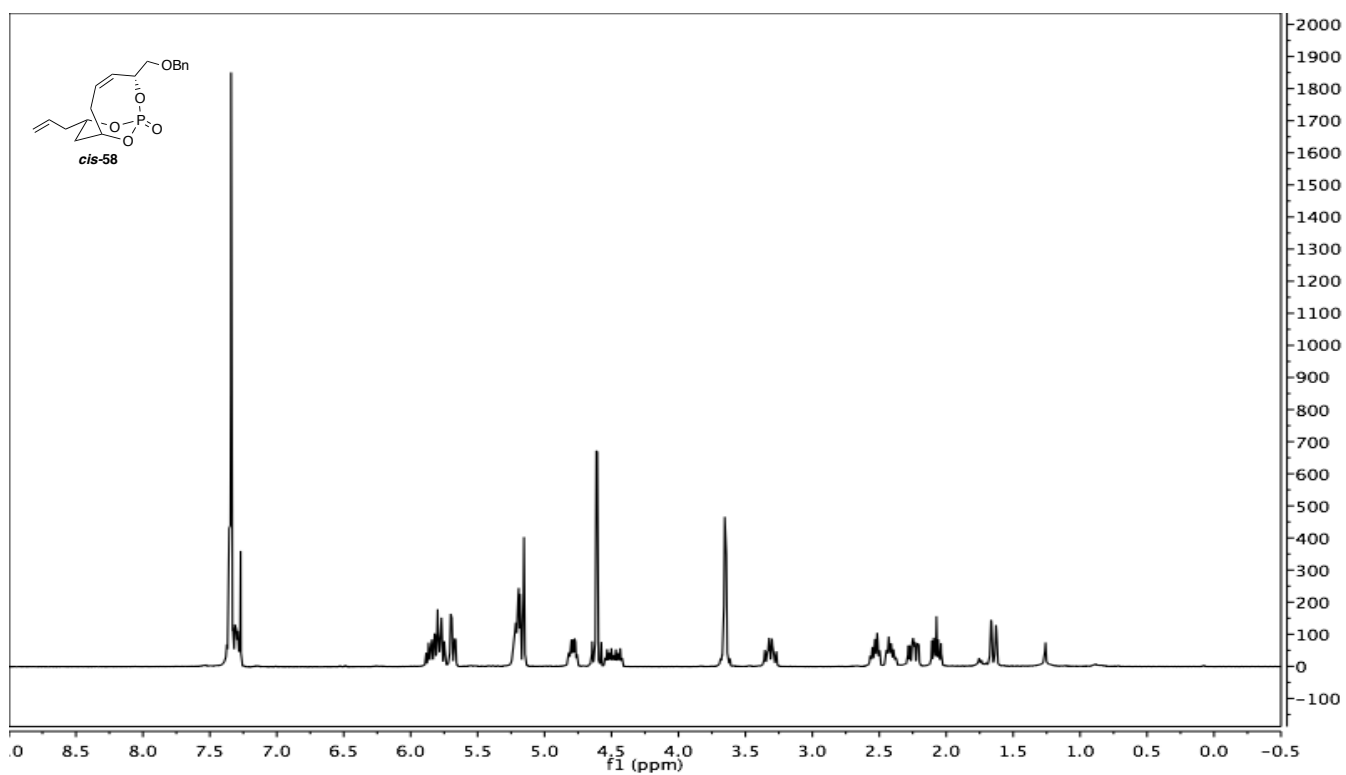

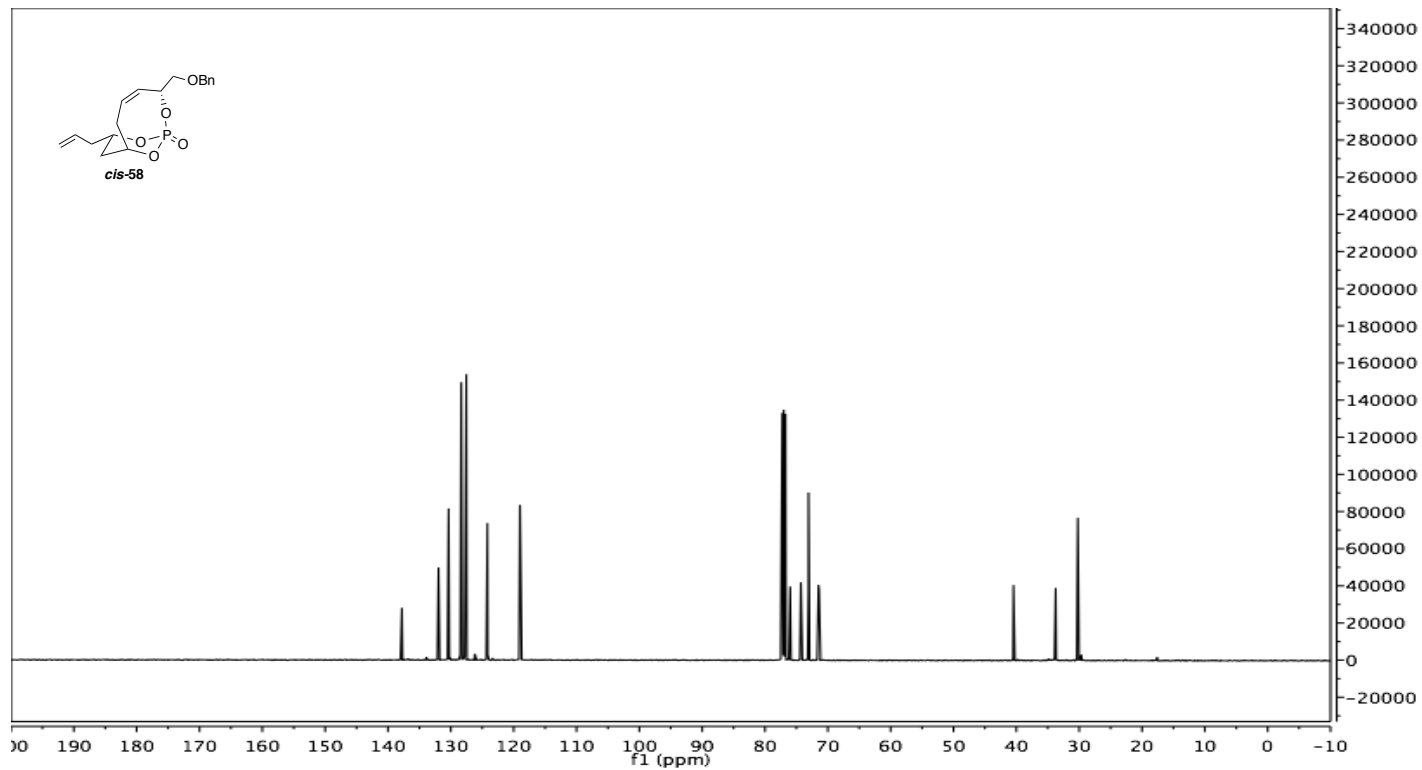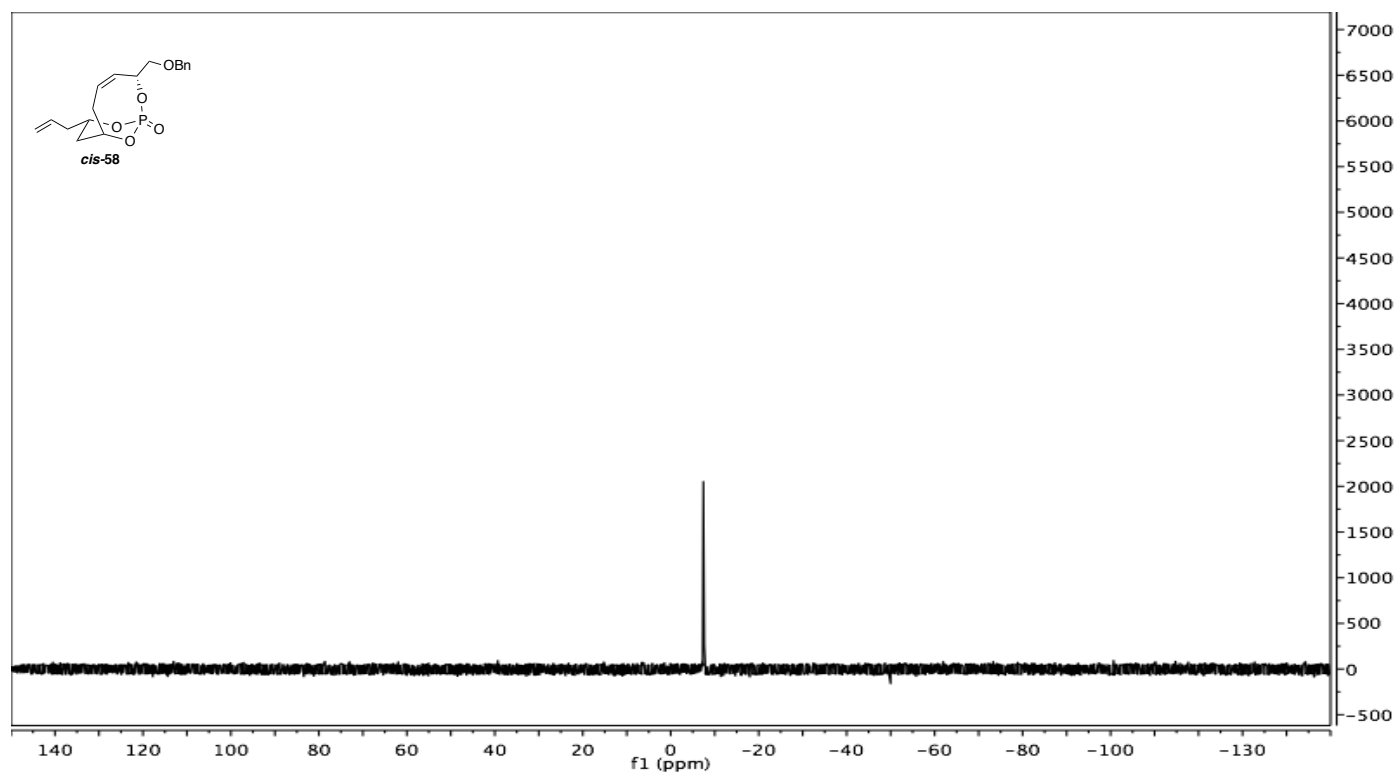

Supplement: NIHMS521647-supplement-Supporting_Information.pdf [file NIHMS521647-supplement-Supporting_Information.pdf]
